# Supplementary material for: Facile and practical access to chiral benzofused oxa-heterocycles via an asymmetric hydrogenation and intramolecular SNAr cascade
Source: Royal Society of Chemistry journal article supplement (doi:10.1039/d3qo01665j), 2023-12-15
Supplement: d3qo01665j1.pdf [file d3qo01665j1.pdf]

# Facile and practical access to chiral benzofused oxa-heterocycles via asymmetric hydrogenation and intramolecular S<sub>N</sub>Ar cascade

Fangyuan Wang,<sup>†a</sup> Ting Wu,<sup>†a</sup> Bin Lu,<sup>†a</sup> Jianchao Yu,<sup>a</sup> Renwei Xiao,<sup>a</sup> Boxuan Yi,<sup>a</sup> Xumu Zhang,<sup>a,\*</sup>  
Gen-Qiang Chen<sup>a,b,\*</sup>

<sup>a</sup>*Medi-X Pingshan and Department of Chemistry, Southern University of Science and Technology, Shenzhen 518000, People's Republic of China;*

<sup>b</sup>*Academy for Advanced Interdisciplinary Studies and Guangdong Provincial Key Laboratory of Catalysis, Southern University of Science and Technology, Shenzhen 518055, People's Republic of China;*

<sup>†</sup>These authors contributed equally.

\*Email: chengq@sustech.edu.cn; zhangxm@sustech.edu.cn

## Content

|                                                           |      |
|-----------------------------------------------------------|------|
| 1. General Information.....                               | S2   |
| 2. General Experimental Details .....                     | S3   |
| 2.1 General Procedure for the Synthesis of Substrate..... | S3   |
| 2.2 Characterization Data of Substrates.....              | S5   |
| 3. General Procedure of Asymmetric Hydrogenation.....     | S13  |
| 3.1 Characterization Data of Products .....               | S14  |
| 4. General Procedure of Transformation.....               | S26  |
| 5. NMR Spectroscopic Data .....                           | S27  |
| 6. HPLC Spectra of the Products .....                     | S76  |
| 7. Crystallographic Information.....                      | S97  |
| 8. References.....                                        | S100 |

## 1. General Information

Unless otherwise mentioned, all experiments were carried out under an atmosphere of argon or using standard Schlenk techniques. Solvents and reagents were purchased from commercial suppliers and used without further purification. Column Chromatography was performed with silica gel Merck 60 (300-400 mesh). NMR spectra were recorded on a Bruker DPX 400 spectrometer at 400 MHz for  $^1\text{H}$  NMR, 101 MHz for  $^{13}\text{C}$  NMR and a Bruker DPX 600 spectrometer at 600 MHz for  $^1\text{H}$  NMR, 151 MHz for  $^{13}\text{C}$  NMR.  $\text{CDCl}_3$  and  $d^6$ -DMSO was the solvent used for the NMR analysis, with tetramethylsilane (TMS) as the internal standard. Chemical shifts are reported in ppm and coupling constants are given in Hz. Chemical shifts were reported relative to TMS (0.00 ppm) for  $^1\text{H}$  NMR and relative to  $\text{CDCl}_3$  (77.0 ppm) for  $^{13}\text{C}$  NMR. HPLC analysis was carried out on Agilent 1260 Series instrument using a chiral stationary phase. PE refers to petroleum ether, and EA refers to ethyl acetate.

## 2. General Experimental Details

### 2.1 General Procedure for the Synthesis of Substrate

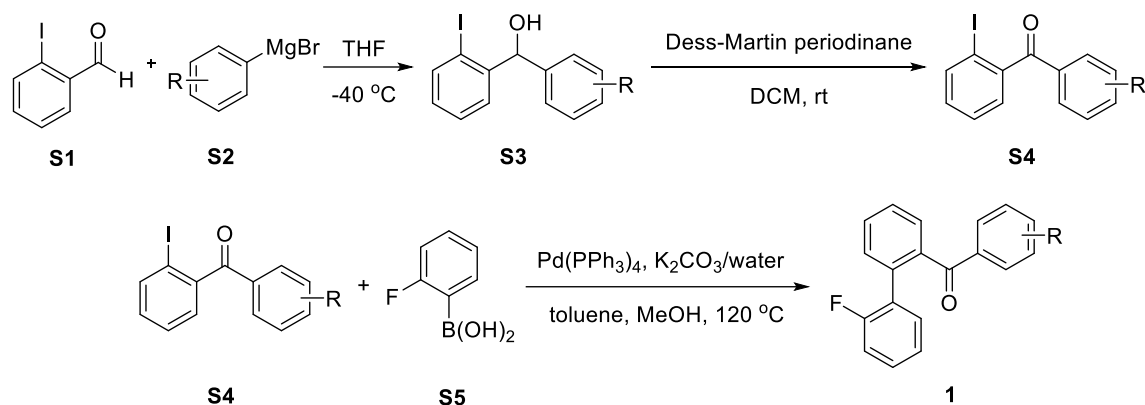

**Scheme S1.** Synthetic route of compound 1.

#### **Procedure A: Preparation of ketones 1.**<sup>1,2</sup>

*Step 1:* To a solution of 2-Iodobenzaldehyde **S1** (2.32 g, 10 mmol, 1.0 equiv.) in THF (20 mL) was added 1 M PhMgBr **S2** (15 mL, 15 mmol, 1.5 equiv.) at -40 °C. The mixture was stirred at -40 °C for 3 h until the start materials was consumed completely. The mixture was quenched by 1M HCl (10 mL) at 0 °C, extracted by EtOAc (30 mL\*2), the combined organic layer was washed by brine, dried over anhydrous Na<sub>2</sub>SO<sub>4</sub>, filtered and concentrated under vacuum. The crude product was purified by chromatography (PE:EA from 30:1 to 5:1). (2-iodophenyl)(phenyl)methanol **S3** was obtained. (90% ~ 99%).

*Step 2:* To a solution of (2-iodophenyl)(phenyl)methanol **S3** (10 mmol, 1.0 equiv.) in DCM (25 mL) was added Dess-Martin periodinane (5g, 12 mmol, 1.2 equiv.) at 0 °C. The mixture was stirred at rt for 2 h until the start materials was consumed completely. The mixture was quenched by saturated NaHCO<sub>3</sub> (5ml), filtered and extracted by DCM (20 mL\*2), the combined organic layer was dried over anhydrous Na<sub>2</sub>SO<sub>4</sub>, filtered and concentrated under vacuum. The crude product was purified by chromatography (PE:EA

from 30:1 to 5:1). (2-iodophenyl)(phenyl)methanone **S4** was obtained with an equivalent yield.

*Step 3:* To a solution of (2-iodophenyl)(phenyl)methanone **S4** (5 mmol, 1.0 equiv.), 2-Fluorophenylboronic acid **S5** (0.84 g, 6 mmol, 1.2 equiv.) and Pd(PPh<sub>3</sub>)<sub>4</sub> (0.29 g, 5% mmol.) in toluene (80 mL) and MeOH (6.4 mL). The degassed K<sub>2</sub>CO<sub>3</sub> aqueous (10ml, 1.38g/5ml water) was added. The mixture was stirred at 120 °C for 5 h until the start materials was consumed completely. The mixture was extracted by EtOAc (40 mL\*2), the combined organic layer was dried over anhydrous Na<sub>2</sub>SO<sub>4</sub>, filtered and concentrated under vacuum. Compound **1** was obtained with medium to high yield (75% ~ 96%).

## 2.2 Characterization Data of Substrates

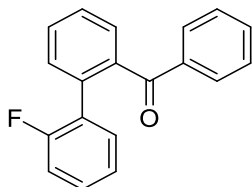

**(2'-Fluoro-[1,1'-biphenyl]-2-yl)(phenyl)methanone (1a)**<sup>3</sup>: Colourless oil, 1.35 g, 90% yield. **<sup>1</sup>H NMR** (400 MHz, Chloroform-*d*)  $\delta$  7.70 (d, 2H), 7.61 – 7.52 (m, 2H), 7.50 – 7.40 (m, 3H), 7.35 – 7.21 (m, 3H), 7.19 – 7.11 (m, 1H), 7.08 – 7.01 (m, 1H), 6.92 – 6.84 (m, 1H). **<sup>13</sup>C NMR** (101 MHz, Chloroform-*d*)  $\delta$  197.5, 159.0 (d,  $J = 247.4$  Hz), 139.1, 137.2, 135.2, 132.7, 131.4 (d,  $J = 3.0$  Hz), 131.1, 131.0, 130.5, 129.9, 129.4 (d,  $J = 8.1$  Hz), 129.1, 128.0, 127.8, 127.5, 124.0 (d,  $J = 3.0$  Hz), 115.4, 115.2. **<sup>19</sup>F NMR** (376 MHz, Chloroform-*d*)  $\delta$  -115.8. **HRMS** (ESI-TOF)  $m/z$ :  $[M+H]^+$  Calcd for C<sub>19</sub>H<sub>14</sub>FO<sup>+</sup> = 277.1023; Found 277.1023.

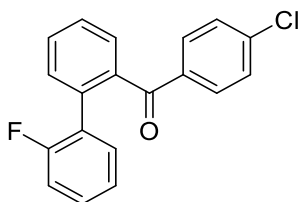

**(4-Chlorophenyl)(2'-fluoro-[1,1'-biphenyl]-2-yl)methanone (1b)**<sup>1</sup>: White solid, 0.57 g, 77% yield. **<sup>1</sup>H NMR** (400 MHz, Chloroform-*d*)  $\delta$  7.68 – 7.56 (m, 3H), 7.56 – 7.44 (m, 3H), 7.34 – 7.24 (m, 3H), 7.23 – 7.15 (m, 1H), 7.11 – 7.02 (t, 1H), 6.95 – 6.86 (t, 1H). **<sup>13</sup>C NMR** (101 MHz, Chloroform-*d*)  $\delta$  196.3, 158.9 (d,  $J = 242.4$  Hz), 139.1, 138.6, 135.6, 135.1, 131.4 (d,  $J = 10.1$  Hz), 131.2, 131.1, 130.8, 129.6 (d,  $J = 10.0, 1.0$  Hz), 129.0, 128.4, 127.8, 127.6, 124.2 (d,  $J = 3.0$  Hz), 115.4 (d,  $J = 20.2$  Hz). **<sup>19</sup>F NMR** (376 MHz, Chloroform-*d*)  $\delta$  -115.9. **HRMS** (ESI-TOF)  $m/z$ :  $[M+H]^+$  Calcd for C<sub>19</sub>H<sub>13</sub>ClFO<sup>+</sup> = 311.0633; Found 311.0631.

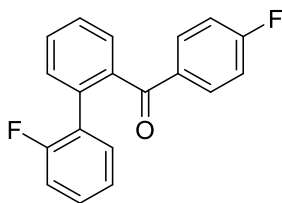

**(2'-Fluoro-[1,1'-biphenyl]-2-yl)(4-fluorophenyl)methanone (1c)**<sup>1</sup>: White solid, 0.87 g, 95% yield. **<sup>1</sup>H NMR** (400 MHz, Chloroform-*d*)  $\delta$  7.77 – 7.66 (m, 2H), 7.63 – 7.44 (m, 4H), 7.29 – 7.14 (m, 2H), 7.10 – 6.85 (m, 4H). **<sup>13</sup>C NMR** (101 MHz, Chloroform-*d*)  $\delta$  196.1, 165.5 (d,  $J = 252.5$  Hz), 159.0 (d,  $J = 242.4$  Hz), 138.9, 135.1, 133.7 (d,  $J = 3.0$  Hz), 132.5 (d,  $J = 9.1$  Hz), 131.4 (d,  $J = 3.0$  Hz), 131.1, 130.7, 129.6 (d,  $J = 8.1$  Hz), 129.0, 127.8 (d,  $J = 15.2$  Hz), 127.7, 124.2 (d,  $J = 4.0$  Hz), 115.6, 115.3, 115.1. **<sup>19</sup>F NMR** (376 MHz, Chloroform-*d*)  $\delta$  -105.5, -115.9. **HRMS** (ESI-TOF)  $m/z$ :  $[M+H]^+$  Calcd for  $C_{19}H_{13}F_2O^+$  = 295.0929; Found 295.0927.

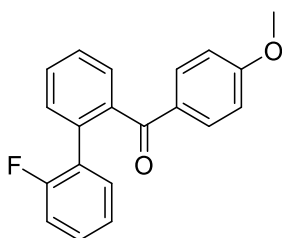

**(2'-Fluoro-[1,1'-biphenyl]-2-yl)(4-methoxyphenyl)methanone (1d)**<sup>1</sup>: Black solid, 1.52 g, 99% yield. **<sup>1</sup>H NMR** (400 MHz, Chloroform-*d*)  $\delta$  7.70 (d,  $J = 8.7$  Hz, 2H), 7.60 – 7.42 (m, 4H), 7.25 (t, 1H), 7.22 – 7.14 (m, 1H), 7.05 (t,  $J = 7.5$  Hz, 1H), 6.92 (t, 1H), 6.81 (d,  $J = 8.8$  Hz, 2H), 3.81 (s, 3H). **<sup>13</sup>C NMR** (101 MHz, Chloroform-*d*)  $\delta$  196.2, 163.3, 159.0 (d,  $J = 246.4$  Hz), 139.5, 134.9, 132.3, 131.4 (d,  $J = 3.0$  Hz), 131.0, 130.1, 129.4 (d,  $J = 8.1$  Hz), 128.8, 127.9 (d,  $J = 15.2$  Hz), 127.4, 124.0 (d,  $J = 3.0$  Hz), 115.5, 115.3, 113.3, 55.4. **<sup>19</sup>F NMR** (565 MHz, Chloroform-*d*)  $\delta$  -115.9. **HRMS** (ESI-TOF)  $m/z$ :  $[M+H]^+$  Calcd for  $C_{20}H_{16}FO_2^+$  = 307.1129; Found 307.1128.

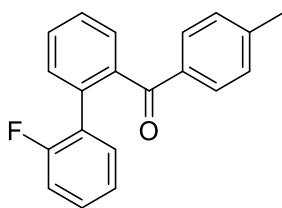

**(2'-Fluoro-[1,1'-biphenyl]-2-yl)(p-tolyl)methanone (1e)**<sup>1</sup>: White solid, 1.22 g, 84% yield. <sup>1</sup>H NMR (400 MHz, Chloroform-*d*) δ 7.66 – 7.50 (m, 4H), 7.44 (t, *J* = 7.6 Hz, 2H), 7.29 – 7.22 (m, 1H), 7.22 – 7.10 (m, 3H), 7.06 (t, *J* = 7.1 Hz, 1H), 6.91 (t, 1H), 2.35 (s, 3H). <sup>13</sup>C NMR (101 MHz, Chloroform-*d*) δ 197.2, 159.0 (d, *J* = 252.5 Hz), 143.6, 139.4, 135.1, 134.7, 131.4 (d, *J* = 3.0 Hz), 131.1, 130.3, 130.1, 129.4 (d, *J* = 8.1 Hz), 129.0, 128.8, 127.9 (d, *J* = 15.3 Hz), 127.4, 124.0 (d, *J* = 3.0 Hz), 115.4 (d, *J* = 22.2 Hz), 21.6. <sup>19</sup>F NMR (376 MHz, Chloroform-*d*) δ -115.9. HRMS (ESI-TOF) *m/z*: [M+H]<sup>+</sup> Calcd for C<sub>20</sub>H<sub>16</sub>FO<sup>+</sup> = 291.1180; Found 291.1178.

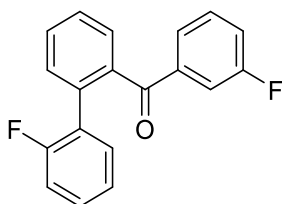

**(2'-Fluoro-[1,1'-biphenyl]-2-yl)(3-fluorophenyl)methanone (1f)**<sup>1</sup>: White solid, 0.52 g, 85% yield. <sup>1</sup>H NMR (400 MHz, Chloroform-*d*) δ 7.64 – 7.53 (m, 2H), 7.52 – 7.36 (m, 4H), 7.32 – 7.04 (m, 5H), 6.95 – 6.85 (m, 1H). <sup>13</sup>C NMR (101 MHz, Chloroform-*d*) δ 196.2, 162.3 (d, *J* = 252.5 Hz), 158.9 (d, *J* = 246.4 Hz), 139.4 (d, *J* = 7.1 Hz), 138.5, 135.2, 131.3 (d, *J* = 3.0 Hz), 131.1, 130.9, 129.7 (d, *J* = 4.0 Hz), 129.6 (d, *J* = 4.0 Hz), 129.1, 127.7 (d, *J* = 15.2 Hz), 127.6, 125.7 (d, *J* = 3.0 Hz), 124.2 (d, *J* = 4.0 Hz), 119.7 (d, *J* = 21.2 Hz), 116.3 (d, *J* = 23.2 Hz), 115.4 (d, *J* = 22.2 Hz). <sup>19</sup>F NMR (376 MHz, Chloroform-*d*) δ -112.5, -115.8. HRMS (ESI-TOF) *m/z*: [M+H]<sup>+</sup> Calcd for C<sub>19</sub>H<sub>13</sub>F<sub>2</sub>O<sup>+</sup> = 295.0929; Found 295.0929.

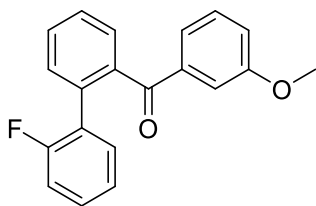

**(2'-Fluoro-[1,1'-biphenyl]-2-yl)(3-methoxyphenyl)methanone (1g)**<sup>1</sup>: White solid, 2.13 g, 81% yield. **<sup>1</sup>H NMR** (600 MHz, Chloroform-*d*)  $\delta$  7.60 – 7.53 (m, 2H), 7.46 (t, *J* = 7.1 Hz, 2H), 7.28 – 7.15 (m, 5H), 7.08 – 7.03 (m, 1H), 7.02 – 6.98 (m, 1H), 6.91 (t, 1H), 3.77 (s, 3H). **<sup>13</sup>C NMR** (151 MHz, Chloroform-*d*)  $\delta$  197.3, 159.0 (d, *J* = 246.1 Hz), 159.3, 139.1, 138.6, 135.2, 131.4 (d, *J* = 3.0 Hz), 131.1, 130.5, 129.4 (d, *J* = 9.1 Hz), 129.1, 129.0, 127.9 (d, *J* = 15.1 Hz), 127.4, 124.0 (d, *J* = 4.5 Hz), 123.0, 119.6, 115.4 (d, *J* = 22.6 Hz), 113.5, 55.3. **<sup>19</sup>F NMR** (565 MHz, Chloroform-*d*)  $\delta$  -115.8. **HRMS** (ESI-TOF) *m/z*: [M+H]<sup>+</sup> Calcd for C<sub>20</sub>H<sub>16</sub>FO<sub>2</sub><sup>+</sup> = 307.1129; Found 307.1126.

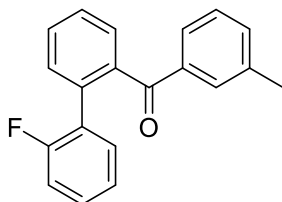

**(2'-Fluoro-[1,1'-biphenyl]-2-yl)(m-tolyl)methanone (1h)**<sup>1</sup>: Yellow oil, 1.1 g, 95% yield. **<sup>1</sup>H NMR** (400 MHz, Chloroform-*d*)  $\delta$  7.60 – 7.43 (m, 6H), 7.27 – 7.12 (m, 4H), 7.07 – 7.01 (m, 1H), 6.92 – 6.85 (m, 1H), 2.30 (s, 3H). **<sup>13</sup>C NMR** (101 MHz, Chloroform-*d*)  $\delta$  197.7, 159.0 (d, *J* = 246.4 Hz), 139.2, 137.7, 137.2, 135.2, 133.5, 131.4 (d, *J* = 4.0 Hz), 131.0, 130.4, 129.4 (d, *J* = 8.1 Hz), 129.2, 128.1, 127.9, 127.5, 127.2, 124.0 (d, *J* = 4.0 Hz), 115.4, 115.2, 21.1. **<sup>19</sup>F NMR** (376 MHz, Chloroform-*d*)  $\delta$  -115.6. **HRMS** (ESI-TOF) *m/z*: [M+H]<sup>+</sup> Calcd for C<sub>20</sub>H<sub>16</sub>FO<sup>+</sup> = 291.1180; Found 291.1178.

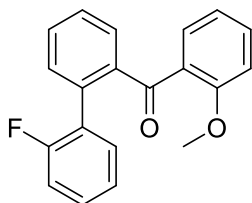



**(2'-Fluoro-[1,1'-biphenyl]-2-yl)(2-methoxyphenyl)methanone (1i)**<sup>1</sup>: Yellow liquid, 1.54 g, 95% yield. <sup>1</sup>H NMR (400 MHz, Chloroform-*d*) δ 7.62 (dd, *J* = 7.6, 1.5 Hz, 1H), 7.54 – 7.48 (m, 1H), 7.44 – 7.33 (m, 3H), 7.28 – 7.23 (m, 1H), 7.20 – 7.07 (m, 2H), 7.02 – 6.95 (m, 1H), 6.86 – 6.77 (m, 2H), 6.68 (d, *J* = 8.4, 1.0 Hz, 1H), 3.57 (s, 3H). <sup>13</sup>C NMR (101 MHz, Chloroform-*d*) δ 196.9, 159.0 (d, *J* = 247.4 Hz), 158.0, 140.6, 135.0, 132.9, 131.4 (d, *J* = 4.0 Hz), 130.9, 130.7, 130.5, 129.2, 129.0 (d, *J* = 8.1 Hz), 128.3, 128.2 (d, *J* = 16.2 Hz), 127.5, 123.5 (d, *J* = 3.0 Hz), 119.9, 115.0 (d, *J* = 21.2 Hz), 111.0, 55.3. <sup>19</sup>F NMR (376 MHz, Chloroform-*d*) δ -115.9. HRMS (ESI-TOF) *m/z*: [M+H]<sup>+</sup> Calcd for C<sub>20</sub>H<sub>16</sub>FO<sub>2</sub><sup>+</sup> = 307.1129; Found 307.1127.

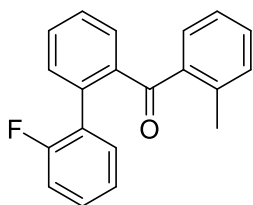

**(2'-Fluoro-[1,1'-biphenyl]-2-yl)(*o*-tolyl)methanone (1j)**<sup>1</sup>: White solid, 0.63 g, 75% yield. <sup>1</sup>H NMR (600 MHz, Chloroform-*d*) δ 7.56 (t, *J* = 7.2 Hz, 2H), 7.44 (t, *J* = 7.6 Hz, 1H), 7.39 (d, *J* = 7.6 Hz, 1H), 7.28 (d, *J* = 7.7 Hz, 1H), 7.24 – 7.19 (m, 2H), 7.18 – 7.13 (m, 1H), 7.10 – 7.03 (m, 3H), 6.87 (t, 1H), 2.38 (s, 3H). <sup>13</sup>C NMR (101 MHz, Chloroform-*d*) δ 199.3, 158.9 (d, *J* = 246.4 Hz), 140.1, 138.7, 137.7, 135.6, 131.1, 131.0, 131.0, 131.0, 130.7, 129.9, 129.3 (d, *J* = 7.1 Hz), 128.4, 128.2, 127.7, 124.9, 123.9 (d, *J* = 4.0 Hz), 115.2 (d, *J* = 22.2 Hz), 20.4. <sup>19</sup>F NMR (376 MHz, Chloroform-*d*) δ -115.6. HRMS (ESI-TOF) *m/z*: [M+H]<sup>+</sup> Calcd for C<sub>20</sub>H<sub>16</sub>FO<sup>+</sup> = 291.1180; Found 291.1177.

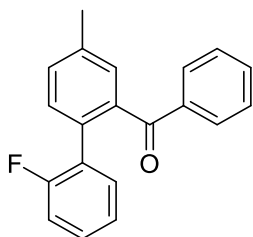

**(2'-Fluoro-4-methyl-[1,1'-biphenyl]-2-yl)(phenyl)methanone (1k)**<sup>1</sup>: White solid, 0.63 g, 95% yield. <sup>1</sup>H NMR (400 MHz, Chloroform-*d*) δ 7.69 (d, 2H), 7.45 – 7.36 (m, 2H), 7.30 (t, *J* = 8.4, 7.1 Hz, 2H), 7.20 (td, *J* = 7.6, 1.9 Hz, 1H), 7.15 – 7.05 (m, 3H), 7.00 (t, *J* = 7.5, 1.2 Hz, 1H), 6.86 (t, *J* = 9.7, 8.2, 1.2 Hz, 1H), 3.85 (s, 3H). <sup>13</sup>C NMR (101 MHz, Chloroform-*d*) δ 197.4, 159.1 (d, *J* = 242.4 Hz), 158.8, 140.1, 137.0, 132.7, 132.2, 131.5 (d, *J* = 3.0 Hz), 129.9, 129.0 (d, *J* = 8.1 Hz), 128.0, 127.6, 127.5, 127.4, 123.9 (d, *J* = 4.0 Hz), 116.3, 115.4, 115.2, 114.3, 55.5. <sup>19</sup>F NMR (376 MHz, ) δ -115.8. HRMS (ESI-TOF) *m/z*: [M+H]<sup>+</sup> Calcd for C<sub>20</sub>H<sub>16</sub>FO<sup>+</sup> = 291.1180; Found 291.1179.

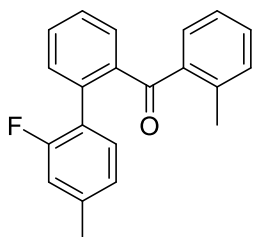

**(2'-Fluoro-4'-methyl-[1,1'-biphenyl]-2-yl)(*o*-tolyl)methanone (1l)**<sup>1</sup>: Colorless oil, 0.63 g, 80% yield. <sup>1</sup>H NMR (400 MHz, Chloroform-*d*) δ 7.58 – 7.50 (m, 2H), 7.43 – 7.37 (m, 2H), 7.30 (d, *J* = 7.7, 1.3 Hz, 1H), 7.28 – 7.21 (m, 1H), 7.14 – 7.04 (m, 3H), 6.88 (d, *J* = 7.7, 1.7, 0.8 Hz, 1H), 6.71 (d, *J* = 10.6, 1.4 Hz, 1H), 2.39 (s, 3H), 2.27 (s, 3H). <sup>13</sup>C NMR (151 MHz, Chloroform-*d*) δ 199.4, 158.8 (d, *J* = 246.1 Hz), 140.1, 139.8 (d, *J* = 7.6 Hz), 138.8, 137.7, 135.8, 131.3, 131.2, 131.0 (d, *J* = 6.0 Hz), 130.9, 130.7 (d, *J* = 4.5 Hz), 130.0, 127.4, 125.3, 125.2, 124.9, 124.7 (d, *J* = 3.0 Hz), 115.8 (d, *J* = 22.6 Hz), 21.0, 20.5. <sup>19</sup>F NMR (376 MHz, Chloroform-*d*) δ -116.7. HRMS (ESI-TOF) *m/z*: [M+H]<sup>+</sup> Calcd for C<sub>21</sub>H<sub>18</sub>OF<sup>+</sup> = 305.1336; Found 305.1336.

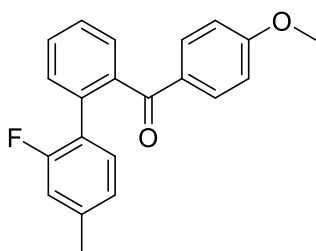

**(2'-Fluoro-4'-methyl-[1,1'-biphenyl]-2-yl)(4-methoxyphenyl)methanone (1m)<sup>1</sup>:**

Yellow solid, 0.61 g, 76% yield. <sup>1</sup>H NMR (400 MHz, Chloroform-*d*) δ 7.72 (d, *J* = 8.9 Hz, 2H), 7.57 – 7.41 (m, 4H), 7.13 (t, *J* = 7.9 Hz, 1H), 6.88 – 6.79 (m, 3H), 6.74 (d, 1H), 3.82 (s, 3H), 2.27 (s, 3H). <sup>13</sup>C NMR (101 MHz, Chloroform-*d*) δ 196.3, 163.3, 158.9 (d, *J* = 247.4 Hz), 139.9, 139.8, 139.5, 135.0, 132.4, 131.1, 131.0, 130.1, 130.0, 128.7, 127.1, 124.9, 124.8 (d, *J* = 3.0 Hz), 116.0, 115.8, 113.3, 55.4, 21.0. <sup>19</sup>F NMR (376 MHz, Chloroform-*d*) δ -117.0. HRMS (ESI-TOF) *m/z*: [M+H]<sup>+</sup> Calcd for C<sub>21</sub>H<sub>18</sub>FO<sub>2</sub><sup>+</sup> = 321.1285; Found 321.1284.

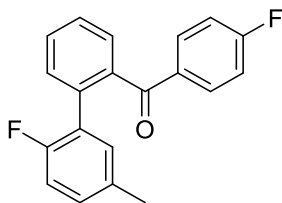

**(2'-Fluoro-5'-methyl-[1,1'-biphenyl]-2-yl)(4-fluorophenyl)methanone (1n)<sup>1</sup>:**

White solid, 0.37 g, 50% yield. <sup>1</sup>H NMR (400 MHz, Chloroform-*d*) δ 7.80 – 7.67 (m, 2H), 7.62 – 7.43 (m, 4H), 7.10 – 6.92 (m, 4H), 6.78 (t, *J* = 9.9, 8.4 Hz, 1H), 2.26 (s, 3H). <sup>13</sup>C NMR (101 MHz, Chloroform-*d*) δ 196.2, 165.4 (d, *J* = 256.5 Hz), 157.2 (d, *J* = 244.4 Hz), 138.9, 135.4, 133.8, 133.6 (d, *J* = 4.0 Hz), 132.5 (d, *J* = 9.1 Hz), 131.8 (d, *J* = 3.0 Hz), 131.1, 130.7, 130.0 (d, *J* = 8.1 Hz), 129.0, 127.5, 127.3 (d, *J* = 16.2 Hz), 115.2 (d, *J* = 8.1 Hz), 115.0 (d, *J* = 8.1 Hz), 20.6. <sup>19</sup>F NMR (376 MHz, Chloroform-*d*) δ -105.7, -121.4. HRMS (ESI-TOF) *m/z*: [M+H]<sup>+</sup> Calcd for C<sub>20</sub>H<sub>15</sub>F<sub>2</sub>O<sup>+</sup> = 309.1085; Found 309.1085.

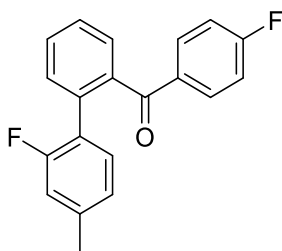

**(2'-Fluoro-4'-methyl-[1,1'-biphenyl]-2-yl)(4-fluorophenyl)methanone (1o)<sup>1</sup>**: White solid, 0.37 g, 93% yield. **<sup>1</sup>H NMR** (400 MHz, Chloroform-*d*)  $\delta$  7.77 – 7.69 (m, 2H), 7.61 – 7.54 (m, 1H), 7.54 – 7.41 (m, 3H), 7.12 (t,  $J = 7.9$  Hz, 1H), 7.04 – 6.95 (m, 2H), 6.87 (d, 1H), 6.73 (d,  $J = 11.2, 1.6$  Hz, 1H), 2.27 (s, 3H). **<sup>13</sup>C NMR** (101 MHz, Chloroform-*d*)  $\delta$  196.2, 165.5 (d,  $J = 255.5$  Hz), 158.8 (d,  $J = 246.4$  Hz), 140.2 (d,  $J = 8.1$  Hz), 138.9, 135.3, 133.7 (d,  $J = 3.0$  Hz), 132.6 (d,  $J = 9.1$  Hz), 131.2, 131.1 (d,  $J = 4.0$  Hz), 130.6, 128.9, 127.4, 124.9 (d,  $J = 3.0$  Hz), 124.7 (d,  $J = 15.2$  Hz), 116.0 (d,  $J = 22.2$  Hz), 115.2 (d,  $J = 22.2$  Hz), 21.1. **<sup>19</sup>F NMR** (376 MHz, Chloroform-*d*)  $\delta$  -105.6, -117.0. **HRMS** (ESI-TOF)  $m/z$ :  $[M+H]^+$  Calcd for C<sub>20</sub>H<sub>15</sub>F<sub>2</sub>O<sup>+</sup> = 309.1085; Found 309.1083.

### 3. General Procedure of Asymmetric Hydrogenation

General procedure: To a 4.0 mL vial was added the catalyst precursor  $[\text{Ir}(\text{COD})\text{Cl}]_2$  (6.7 mg, 0.01 mmol), f-phamidol (**L1**) (11.6 mg, 0.02 mmol) and anhydrous THF (1.0 mL) under argon atmosphere. The mixture was stirred for 2.0 h at 25 °C giving orange red solution in the argon-filled glovebox. The resulting solution (100  $\mu\text{L}$ ) transferred by syringe into a 5.0 mL vial charged with fresh distilled substrate  $\alpha$ -aminoketones (0.2 mmol) and NaOMe (0.4 mmol, 21.6 mg, 2 equiv) in 2.0 mL anhydrous THF. The vials were transferred to an autoclave, which was then charged with 50 atm of  $\text{H}_2$ , stirred at room temperature for 12 h and further stirred at 80 °C for 4 h. The hydrogen gas was released slowly in a well-ventilated hood and the solution was concentrated and passed through a short column of silica gel to get the product. The product was analyzed by chiral HPLC for ee values.

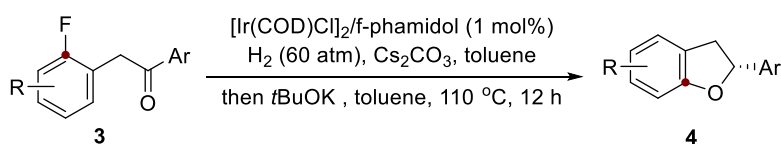

To a 10.0 mL vial equipped with a magnetic stir bar was added  $[\text{Ir}(\text{COD})_2\text{Cl}]_2$  (6.7 mg, 0.01 mmol) and f-phamidol (**L1**) (11.6 mg, 0.02 mmol) in dry toluene (10.0 mL) in an argon-filled glovebox. An Ir/f-phamidol-precatalyst solution (0.001 M) was formed after stirring for 30 min. To a 4.0 mL vial equipped with a magnetic stir bar was added ketones **3** (0.2 mmol, 1.0 eq.) and  $\text{Cs}_2\text{CO}_3$  (195.5 mg, 0.6 mmol, 3.0 eq.) in an argon-filled glovebox. Then, a solution of Ir/f-phamidol-precatalyst (0.001 M, 1.0 mL) was added into the 4.0 mL vial, followed dried toluene (1.0 mL). The vial was transferred into the autoclave. The autoclave was quickly purged with hydrogen gas for three times, and then pressurized to 60 atm  $\text{H}_2$ . The reaction solution was stirred at room temperature for 48 h, and then the pressure was released carefully. Next, *t*BuOK (44.9 mg, 0.4 mmol) was

added into the system. The reaction was then heated to 110 °C for 12 h under Ar atmosphere. After that, the reaction system was cooled to room temperature and diluted with EtOAc (2.0 mL). Then, the solvent was removed under reduced pressure. The crude product was purified by flash chromatography on silica gel (silica: 200–300 mesh, eluent: petroleum ether) to afford the corresponding pure product **4**.

### 3.1 Characterization Data of Products

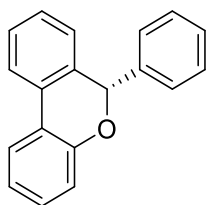

**(S)-6-phenyl-6H-benzo[c]chromene (2a)**<sup>1</sup>: Colorless liquid, 51 mg, 99% yield, 96% ee;  $[\alpha]_D^{20} = +30.6$  ( $c = 0.5$ ,  $\text{CHCl}_3$ ); **HPLC** (Chiralpak OD-3 column, hexane/isopropanol = 95/5; flow rate = 1.0 mL/min; UV detection at 220 nm;  $t_1 = 8.7$  min (minor),  $t_2 = 9.6$  min (major)). **<sup>1</sup>H NMR** (600 MHz, Chloroform-*d*)  $\delta$  7.76 (t,  $J = 8.2$  Hz, 2H), 7.42 – 7.31 (m, 6H), 7.26 – 7.19 (m, 2H), 7.07 – 6.97 (m, 2H), 6.85 (d,  $J = 7.6$  Hz, 1H), 6.16 (s, 1H). **<sup>13</sup>C NMR** (151 MHz, Chloroform-*d*)  $\delta$  153.6, 139.6, 134.0, 130.1, 129.6, 128.5, 128.5, 128.4, 128.2, 127.6, 126.3, 123.1, 122.8, 122.1, 117.9, 79.7.

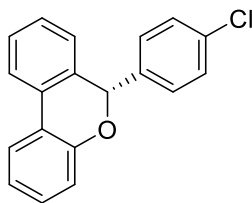

**(S)-6-(4-chlorophenyl)-6H-benzo[c]chromene (2b)**: Yellow solid, 58 mg, 99% yield, 85% ee;  $[\alpha]_D^{20} = +12.6$  ( $c = 1.0$ ,  $\text{CHCl}_3$ ); **HPLC** (Chiralpak OJ-3 column, hexane/isopropanol = 95/5; flow rate = 1.0 mL/min; UV detection at 220 nm;  $t_1 = 13.4$  min (major),  $t_2 = 15.8$  min (minor)). **<sup>1</sup>H NMR** (600 MHz, Chloroform-*d*)  $\delta$  7.77 – 7.70 (m,

2H), 7.39 (t,  $J = 7.6, 1.3$  Hz, 1H), 7.28 (t,  $J = 2.1$  Hz, 4H), 7.25 – 7.18 (m, 2H), 7.02 (t,  $J = 7.5, 1.2$  Hz, 1H), 6.97 (d,  $J = 8.1, 1.3$  Hz, 1H), 6.84 (d,  $J = 7.6$  Hz, 1H), 6.12 (s, 1H).  $^{13}\text{C}$  NMR (151 MHz, Chloroform- $d$ )  $\delta$  153.2, 138.1, 134.2, 133.3, 129.9, 129.7, 129.4, 128.6, 128.6, 127.7, 126.1, 123.1, 122.6, 122.2 (d,  $J = 4.5$  Hz), 117.9, 78.7.

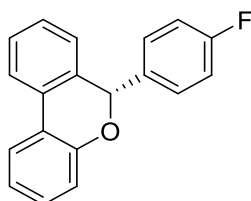

**(S)-6-(4-fluorophenyl)-6H-benzo[c]chromene (2c)**: Yellow solid, 55 mg, 99% yield, 95% ee;  $[\alpha]_{\text{D}}^{20} = +21.6$  ( $c = 1.45$ ,  $\text{CHCl}_3$ ); **HPLC** (Chiralpak OJ-3 column, hexane/isopropanol = 95/5; flow rate = 1.0 mL/min; UV detection at 220 nm;  $t_1 = 14.4$  min (minor),  $t_2 = 15.3$  min (major)).  $^1\text{H}$  NMR (400 MHz, Chloroform- $d$ )  $\delta$  7.74 (t,  $J = 8.1, 1.4$  Hz, 2H), 7.42 – 7.27 (m, 3H), 7.27 – 7.16 (m, 2H), 7.05 – 6.95 (m, 4H), 6.83 (d, 1H), 6.13 (s, 1H).  $^{13}\text{C}$  NMR (101 MHz, Chloroform- $d$ )  $\delta$  162.6 (d,  $J = 247.4$  Hz), 153.3, 135.4 (d,  $J = 3.0$  Hz), 133.6, 130.0, 129.9 (d,  $J = 8.1$  Hz), 129.6, 128.6, 127.6, 126.1, 123.1, 122.7, 122.2 (d,  $J = 2.0$  Hz), 117.9, 115.4, 115.2, 78.8.  $^{19}\text{F}$  NMR (376 MHz, Chloroform- $d$ )  $\delta$  -113.5. **HRMS** (ESI-TOF)  $m/z$ :  $[\text{M}+\text{H}]^+$  Calcd for  $\text{C}_{19}\text{H}_{14}\text{FO}^+ = 277.1023$ ; Found 277.1020.

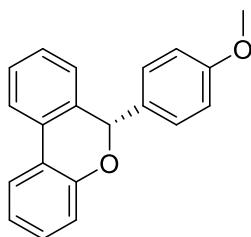

**(S)-6-(4-methoxyphenyl)-6H-benzo[c]chromene (2d)**<sup>2</sup>: Yellow oil, 56 mg, 98% yield, 89% ee;  $[\alpha]_{\text{D}}^{20} = +14.0$  ( $c = 1.0$ ,  $\text{CHCl}_3$ ); **HPLC** (Chiralpak OJ-3 column, hexane/isopropanol = 70/30; flow rate = 1.0 mL/min; UV detection at 220 nm;  $t_1 = 16.2$  min (major),  $t_2 = 20.0$  min (minor)).  $^1\text{H}$  NMR (400 MHz, Chloroform- $d$ )  $\delta$  7.76 (t,  $J = 7.5$ ,

5.8, 1.4 Hz, 2H), 7.39 (t,  $J = 7.7, 1.3$  Hz, 1H), 7.29 (d, 2H), 7.24 – 7.18 (m, 2H), 7.03 (t,  $J = 7.5, 1.2$  Hz, 1H), 6.97 (d,  $J = 8.0, 1.2$  Hz, 1H), 6.90 – 6.84 (m, 3H), 6.13 (s, 1H), 3.79 (s, 3H).  $^{13}\text{C}$  NMR (101 MHz, Chloroform-*d*)  $\delta$  159.6, 153.6, 134.2, 131.7, 130.1, 129.5, 129.5, 128.4, 127.6, 126.2, 123.0, 122.8, 122.0, 122.0, 117.9, 113.8, 79.3, 55.2.

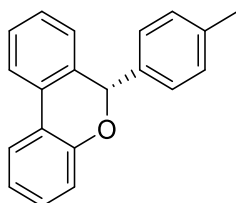

**(S)-6-(p-tolyl)-6H-benzo[c]chromene (2e)<sup>2</sup>**: White solid, 54 mg, 99% yield, 96% ee;  $[\alpha]_{\text{D}}^{20} = +23.6$  ( $c = 1.0$ ,  $\text{CHCl}_3$ ); **HPLC** (Chiralpak OD-3 column, hexane/isopropanol = 90/10; flow rate = 1.0 mL/min; UV detection at 220 nm;  $t_1 = 5.6$  min (major),  $t_2 = 6.2$  min (minor).  $^1\text{H}$  NMR (400 MHz, Chloroform-*d*)  $\delta$  7.77 – 7.71 (m, 2H), 7.37 (t,  $J = 7.6, 1.3$  Hz, 1H), 7.28 – 7.12 (m, 7H), 7.05 – 6.95 (m, 2H), 6.85 (d,  $J = 7.7, 0.9$  Hz, 1H), 6.12 (s, 1H), 2.33 (s, 3H).  $^{13}\text{C}$  NMR (101 MHz, Chloroform-*d*)  $\delta$  153.6, 138.1, 136.6, 134.1, 130.0, 129.5, 129.1, 128.3, 128.1, 127.5, 126.2, 123.0, 122.7, 122.0, 122.0, 117.9, 79.5, 21.2.

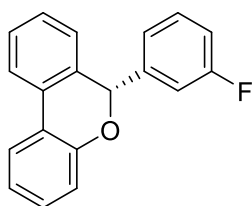

**(S)-6-(3-fluorophenyl)-6H-benzo[c]chromene (2f)**: Yellow oil, 54 mg, 99% yield, 65% ee;  $[\alpha]_{\text{D}}^{20} = -0.93$  ( $c = 1.0$ ,  $\text{CHCl}_3$ ); **HPLC** (Chiralpak OJ-3 column, hexane/isopropanol = 95/5; flow rate = 1.0 mL/min; UV detection at 220 nm;  $t_1 = 13.5$  min (major),  $t_2 = 16.0$  min (minor).  $^1\text{H}$  NMR (400 MHz, Chloroform-*d*)  $\delta$  7.79 – 7.70 (m, 2H), 7.40 (t,  $J = 7.6, 1.3$  Hz, 1H), 7.32 – 7.18 (m, 3H), 7.13 (d,  $J = 7.7, 1.2$  Hz, 1H), 7.10 – 6.95 (m, 4H), 6.88 (d,  $J = 7.6$  Hz, 1H), 6.14 (s, 1H).  $^{13}\text{C}$  NMR (101 MHz, Chloroform-*d*)  $\delta$  162.8 (d,  $J = 247.4$  Hz), 153.2, 142.2 (d,  $J = 7.1$  Hz), 133.1, 129.9 (d,  $J = 8.1$  Hz), 129.7, 128.7, 127.7,



126.1, 123.6 (d,  $J = 2.0$  Hz), 123.1, 122.6, 122.3, 122.2, 117.9, 115.3, 115.1 (d,  $J = 3.0$  Hz), 114.9, 78.7 (d,  $J = 2.0$  Hz).  **$^{19}\text{F}$  NMR** (376 MHz, Chloroform- $d$ )  $\delta$  -112.6. **HRMS** (ESI-TOF)  $m/z$ :  $[\text{M}+\text{H}]^+$  Calcd for  $\text{C}_{19}\text{H}_{14}\text{FO}^+$  = 277.1023; Found 277.1021.

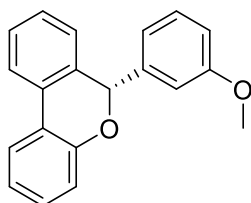

**(S)-6-(3-methoxyphenyl)-6H-benzo[c]chromene (2g)**<sup>2</sup>: Yellow oil, 57 mg, 99% yield, 90% ee;  $[\alpha]_{\text{D}}^{20} = + 21.27$  ( $c = 1.45$ ,  $\text{CHCl}_3$ ); **HPLC** (Chiralpak OJ-3 column, hexane/isopropanol = 70/30; flow rate = 1.0 mL/min; UV detection at 220 nm;  $t_1 = 18.4$  min (major),  $t_2 = 23.2$  min (minor).  **$^1\text{H}$  NMR** (600 MHz, Chloroform- $d$ )  $\delta$  7.74 (t,  $J = 7.5$ , 5.4, 1.3 Hz, 2H), 7.38 (t,  $J = 7.6$ , 1.3 Hz, 1H), 7.28 – 7.19 (m, 3H), 7.06 – 6.98 (m, 2H), 6.95 (d,  $J = 5.0$ , 2.8 Hz, 2H), 6.86 (t, 2H), 6.12 (s, 1H), 3.74 (s, 3H).  **$^{13}\text{C}$  NMR** (151 MHz, Chloroform- $d$ )  $\delta$  159.7, 153.6, 141.0, 133.8, 129.9, 129.6, 129.4, 128.4, 127.6, 126.2, 123.1, 122.7, 122.1, 122.0, 120.5, 117.8, 113.9, 113.5, 79.5, 55.2.

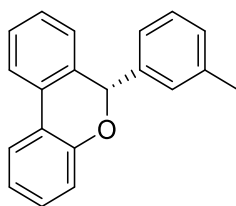

**(S)-6-(m-tolyl)-6H-benzo[c]chromene (2h)**: Yellow solid, 54 mg, 99% yield, 96% ee;  $[\alpha]_{\text{D}}^{20} = + 13.2$  ( $c = 1.45$ ,  $\text{CHCl}_3$ ); **HPLC** (Chiralpak OJ-3 column, hexane/isopropanol = 97/3; flow rate = 1.0 mL/min; UV detection at 220 nm;  $t_1 = 19.9$  min (major),  $t_2 = 22.5$  min (minor).  **$^1\text{H}$  NMR** (400 MHz, Chloroform- $d$ )  $\delta$  7.73 (d,  $J = 7.7$ , 1.8 Hz, 2H), 7.36 (t,  $J = 7.6$ , 1.3 Hz, 1H), 7.25 – 7.10 (m, 7H), 7.05 – 6.97 (m, 2H), 6.81 (d,  $J = 7.6$  Hz, 1H), 6.09 (s, 1H), 2.32 (s, 3H).  **$^{13}\text{C}$  NMR** (101 MHz, Chloroform- $d$ )  $\delta$  153.7, 139.4, 138.1, 134.1, 130.0, 129.5, 129.2, 128.8, 128.4, 128.3, 127.5, 126.2, 125.3, 123.1, 122.7, 122.0,

122.0, 117.8, 79.8, 21.4. **HRMS** (ESI-TOF)  $m/z$ :  $[M+H]^+$  Calcd for  $C_{20}H_{17}O^+$  = 273.1274; Found 273.1269.

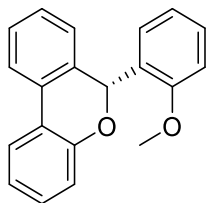

**(R)-6-(2-methoxyphenyl)-6H-benzo[c]chromene (2i)**: White solid, 57 mg, 99% yield, 68% ee;  $[\alpha]_D^{20}$  = -13.7 (c = 1.0,  $CHCl_3$ ); **HPLC** (Chiralpak OJ-3 column, hexane/isopropanol = 95/5; flow rate = 1.0 mL/min; UV detection at 220 nm;  $t_1$  = 12.1 min (major),  $t_2$  = 14.7 min (minor).  **$^1H$  NMR** (400 MHz, Chloroform-*d*)  $\delta$  7.77 (t, 2H), 7.39 – 7.29 (m, 3H), 7.24 – 7.16 (m, 2H), 7.06 (t,  $J$  = 7.6, 1.3 Hz, 1H), 7.01 – 6.91 (m, 3H), 6.76 (d, 1H), 6.63 (s, 1H), 3.87 (s, 3H).  **$^{13}C$  NMR** (101 MHz, Chloroform-*d*)  $\delta$  157.1, 154.3, 134.2, 130.4, 129.5, 129.4, 129.0, 128.1, 127.8, 127.7, 125.8, 123.1, 122.9, 121.9, 121.8, 120.9, 117.7, 110.6, 73.5, 55.6. **HRMS** (ESI-TOF)  $m/z$ :  $[M+H]^+$  Calcd for  $C_{20}H_{17}O_2^+$  = 289.1223; Found 289.1218.

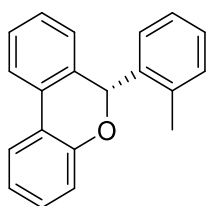

**(S)-6-(o-tolyl)-6H-benzo[c]chromene (2j)**: Brown oil, 54 mg, 99% yield, 94% ee;  $[\alpha]_D^{20}$  = -1.6 (c = 1.0,  $CHCl_3$ ); **HPLC** (Chiralpak OJ-3 column, hexane/isopropanol = 95/5; flow rate = 1.0 mL/min; UV detection at 220 nm;  $t_1$  = 8.9 min (major),  $t_2$  = 11.0 min (minor).  **$^1H$  NMR** (400 MHz, Chloroform-*d*)  $\delta$  7.79 – 7.74 (m, 2H), 7.37 (t,  $J$  = 7.6, 1.3 Hz, 1H), 7.28 – 7.22 (m, 3H), 7.22 – 7.14 (m, 3H), 7.05 (t,  $J$  = 7.5, 1.3 Hz, 1H), 6.97 (d,  $J$  = 8.0, 1.3 Hz, 1H), 6.67 (d,  $J$  = 7.6, 1.1 Hz, 1H), 6.31 (s, 1H), 2.40 (s, 3H).  **$^{13}C$  NMR** (101 MHz, Chloroform-*d*)  $\delta$  154.1, 137.1, 137.0, 133.8, 130.7, 130.5, 129.5, 128.7, 128.4,

128.4, 127.7, 126.1, 125.6, 123.1, 122.9, 122.1, 122.0, 117.6, 77.7, 19.6. **HRMS** (ESI-TOF)  $m/z$ :  $[M+H]^+$  Calcd for  $C_{20}H_{18}O^+$  = 273.1274; Found 273.1268.

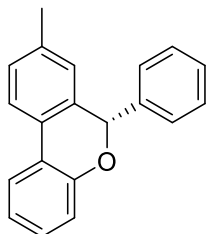

**(S)-8-methyl-6-phenyl-6H-benzo[c]chromene (2k)**: Yellow solid, 54 mg, 99% yield, 94% ee;  $[\alpha]_D^{20} = +54.67$  ( $c = 1.0$ ,  $CHCl_3$ ); **HPLC** (Chiralpak OD-3 column, hexane/isopropanol = 95/5; flow rate = 1.0 mL/min; UV detection at 220 nm;  $t_1 = 8.4$  min (major),  $t_2 = 9.0$  min (minor).  **$^1H$  NMR** (400 MHz, Chloroform-*d*)  $\delta$  7.67 (t, 2H), 7.47 – 7.23 (m, 5H), 7.15 (t,  $J = 7.8$ , 1.6 Hz, 1H), 7.08 – 6.83 (m, 3H), 6.39 (d,  $J = 2.6$ , 0.8 Hz, 1H), 6.10 (s, 1H), 3.72 (s, 3H).  **$^{13}C$  NMR** (101 MHz, Chloroform-*d*)  $\delta$  159.3, 152.8, 139.4, 135.5, 128.5, 128.5, 128.4, 128.1, 123.5, 122.9, 122.8, 122.4, 122.1, 117.7, 113.7, 111.9, 79.6, 55.2. **HRMS** (ESI-TOF)  $m/z$ :  $[M+H]^+$  Calcd for  $C_{20}H_{17}O^+$  = 273.1274; Found 273.1274.

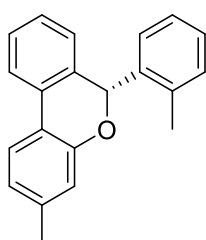

**(S)-3-methyl-6-(o-tolyl)-6H-benzo[c]chromene (2l)**: Colorless oil, 56 mg, 98% yield, 95% ee;  $[\alpha]_D^{20} = -22.5$  ( $c = 1.0$ ,  $CHCl_3$ ); **HPLC** (Chiralpak OJ-3 column, hexane/isopropanol = 90/10; flow rate = 1.0 mL/min; UV detection at 220 nm;  $t_1 = 8.2$  min (major),  $t_2 = 10.0$  min (minor).  **$^1H$  NMR** (400 MHz, Chloroform-*d*)  $\delta$  7.71 (d,  $J = 7.8$ , 1.1 Hz, 1H), 7.64 (d,  $J = 7.9$  Hz, 1H), 7.34 (t,  $J = 7.6$ , 1.2 Hz, 1H), 7.26 – 7.10 (m, 5H), 6.85 (d,  $J = 7.9$ , 1.6 Hz, 1H), 6.79 (s, 1H), 6.66 (d,  $J = 7.6$  Hz, 1H), 6.28 (s, 1H), 2.40 (s,

3H), 2.29 (s, 3H).  $^{13}\text{C NMR}$  (101 MHz, Chloroform-*d*)  $\delta$  154.0, 139.9, 137.2, 137.0, 133.4, 130.7, 128.7, 128.3, 128.3, 127.3, 126.1, 125.6, 123.0, 122.9, 121.7, 120.1, 118.0, 77.7, 21.3, 19.6. **HRMS** (ESI-TOF) *m/z*:  $[\text{M}+\text{H}]^+$  Calcd for  $\text{C}_{21}\text{H}_{19}\text{O}^+$  = 287.1430; Found 287.1426.

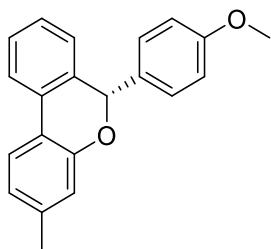

**(S)-6-(4-methoxyphenyl)-3-methyl-6H-benzo[c]chromene (2m)**<sup>2</sup>: Black solid, 59 mg, 98% yield, 92% ee;  $[\alpha]_{\text{D}}^{20} = -0.4$  (*c* = 1.0,  $\text{CHCl}_3$ ); **HPLC** (Chiralpak As-3 column, hexane/isopropanol = 95/5; flow rate = 1.0 mL/min; UV detection at 220 nm;  $t_1 = 5.2$  min (minor),  $t_2 = 6.0$  min (major).  $^1\text{H NMR}$  (400 MHz, Chloroform-*d*)  $\delta$  7.70 (d, *J* = 7.9, 1.2 Hz, 1H), 7.60 (d, *J* = 7.9 Hz, 1H), 7.34 (t, *J* = 7.6, 1.3 Hz, 1H), 7.26 (d, 2H), 7.18 (t, 1H), 6.87 – 6.76 (m, 5H), 6.08 (s, 1H), 3.74 (s, 3H), 2.28 (s, 3H).  $^{13}\text{C NMR}$  (101 MHz, Chloroform-*d*)  $\delta$  159.5, 153.4, 139.9, 133.7, 131.9, 130.2, 129.4, 128.3, 127.1, 126.1, 122.9, 122.8, 121.7, 119.9, 118.2, 113.8, 79.2, 55.2, 21.3.

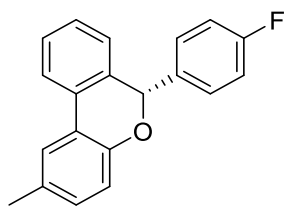

**(S)-6-(4-fluorophenyl)-2-methyl-6H-benzo[c]chromene (2n)**: White solid, 31 mg, 54% yield, 94% ee;  $[\alpha]_{\text{D}}^{20} = +41.5$  (*c* = 1.0,  $\text{CHCl}_3$ ); **HPLC** (Chiralpak AD-3 column, hexane/isopropanol = 95/5; flow rate = 1.0 mL/min; UV detection at 220 nm;  $t_1 = 6.2$  min (minor),  $t_2 = 6.8$  min (major).  $^1\text{H NMR}$  (400 MHz, Chloroform-*d*)  $\delta$  7.81 (d, *J* = 7.8, 1.2 Hz, 1H), 7.59 (s, 1H), 7.48 – 7.33 (m, 3H), 7.29 (t, 1H), 7.13 – 6.99 (m, 3H), 6.97 – 6.82

(m, 2H), 6.15 (s, 1H), 2.39 (s, 3H).  $^{13}\text{C}$  NMR (101 MHz, Chloroform-*d*)  $\delta$  162.6 (d,  $J = 248.5$  Hz), 151.1, 135.5 (d,  $J = 3.0$  Hz), 133.7, 131.4, 130.3, 130.1, 129.9 (d,  $J = 9.1$  Hz), 128.5, 127.5, 126.1, 123.5, 122.3, 122.1, 117.6, 115.3 (d,  $J = 21.2$  Hz), 78.8, 20.9.  $^{19}\text{F}$  NMR (376 MHz, Chloroform-*d*)  $\delta$  -113.7. HRMS (ESI-TOF)  $m/z$ :  $[\text{M}+\text{H}]^+$  Calcd for  $\text{C}_{20}\text{H}_{16}\text{FO}^+$  = 291.1180; Found 291.1176.

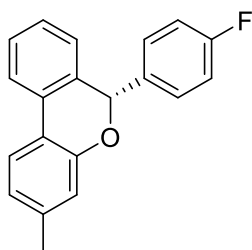

**(S)-6-(4-fluorophenyl)-3-methyl-6H-benzo[c]chromene (2o)**: Yellow solid, 58 mg, 99% yield, 95% ee;  $[\alpha]_{\text{D}}^{20} = +41.5$  ( $c = 1.0$ ,  $\text{CHCl}_3$ ); HPLC (Chiralpak OJ-3 column, hexane/isopropanol = 95/5; flow rate = 1.0 mL/min; UV detection at 220 nm;  $t_1 = 12.5$  min (major),  $t_2 = 21.2$  min (minor).  $^1\text{H}$  NMR (400 MHz, Chloroform-*d*)  $\delta$  7.78 (d,  $J = 7.7$  Hz, 1H), 7.67 (d,  $J = 7.9$  Hz, 1H), 7.46 – 7.34 (m, 3H), 7.29 – 7.23 (m, 1H), 7.07 (t,  $J = 8.7$  Hz, 2H), 6.96 – 6.77 (m, 3H), 6.17 (s, 1H), 2.36 (s, 3H).  $^{13}\text{C}$  NMR (101 MHz, Chloroform-*d*)  $\delta$  162.6 (d,  $J = 247.4$  Hz), 153.2, 140.1, 135.6 (d,  $J = 3.0$  Hz), 133.2, 130.1, 129.9 (d,  $J = 8.1$  Hz), 128.5, 127.2, 126.1, 123.1, 122.9, 121.8, 119.9, 118.3, 115.3 (d,  $J = 22.2$  Hz), 78.8, 21.3.  $^{19}\text{F}$  NMR (376 MHz, Chloroform-*d*)  $\delta$  -113.7. HRMS (ESI-TOF)  $m/z$ :  $[\text{M}+\text{H}]^+$  Calcd for  $\text{C}_{20}\text{H}_{16}\text{FO}^+$  = 291.1180; Found 291.1175.

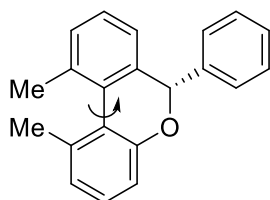

**(S)-1,10-dimethyl-6-phenyl-6H-benzo[c]chromene (2p)**: colorless oil, 52.7 mg, 92% yield, 3:1 d.r., 68% ee;  $[\alpha]_{\text{D}}^{20} = +20.1$  ( $c = 1.0$ ,  $\text{CHCl}_3$ ); HPLC (Chiralpak OJ-3 column, hexane/isopropanol = 95/5; flow rate = 1.0 mL/min; UV detection at 254 nm;  $t_1 = 7.094$

min (minor),  $t_2 = 12.900$  min (major).  **$^1\text{H NMR}$**  (400 MHz,  $\text{CDCl}_3$ )  $\delta$  7.38-7.33 (m, 14H, major+minor), 7.26-6.99 (m, 18H, major+minor), 6.96-6.87 (m, 7H, major, 6H ; minor 1H), 6.74-6.65 (m, 2H, minor), 6.32 (d,  $J = 7.5$  Hz, 3H, major), 6.10 (s, 1H, minor), 5.49 (s, 3H), 2.30 (s, 9H, major), 2.25 (s, 9H, major), 2.24 (s, 3H, minor), 2.15 (s, 3H, minor).  **$^{13}\text{C NMR}$**  (100 MHz,  $\text{CDCl}_3$ )  $\delta$  157.3 (major), 154.5 (minor), 141.0 (major), 138.7 (minor), 138.5 (major), 137.8 (minor), 136.0 (major), 135.5 (minor), 135.4 (minor), 134.3 (major), 131.2 (minor), 131.0 (major), 130.5 (major), 130.1 (minor), 128.5 (major), 128.4 (minor), 128.3 (major), 128.1 (minor), 127.9 (major), 127.8 (major+minor), 127.6 (minor), 126.6 (minor), 126.4 (major), 124.9 (minor), 124.7 (major), 124.5 (major), 124.3 (minor), 123.7 (minor), 122.3 (major), 115.4 (minor), 113.8 (major). **HRMS** (ESI-TOF)  $m/z$ :  $[\text{M}+\text{H}]^+$  Calcd for  $\text{C}_{21}\text{H}_{19}\text{O}^+$  = 287.1430; Found 287.1440.

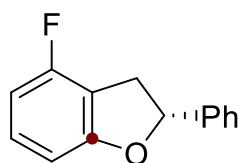

**(R)-4-fluoro-2-phenyl-2,3-dihydrobenzofuran (4a)**

Colorless oil, 40.3 mg, 94% yield, 99% ee.  $[\alpha]_{\text{D}}^{20} = +3.80$  ( $c = 0.50$ ,  $\text{CHCl}_3$ ). **HPLC**: The ee was determined by chiral HPLC (Chiralpak OD-3, n-hexane/isopropanol 98:2 v/v, flow rate 1.0 mL/min,  $\lambda = 254$  nm, 25 °C). Retention times:  $t_{\text{R}} = 6.094$  min (major),  $t_{\text{R}} = 9.415$  min (minor).  **$^1\text{H NMR}$**  (400 MHz,  $\text{CDCl}_3$ )  $\delta$  (ppm) 7.41-7.36 (m, 4H), 7.36-7.29 (m, 1H), 7.16-7.07 (m, 1H), 6.66 (d,  $J = 8.0$  Hz, 1H), 6.59 (t,  $J = 8.4$  Hz, 1H), 5.80 (dd,  $J = 9.3, 8.2$  Hz, 1H), 3.66 (dd,  $J = 15.8, 9.5$  Hz, 1H), 3.22 (dd,  $J = 15.8, 8.0$  Hz, 1H).  **$^{13}\text{C NMR}$**  (100 MHz,  $\text{CDCl}_3$ )  $\delta$  (ppm) 161.9 (d,  $J = 8.7$  Hz), 159.3 (d,  $J = 247.1$  Hz), 141.3, 129.6 (d,  $J = 8.8$  Hz), 128.7, 128.2, 125.7, 112.9 (d,  $J = 21.5$  Hz), 107.7 (d,  $J = 20.3$  Hz), 105.3 (d,  $J = 4.5$  Hz), 84.9, 35.0.  **$^{19}\text{F NMR}$**  (376 MHz,  $\text{CDCl}_3$ )  $\delta$  (ppm) -116.80. **HRMS** (ESI)  $m/z$ : calcd for  $\text{C}_{14}\text{H}_{10}\text{FO}^-$   $[\text{M}-\text{H}]^-$ : 213.0721, found: 213.0714.

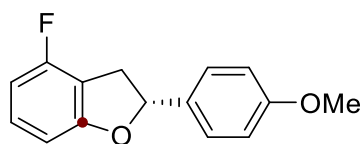

**(R)-4-fluoro-2-(4-methoxyphenyl)-2,3-dihydrobenzofuran (4b)**

Colorless oil, 45.4 mg, 93% yield, 98% ee.  $[\alpha]_D^{20} = -49.00$  ( $c = 0.50$ ,  $\text{CHCl}_3$ ). **HPLC:** The ee was determined by chiral HPLC (Chiralpak OD-3, n-hexane/isopropanol 98:2 v/v, flow rate 1.0 mL/min,  $\lambda = 254$  nm, 25 °C). Retention times:  $t_R = 7.592$  min (major),  $t_R = 9.840$  min (minor).  **$^1\text{H NMR}$**  (400 MHz,  $\text{CDCl}_3$ )  $\delta$  (ppm) 7.35-7.30 (m, 2H), 7.15-7.07 (m, 1H), 6.94-6.88 (m, 2H), 6.63 (d,  $J = 8.0$  Hz, 1H), 6.59 (t,  $J = 8.4$  Hz, 1H), 5.82-5.72 (m, 1H), 3.81 (s, 3H), 3.63 (dd,  $J = 15.8, 9.4$  Hz, 1H), 3.23 (dd,  $J = 15.8, 8.2$  Hz, 1H).  **$^{13}\text{C NMR}$**  (100 MHz,  $\text{CDCl}_3$ )  $\delta$  (ppm) 161.8 (d,  $J = 8.2$  Hz), 159.6, 159.3 (d,  $J = 246.5$  Hz), 133.1, 129.6 (d,  $J = 8.8$  Hz), 127.3, 114.1, 113.1 (d,  $J = 20.8$  Hz), 107.6 (d,  $J = 21.1$  Hz), 105.3 (d,  $J = 3.6$  Hz), 84.9, 55.3, 34.8.  **$^{19}\text{F NMR}$**  (376 MHz,  $\text{CDCl}_3$ )  $\delta$  (ppm) -116.89. **HRMS** (ESI)  $m/z$ : calcd for  $\text{C}_{15}\text{H}_{14}\text{FO}_2^+$   $[\text{M}+\text{H}]^+$ :245.0972, found: 245.0974.

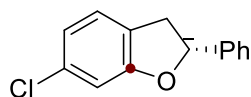

**(R)-6-chloro-2-phenyl-2,3-dihydrobenzofuran (4c)**

Colorless oil, 42.9 mg, 93% yield, 96% ee.  $[\alpha]_D^{20} = -46.80$  ( $c = 0.50$ ,  $\text{CHCl}_3$ ). **HPLC:** The ee was determined by chiral HPLC (Chiralpak OD-3, n-hexane/isopropanol 99:1 v/v, flow rate 1.0 mL/min,  $\lambda = 220$  nm, 25 °C). Retention times:  $t_R = 8.344$  min (major),  $t_R = 8.955$  min (minor).  **$^1\text{H NMR}$**  (400 MHz,  $\text{CDCl}_3$ )  $\delta$  (ppm) 7.38-7.34 (m, 4H), 7.34-7.27 (m, 1H), 7.09-7.03 (m, 1H), 6.84 (d,  $J = 7.1$  Hz, 2H), 5.77 (dd,  $J = 9.4, 8.1$  Hz, 1H), 3.57 (dd,  $J = 15.7, 9.5$  Hz, 1H), 3.14 (dd,  $J = 15.7, 8.0$  Hz, 1H).  **$^{13}\text{C NMR}$**  (100 MHz,  $\text{CDCl}_3$ )  $\delta$  (ppm) 160.4, 141.4, 133.4, 128.7, 128.2, 125.7, 125.3, 125.2, 120.7, 110.1, 85.0, 37.7. **HRMS** (ESI)  $m/z$ : calcd for  $\text{C}_{14}\text{H}_{10}\text{ClO}^-$   $[\text{M}-\text{H}]^-$ :229.0426, found: 229.0419.

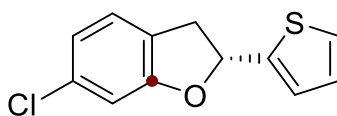

**(R)-6-chloro-2-(thiophen-2-yl)-2,3-dihydrobenzofuran (4d)**

Colorless oil, 43.5 mg, 92% yield, 98% ee.  $[\alpha]_D^{20} = +61.60$  ( $c = 0.50$ ,  $\text{CHCl}_3$ ). **HPLC:** The ee was determined by chiral HPLC (Chiralpak OD-3, n-hexane/isopropanol 98:2 v/v, flow rate 1.0 mL/min,  $\lambda = 254$  nm, 25 °C). Retention times:  $t_R = 7.940$  min (major),  $t_R = 9.216$  min (minor).  **$^1\text{H NMR}$**  (400 MHz,  $\text{CDCl}_3$ )  $\delta$  (ppm) 7.30 (dd,  $J = 5.1, 1.2$  Hz, 1H), 7.12-7.08 (m, 2H), 6.99 (dd,  $J = 5.1, 3.5$  Hz, 1H), 6.86 (dd,  $J = 7.9, 1.8$  Hz, 1H), 6.82 (d,  $J = 1.8$  Hz, 1H), 6.03-5.97 (m, 1H), 3.59 (dd,  $J = 15.8, 9.2$  Hz, 1H), 3.32 (ddd,  $J = 15.7, 7.8, 0.9$  Hz, 1H).  **$^{13}\text{C NMR}$**  (100 MHz,  $\text{CDCl}_3$ )  $\delta$  (ppm) 159.7, 143.9, 133.6, 126.8, 125.8, 125.4, 125.2, 124.9, 120.9, 110.4, 80.9, 37.8. **HRMS** (ESI)  $m/z$ : calcd for  $\text{C}_{12}\text{H}_{10}\text{ClOS}^+$   $[\text{M}+\text{H}]^+$ : 237.0135, found: 237.0138.

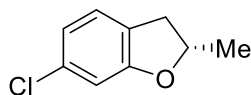

**(S)-6-chloro-2-methyl-2,3-dihydrobenzofuran (4e)**

Colorless oil, 31.4 mg, 93% yield, 34% ee.  $[\alpha]_D^{20} = -12.0$  ( $c = 0.50$ ,  $\text{CHCl}_3$ ). **HPLC:** The ee was determined by chiral HPLC (Chiralpak OD-3, n-hexane/isopropanol 98:2 v/v, flow rate 1.0 mL/min,  $\lambda = 254$  nm, 25 °C). Retention times:  $t_R = 11.892$  min (major),  $t_R = 13.038$  min (minor).  **$^1\text{H NMR}$**  (400 MHz,  $\text{CDCl}_3$ )  $\delta$  (ppm) 6.91 (d,  $J = 7.9$  Hz, 1H), 6.68 (dd,  $J = 7.9, 1.9$  Hz, 1H), 6.63 (d,  $J = 1.8$  Hz, 1H), 4.89-4.77 (m, 1H), 3.14 (dd,  $J = 15.5, 8.8$  Hz, 1H), 2.64 (dd,  $J = 15.9, 8.0$  Hz, 1H), 1.34 (d,  $J = 6.3$  Hz, 3H).  **$^{13}\text{C NMR}$**  (100 MHz,  $\text{CDCl}_3$ )  $\delta$  (ppm) 160.4, 133.1, 125.7, 125.3, 120.1, 110.0, 80.6, 77.3, 77.0, 76.7, 36.5, 21.6. **HRMS** (ESI)  $m/z$ : calcd for  $\text{C}_9\text{H}_{10}\text{ClO}^+$   $[\text{M}+\text{H}]^+$ : 169.0415, found: 169.0418.



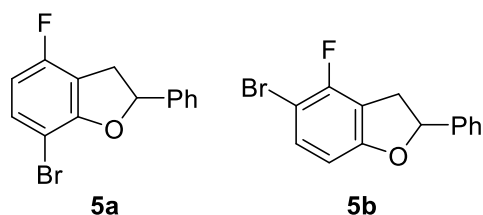

### A mixture of 5a and 5b

Colorless oil, 54.5 mg, 93% yield.  $^1\text{H NMR}$  (400 MHz,  $\text{CDCl}_3$ )  $\delta$  (ppm) 7.42-7.26 (m, 7H, major+minor), 6.56 (d,  $J = 8.5$  Hz, 1H, major+minor), 5.92 (dd,  $J = 9.5, 7.9$  Hz, 0.14H, minor), 5.82 (dd,  $J = 9.4, 8.1$  Hz, 1H, major), 3.78 (ddt,  $J = 16.2, 9.5, 1.0$  Hz, 0.16H, minor), 3.69 (dd,  $J = 16.0, 9.5$  Hz, 1H, major), 3.34 (ddt,  $J = 16.1, 7.9, 1.1$  Hz, 0.15H, minor), 3.25 (dd,  $J = 16.0, 8.0$  Hz, 1H, major).  $^{13}\text{C NMR}$  (100 MHz,  $\text{CDCl}_3$ )  $\delta$  (ppm) 161.1 (d,  $J = 7.1$  Hz, major), 158.2 (d,  $J = 7.7$  Hz, minor), 156.4 (major), 155.8 (minor), 154.0 (major), 153.4 (minor), 140.7 (major), 140.0 (minor), 134.7 (minor), 132.7 (major), 128.8 (minor), 128.8 (major), 128.6 (minor), 128.4 (major), 125.6 (major+minor), 115.3 (d,  $J = 23.2$  Hz, minor), 114.6 (d,  $J = 22.6$  Hz, major), 106.6 (d,  $J = 2.6$  Hz, major+minor), 100.0 (d,  $J = 21.3$  Hz, minor), 99.1 (d,  $J = 21.4$  Hz, major), 85.9 (minor), 85.5 (major), 77.3, 77.0, 76.7, 36.4 (d,  $J = 2.1$  Hz, minor), 35.4 (d,  $J = 1.9$  Hz, major).  $^{19}\text{F NMR}$  (376 MHz,  $\text{CDCl}_3$ )  $\delta$  (ppm) -110.13 (major), -111.56 (minor). **HRMS** (ESI)  $m/z$ : calcd for  $\text{C}_{14}\text{H}_{11}\text{BrFO}^+$   $[\text{M}+\text{H}]^+$ : 292.9972, found: 292.9968.

#### 4. General Procedure of Transformation

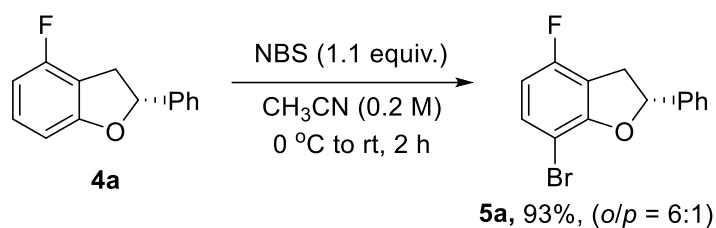

To a 15 ml round flask was added racemic **4a** (42.8mg, 0.2 mmol) in 2 mL CH<sub>3</sub>CN, the flask was then cooled to 0 °C in a ice bath. Then, *N*-bromosuccinimide (39.1 mg, 0.22 mmol) was added into the system, warmed to room temperature. The solution was stirred at rt for 2 h. Then, the solvent was removed under reduced pressure. The crude product was purified by flash chromatography on silica gel (silica: 200–300 mesh, eluent: petroleum ether : EtOAc = 50:1-20: 1 v/v) to afford the corresponding product **5a** as a colorless oil with 93% yield.

## 5. NMR Spectroscopic Data

### <sup>1</sup>H NMR of 1a (400 MHz, Chloroform-*d*)

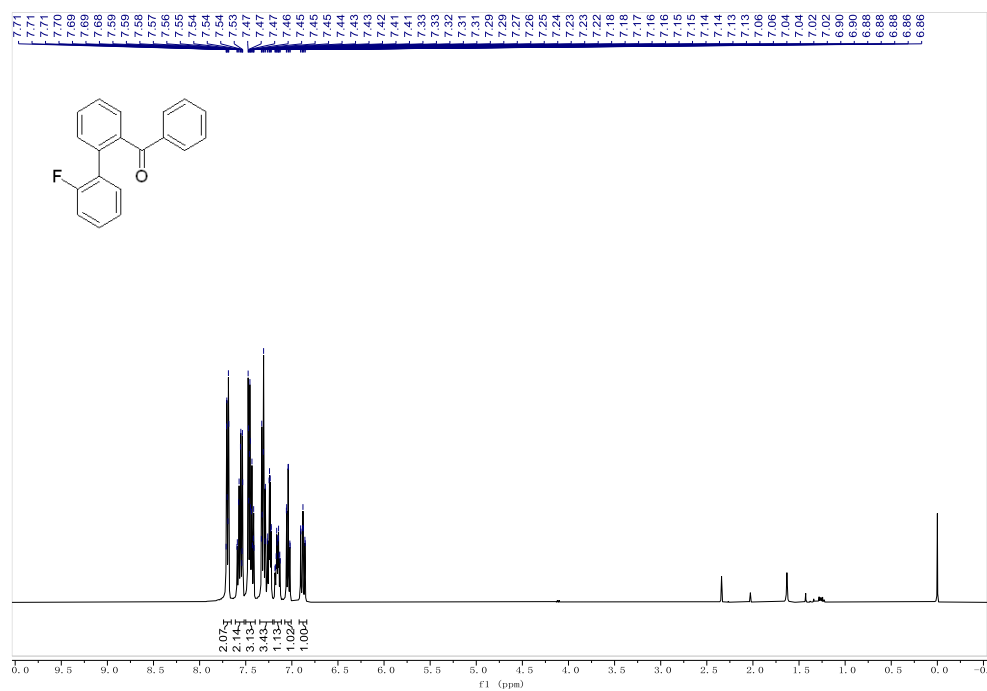

### <sup>13</sup>C NMR of 1a (101 MHz, Chloroform-*d*)

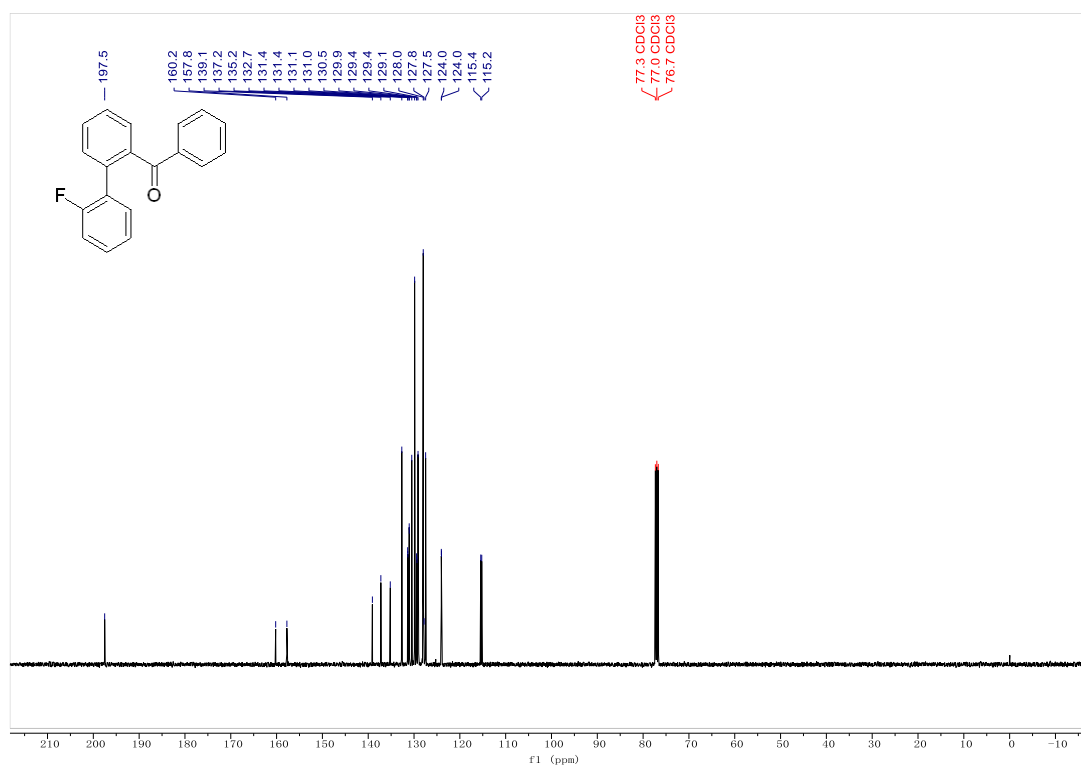

**<sup>19</sup>F NMR of 1a (400 MHz, Chloroform-*d*)**

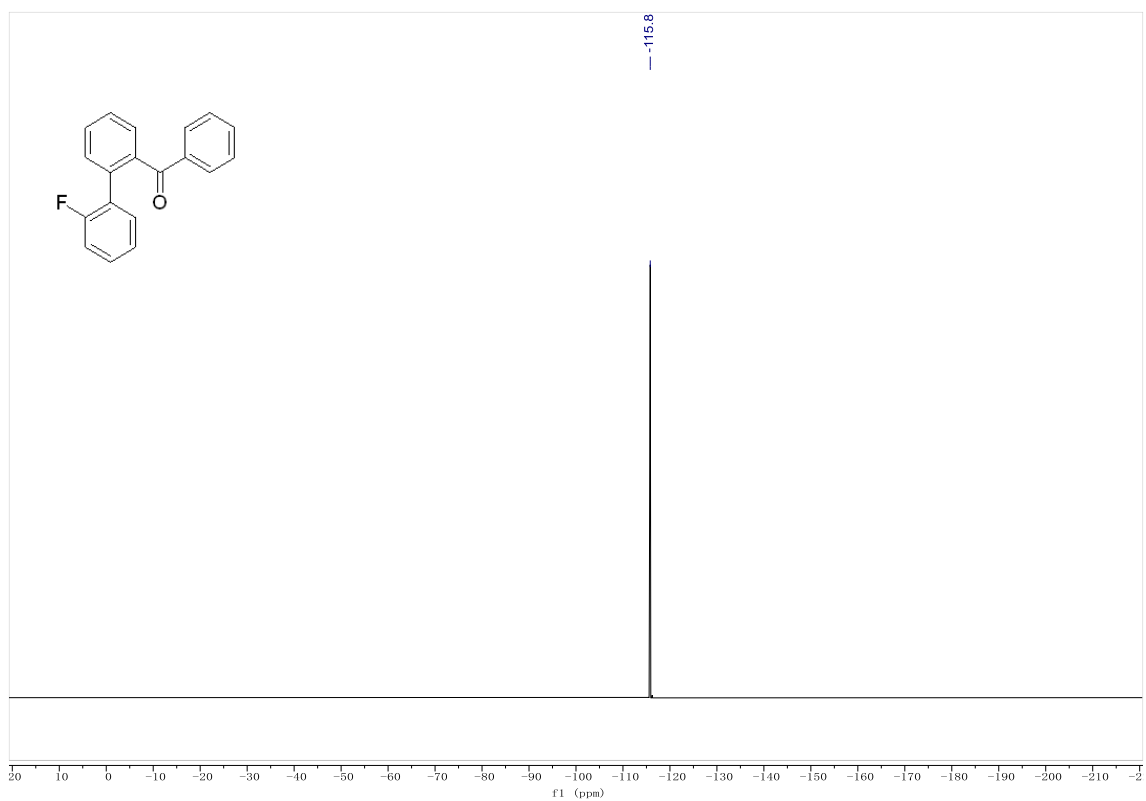

**<sup>1</sup>H NMR of 1b (400 MHz, Chloroform-*d*)**

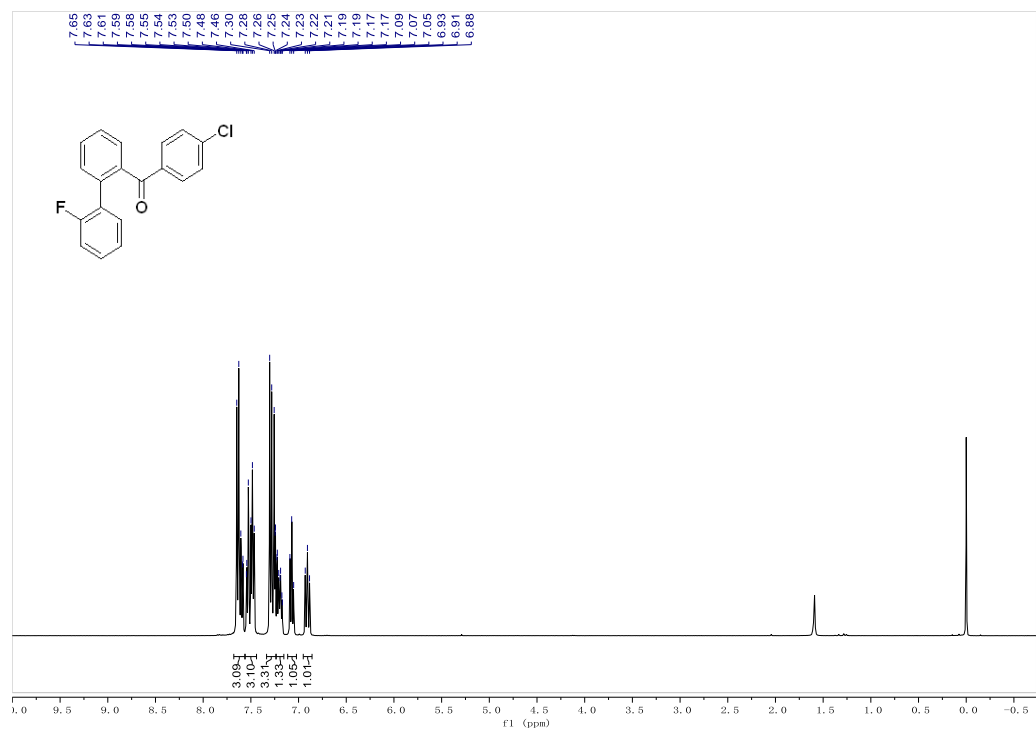

**<sup>13</sup>C NMR of 1b (101 MHz, Chloroform-*d*)**

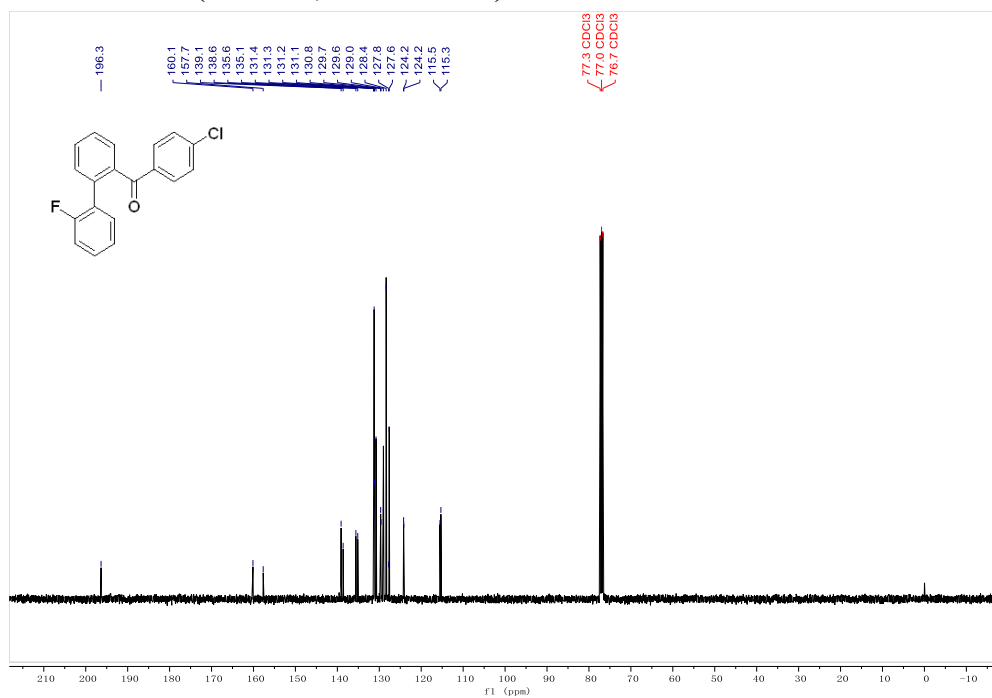

**<sup>19</sup>F NMR of 1b (400 MHz, Chloroform-*d*)**

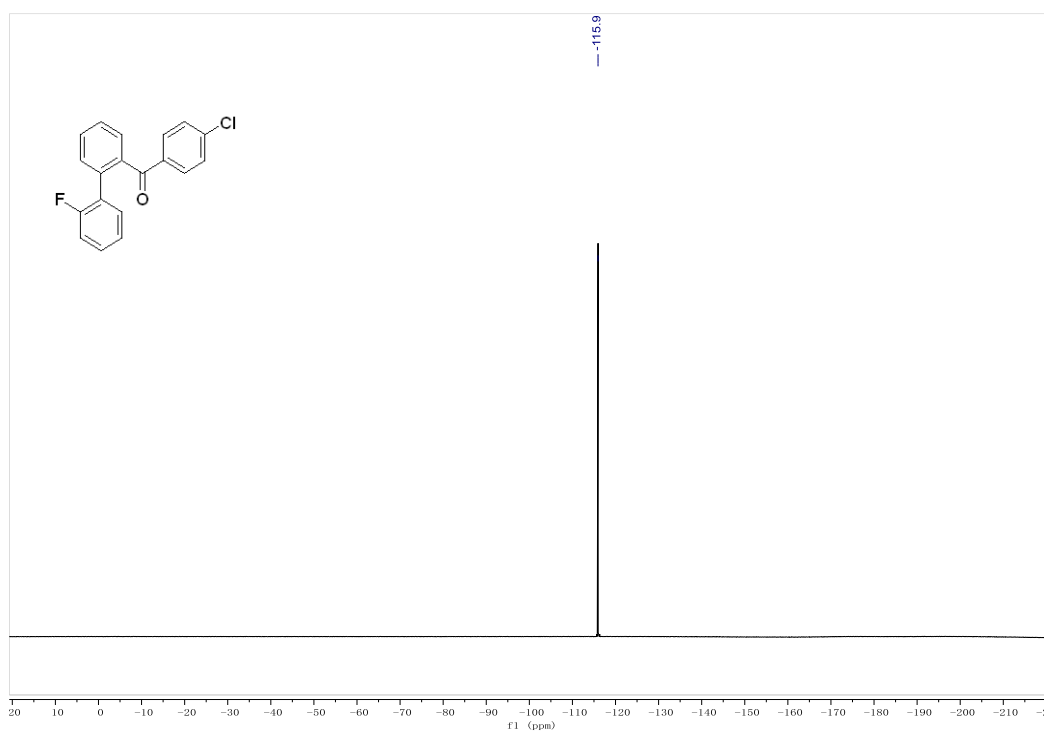

**<sup>1</sup>H NMR of 1c (400 MHz, Chloroform-*d*)**

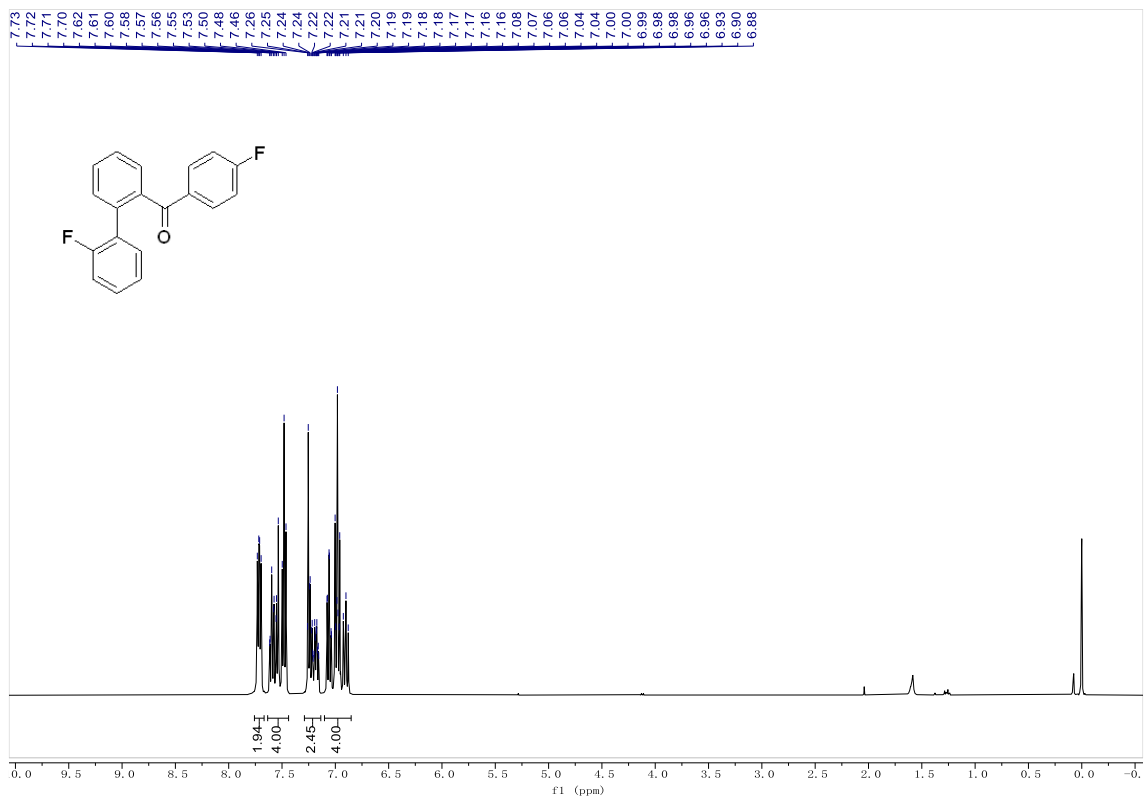

**<sup>13</sup>C NMR of 1c (101 MHz, Chloroform-*d*)**

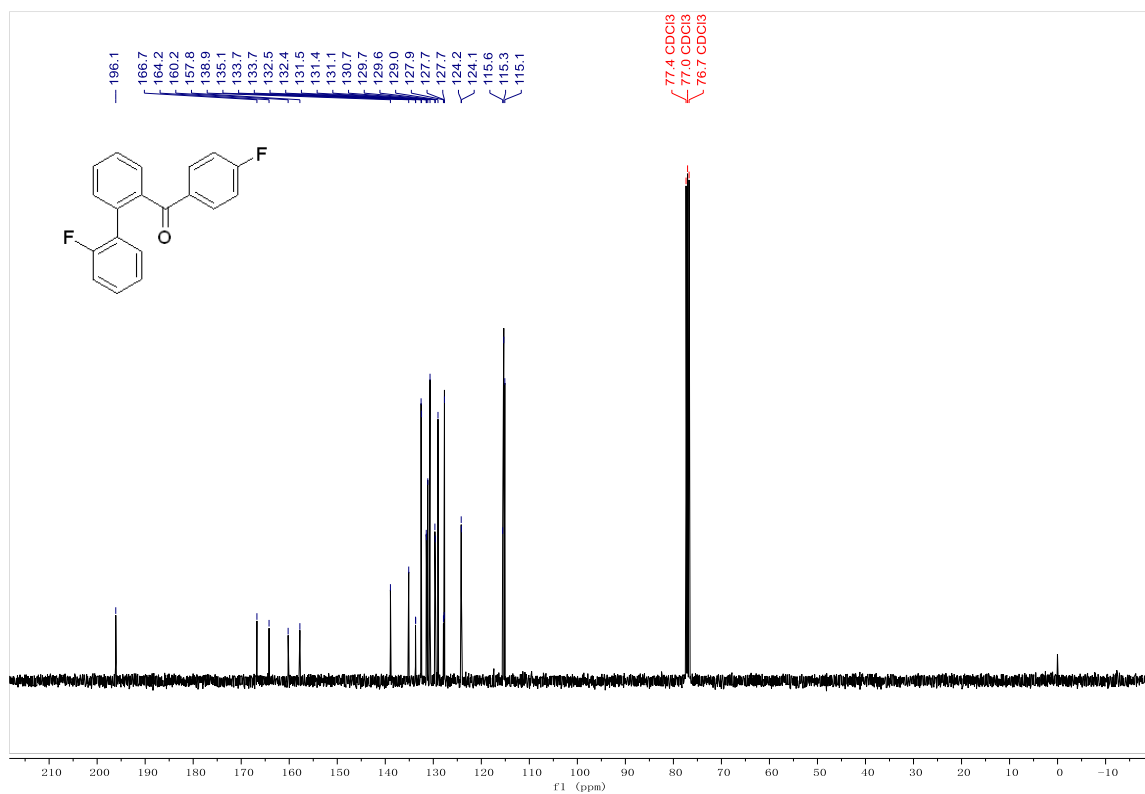

**<sup>19</sup>F NMR of 1c (400 MHz, Chloroform-*d*)**

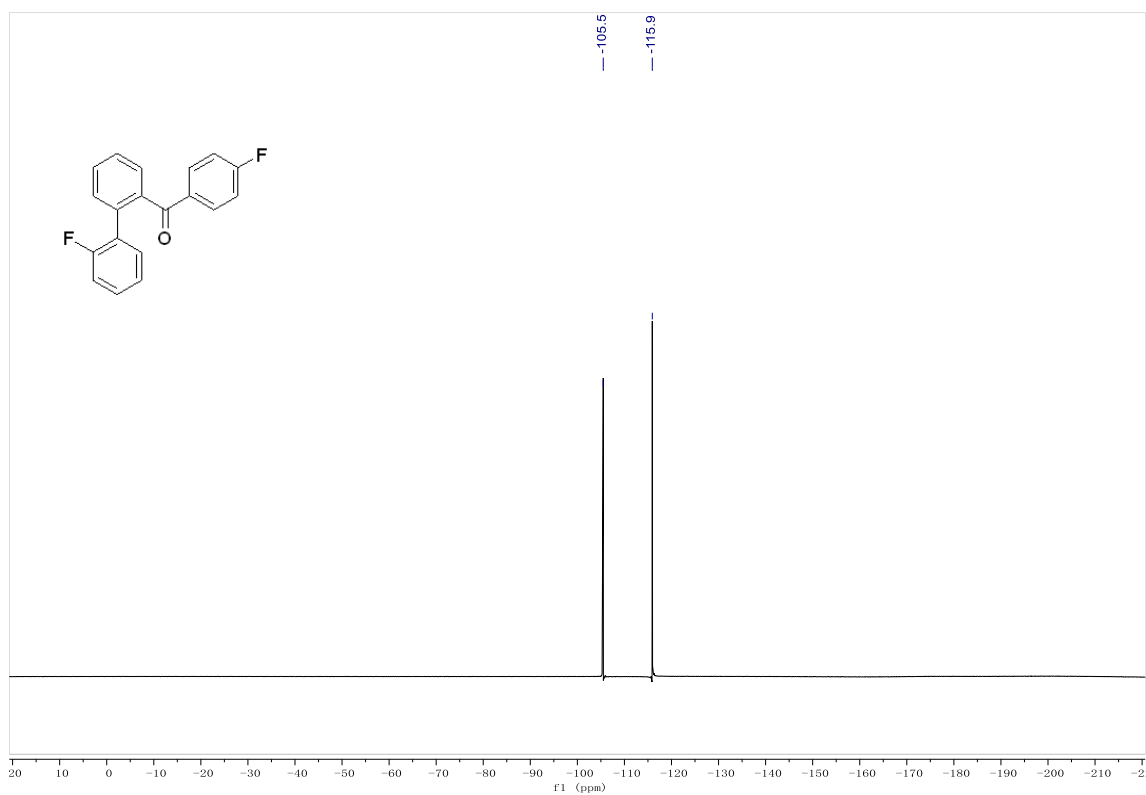

**<sup>1</sup>H NMR of 1d (400 MHz, Chloroform-*d*)**

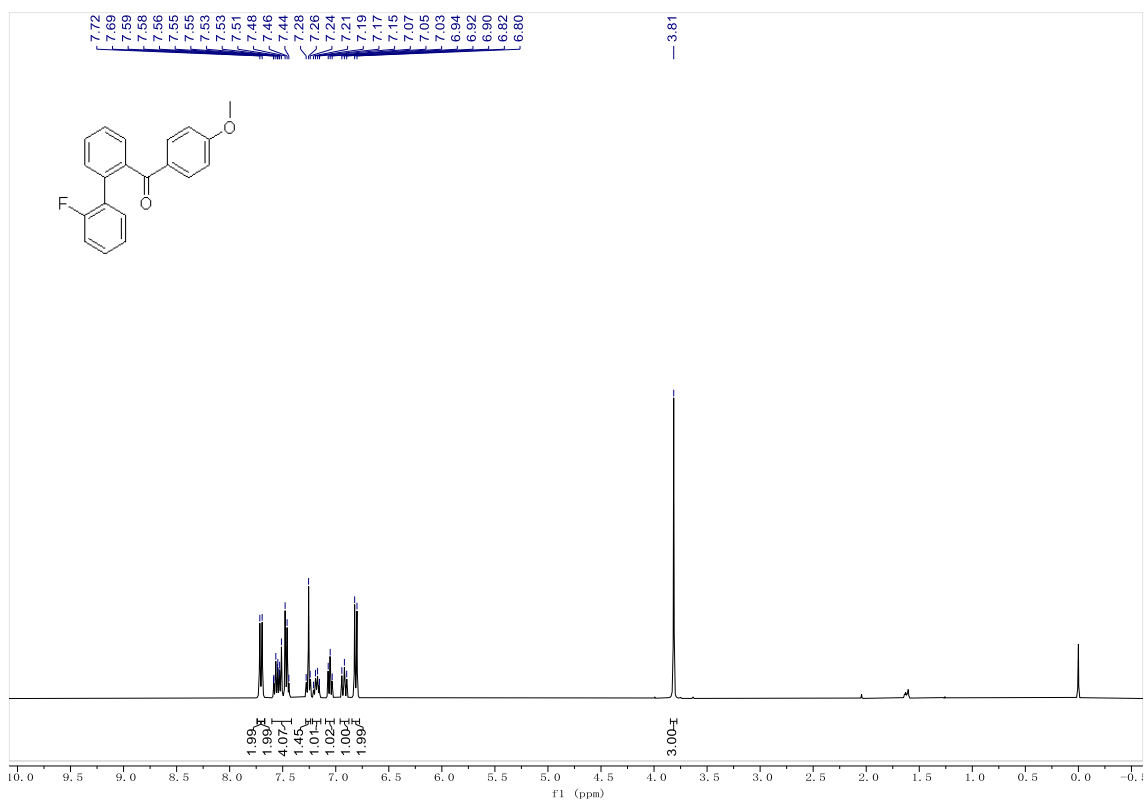

**<sup>13</sup>C NMR of 1d (101 MHz, Chloroform-*d*)**

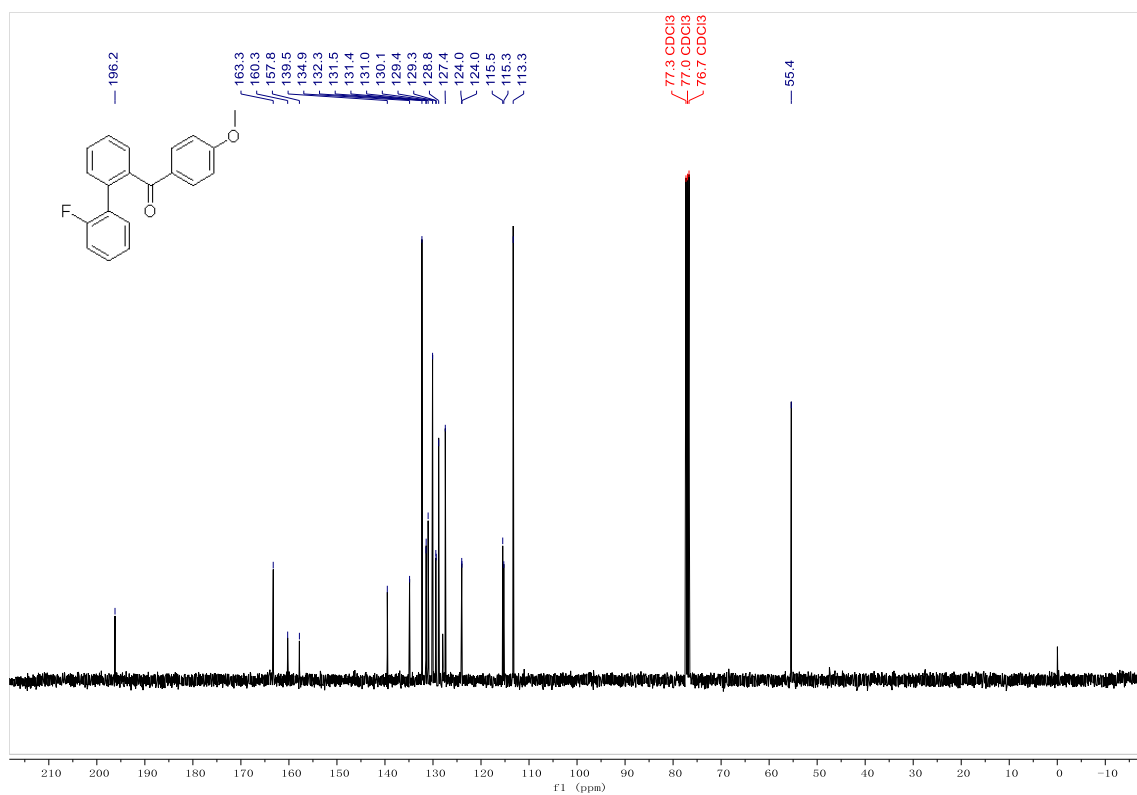

**<sup>19</sup>F NMR of 1d (400 MHz, Chloroform-*d*)**

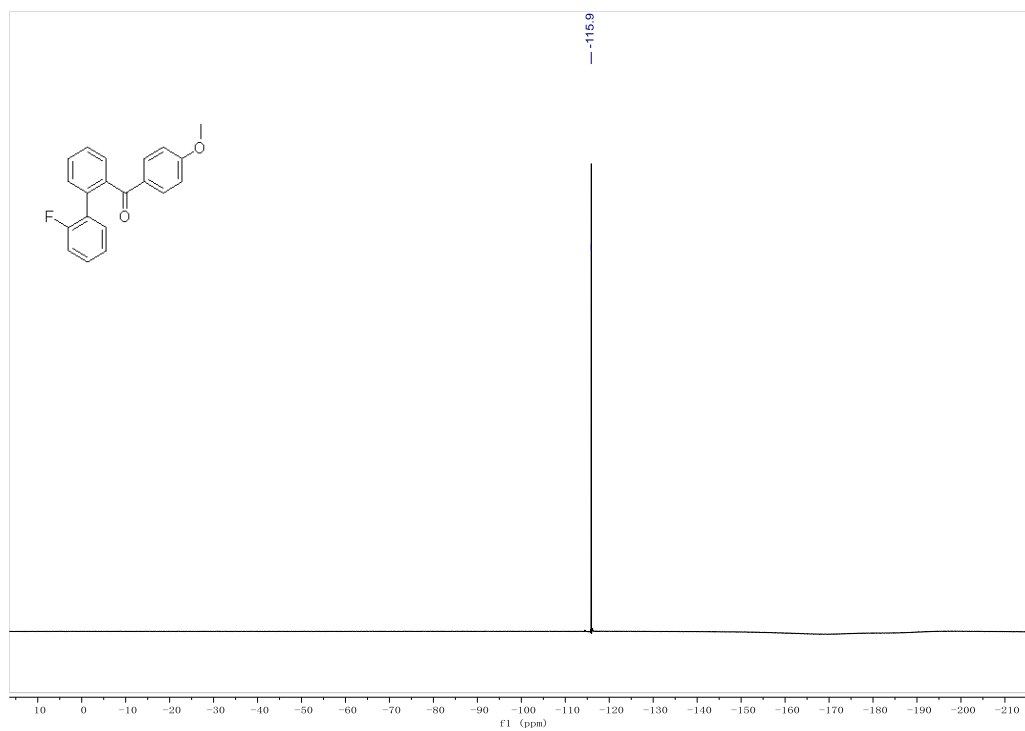



**<sup>1</sup>H NMR of 1e (400 MHz, Chloroform-*d*)**

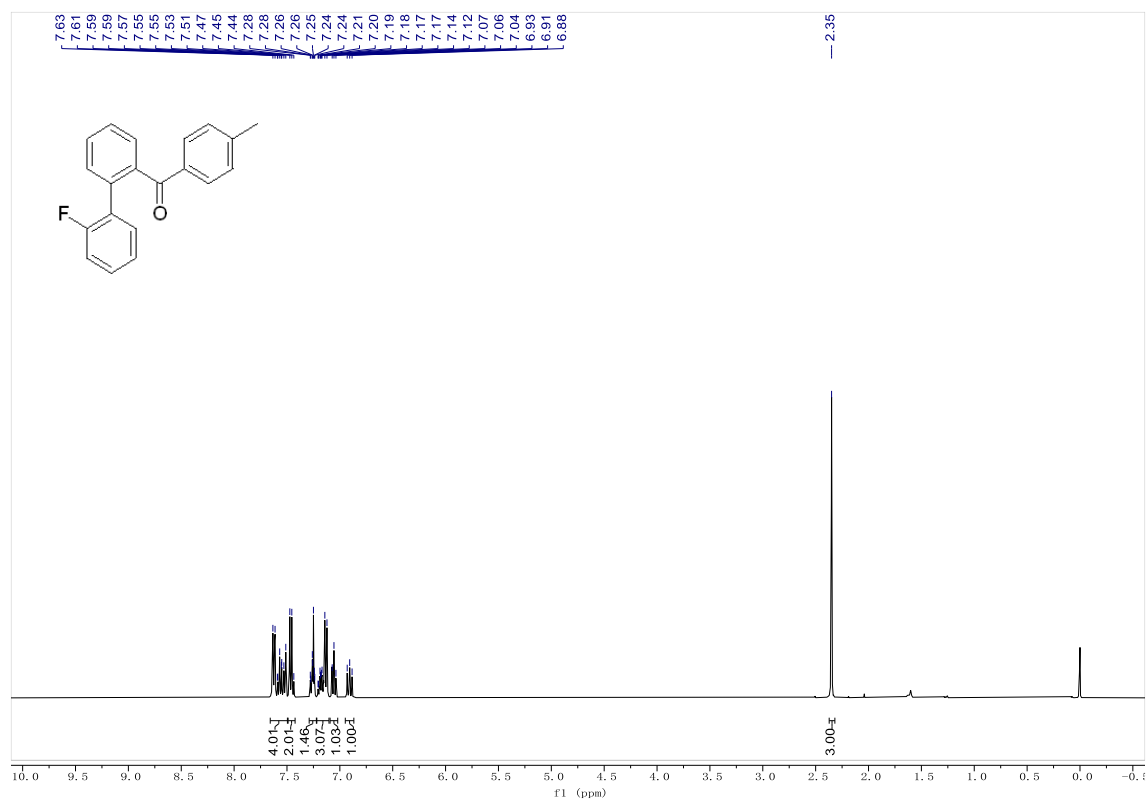

**<sup>13</sup>C NMR of 1e (101 MHz, Chloroform-*d*)**

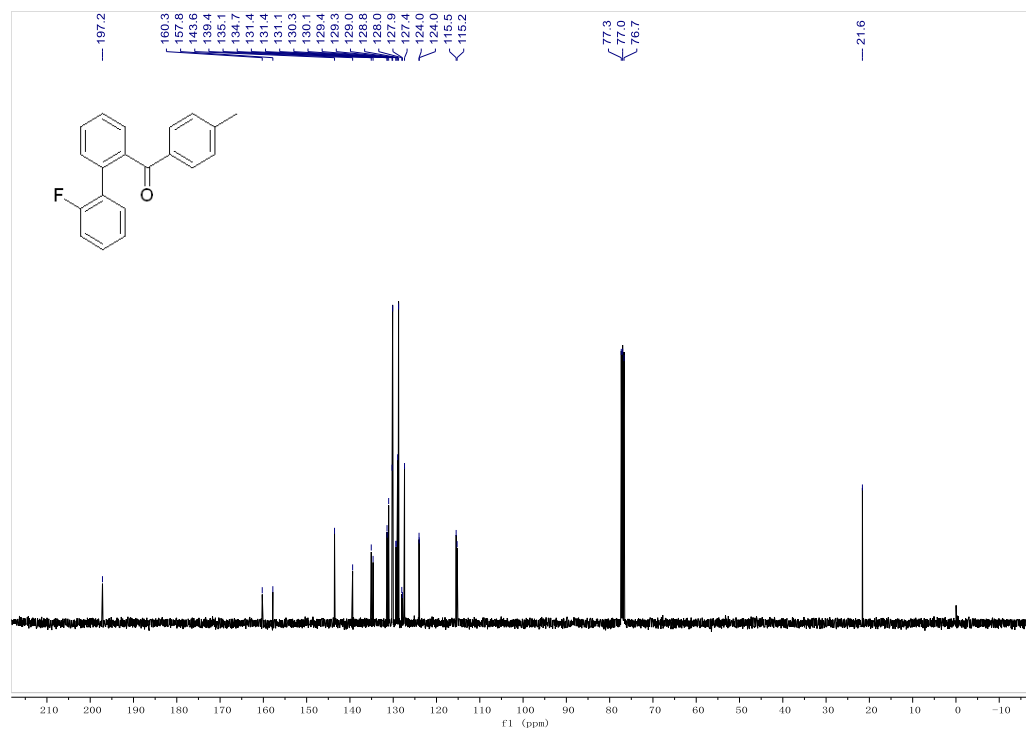

**<sup>19</sup>F NMR of 1e (400 MHz, Chloroform-*d*)**

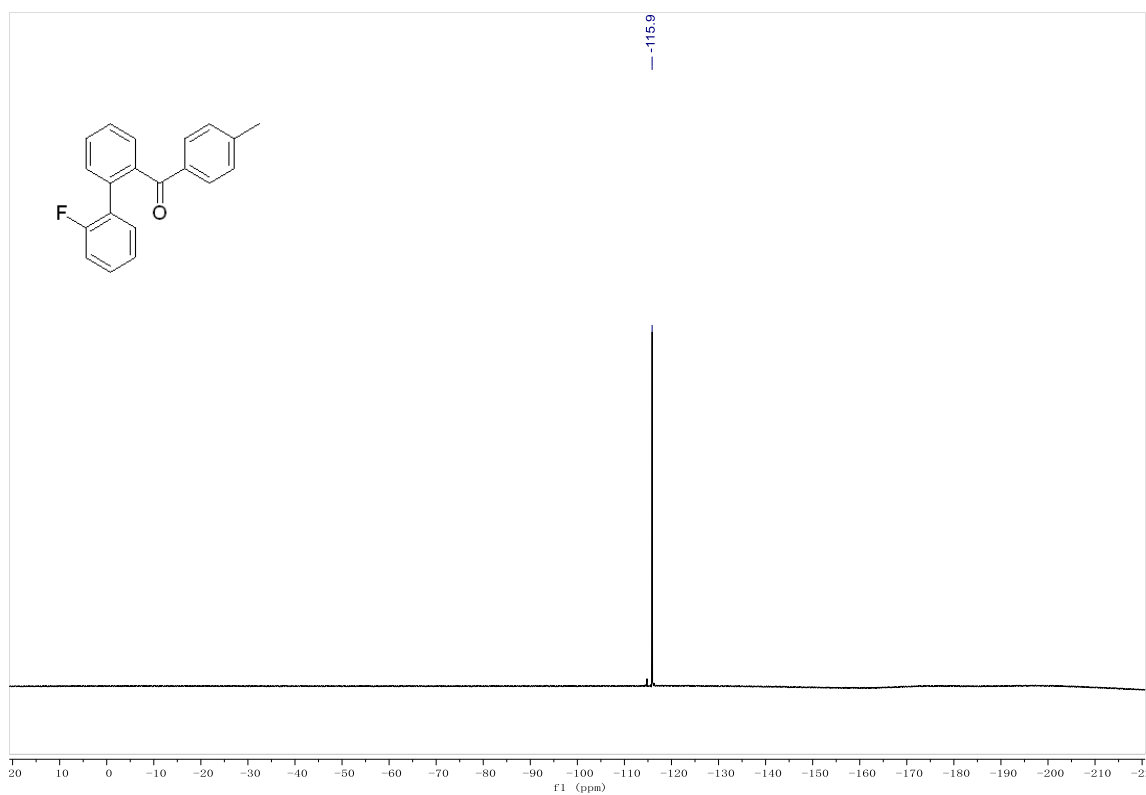

**<sup>1</sup>H NMR of 1f (400 MHz, Chloroform-*d*)**

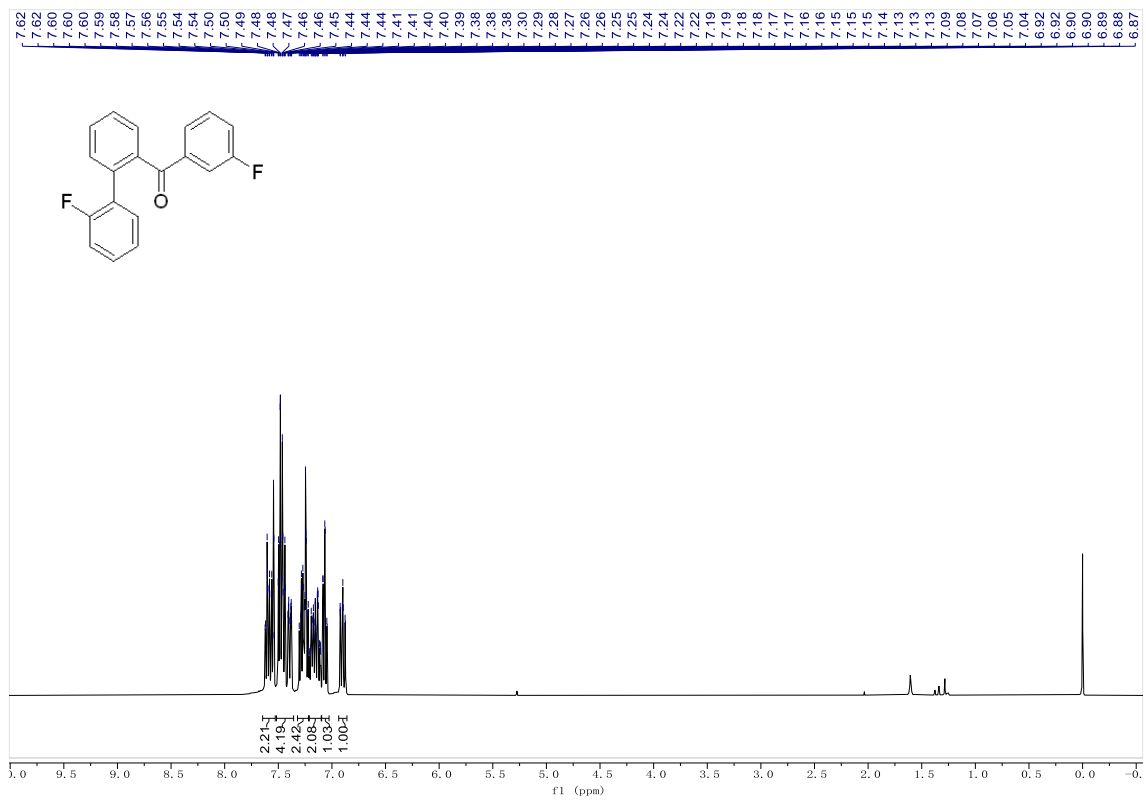

**<sup>13</sup>C NMR of 1f (101 MHz, Chloroform-*d*)**

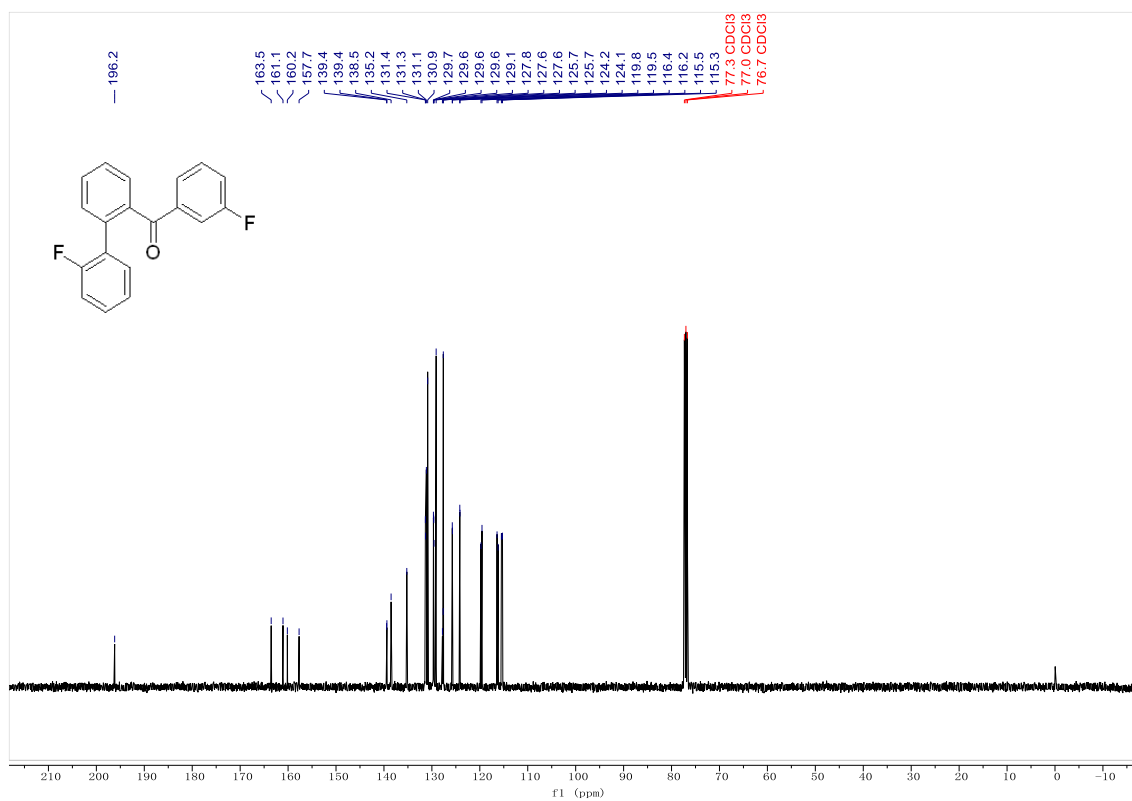

**<sup>19</sup>F NMR of 1f (400 MHz, Chloroform-*d*)**

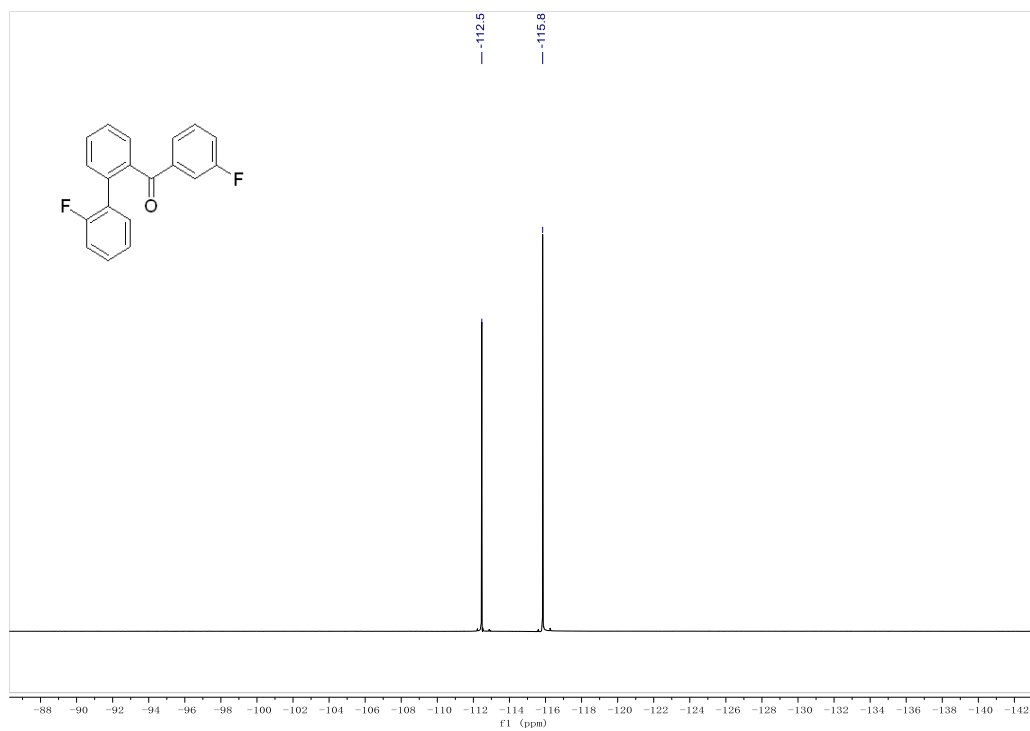

**<sup>1</sup>H NMR of 1g (400 MHz, Chloroform-*d*)**

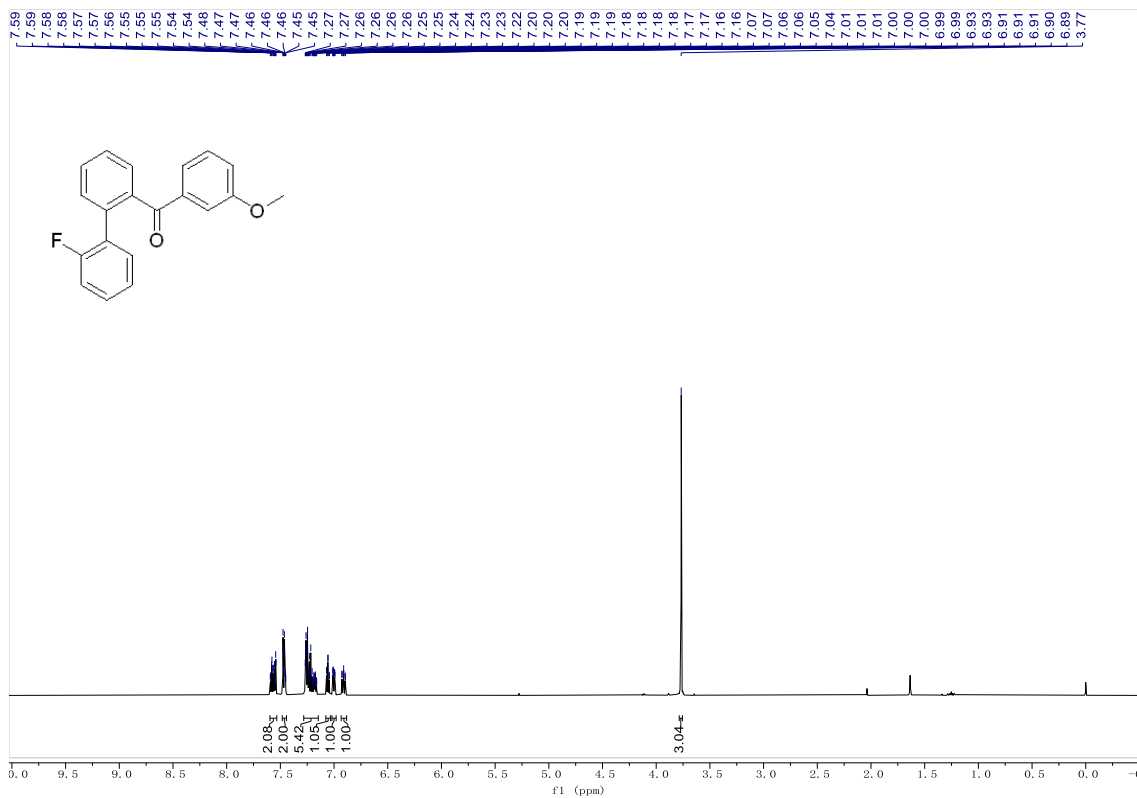

**<sup>13</sup>C NMR of 1g (151 MHz, Chloroform-d)**

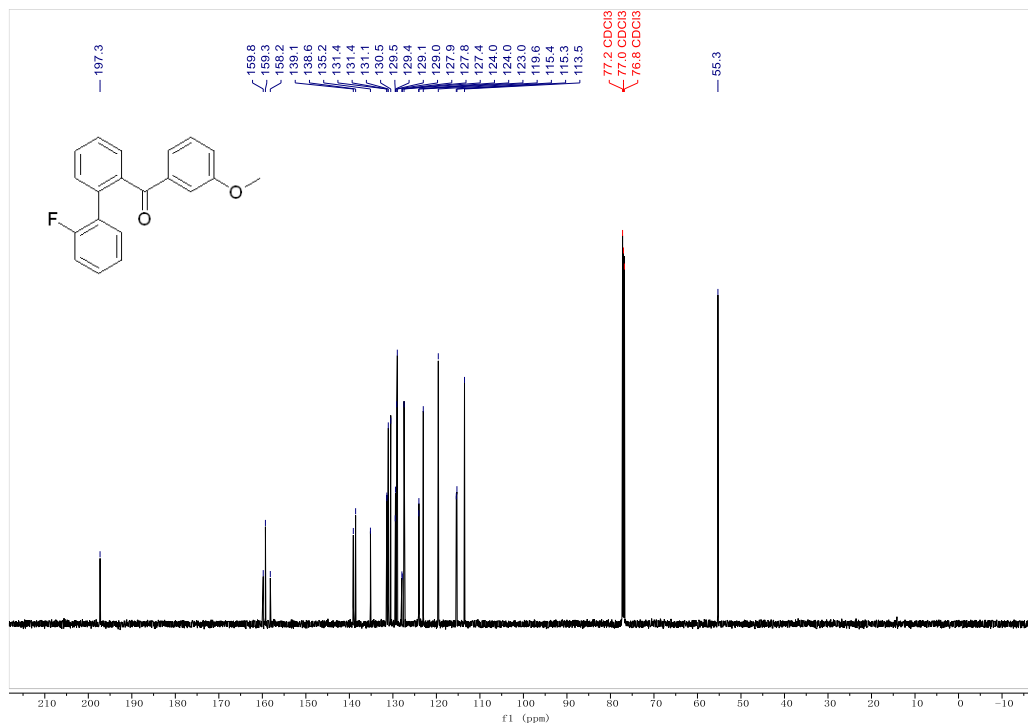

**<sup>19</sup>F NMR of 1g (400 MHz, Chloroform-*d*)**

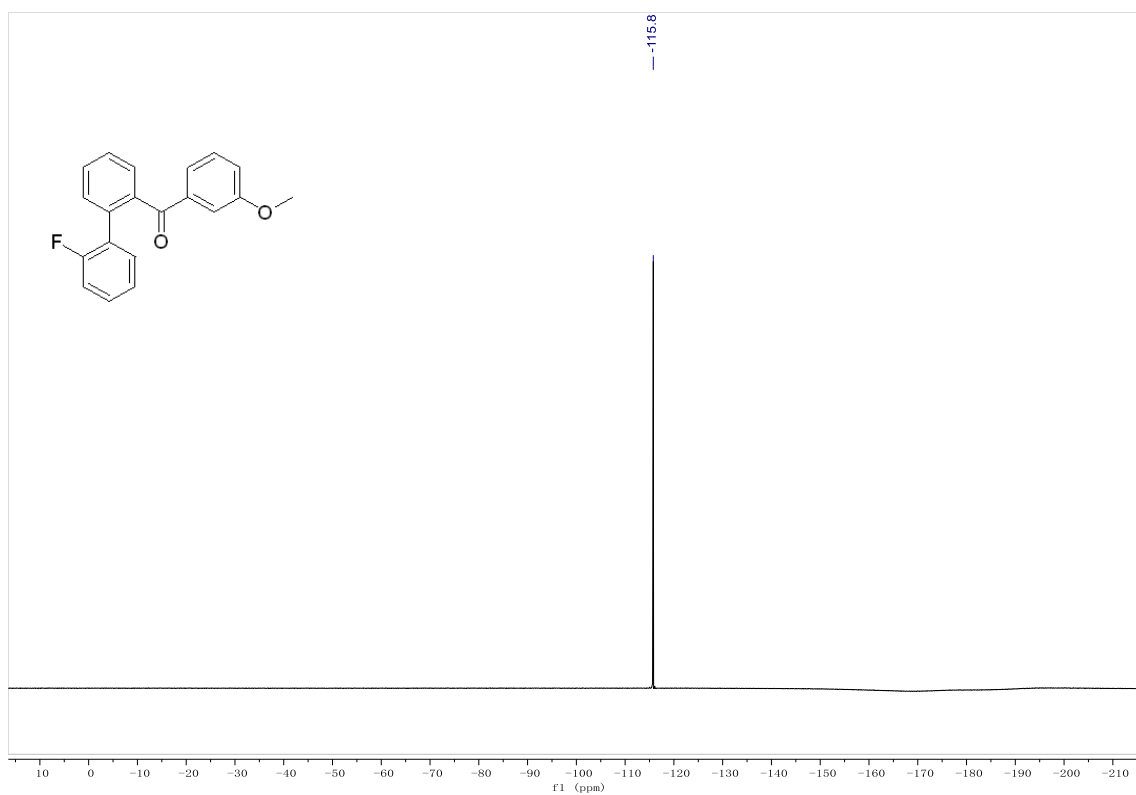

**<sup>1</sup>H NMR of 1h (400 MHz, Chloroform-*d*)**

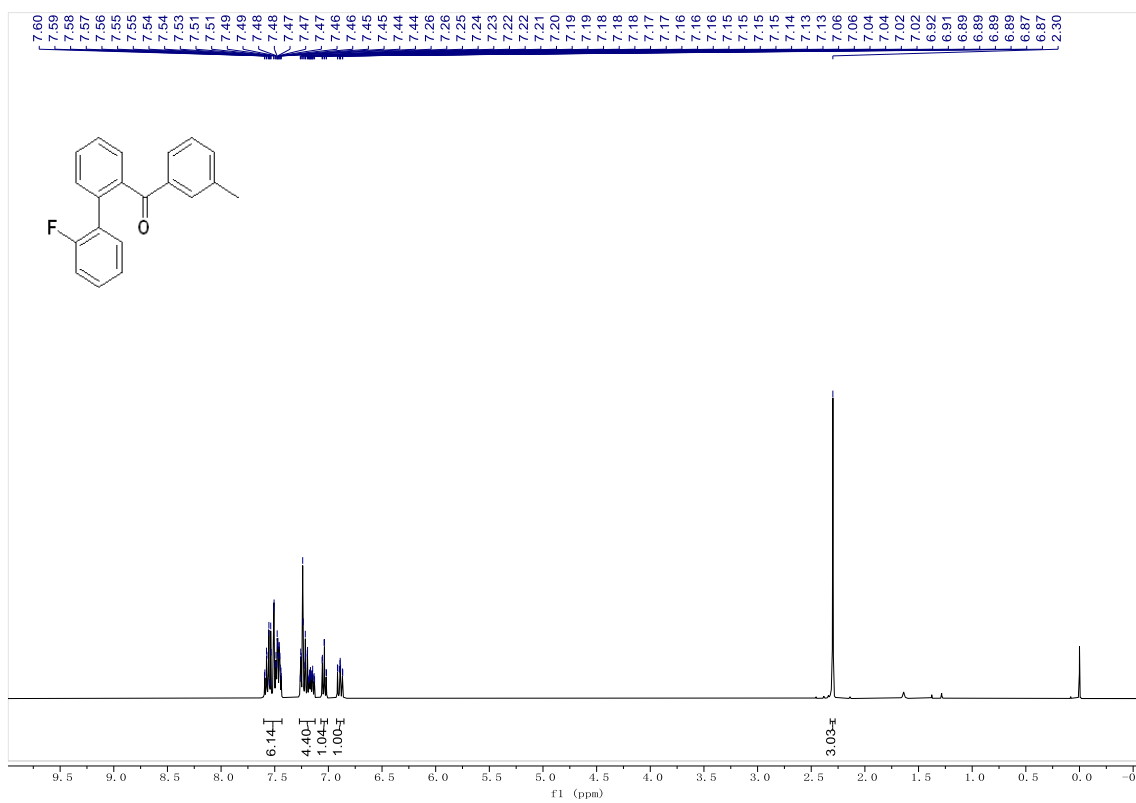

**<sup>13</sup>C NMR of 1h (101 MHz, Chloroform-d)**

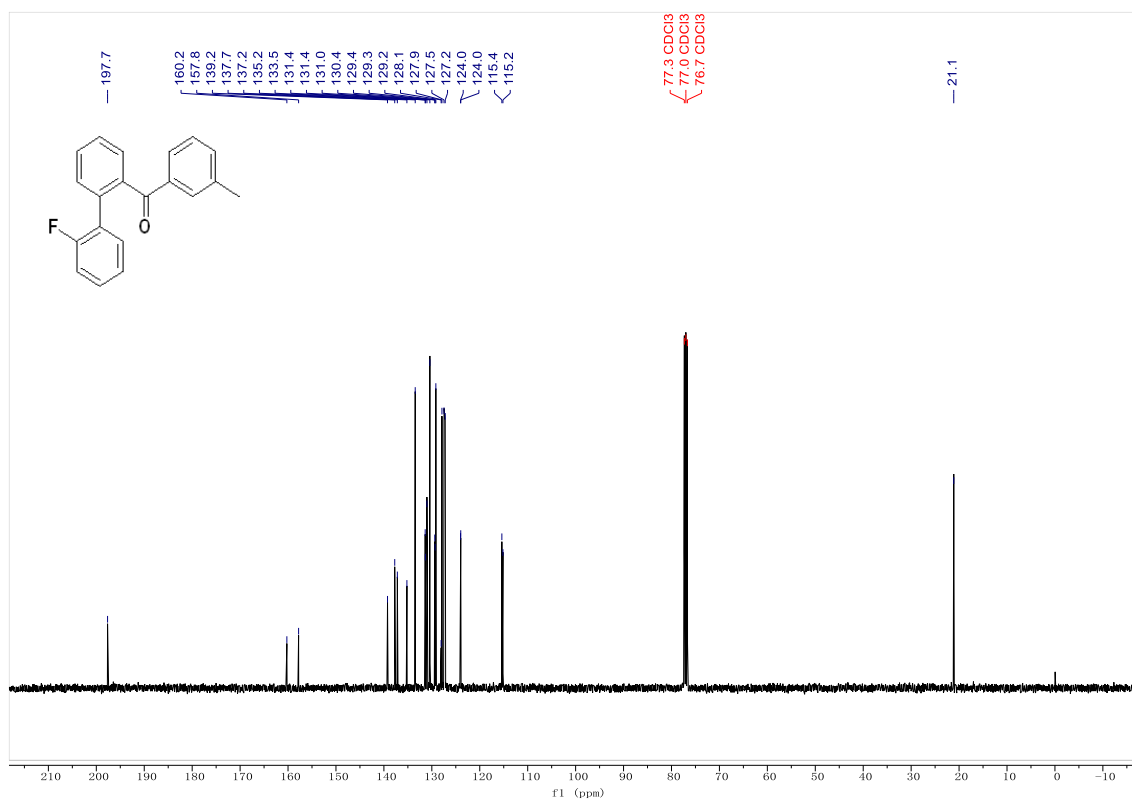

**<sup>19</sup>F NMR of 1h (400 MHz, Chloroform-d)**

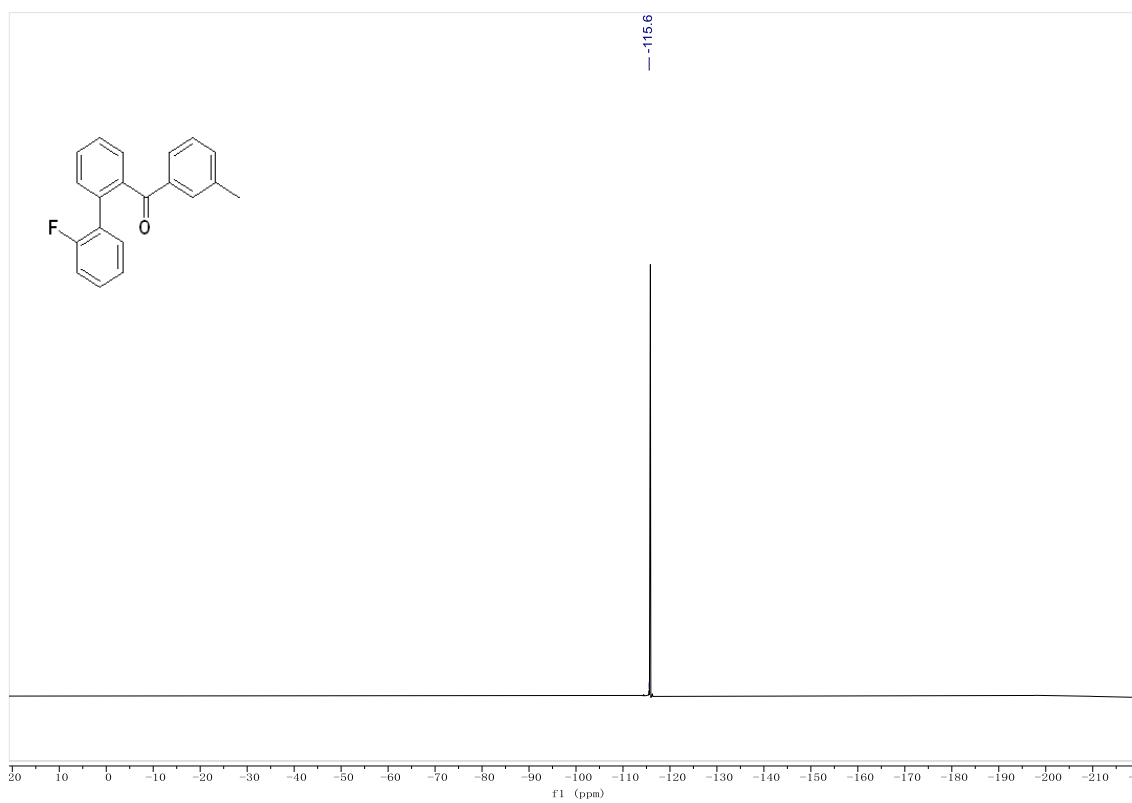

### <sup>1</sup>H NMR of 1i (400 MHz, Chloroform-d)

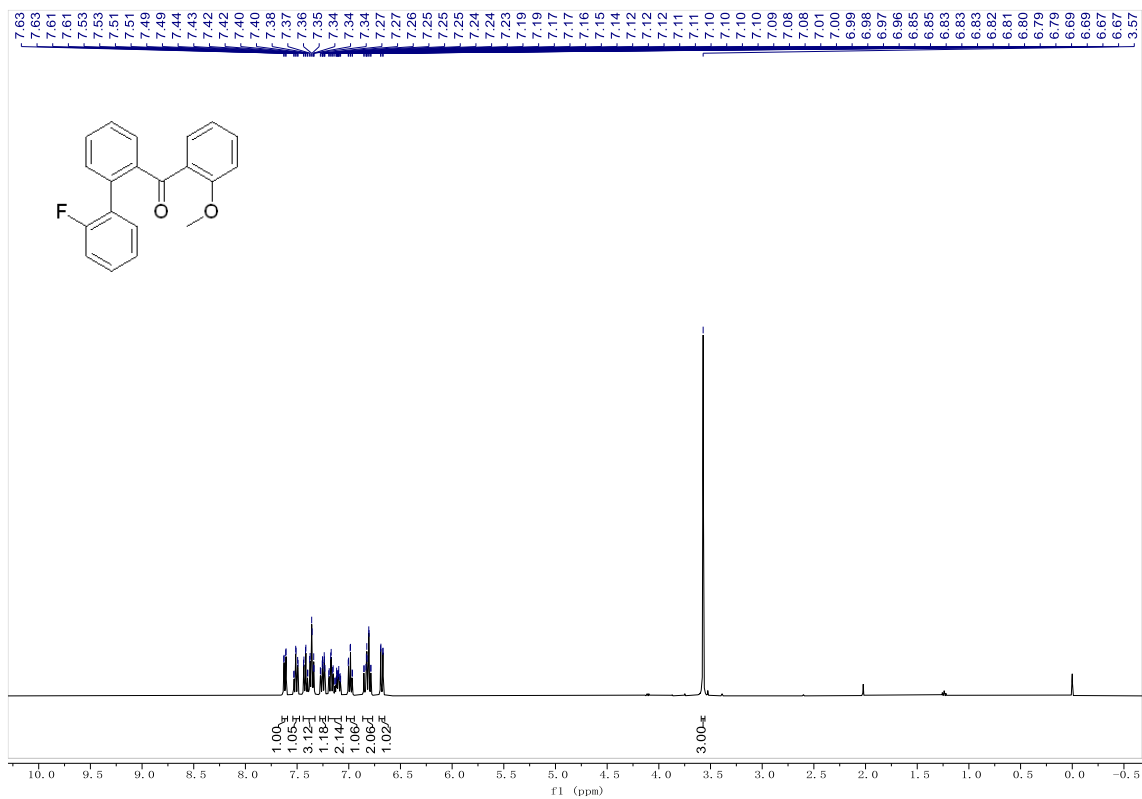

### <sup>13</sup>C NMR of 1i (101 MHz, Chloroform-d)

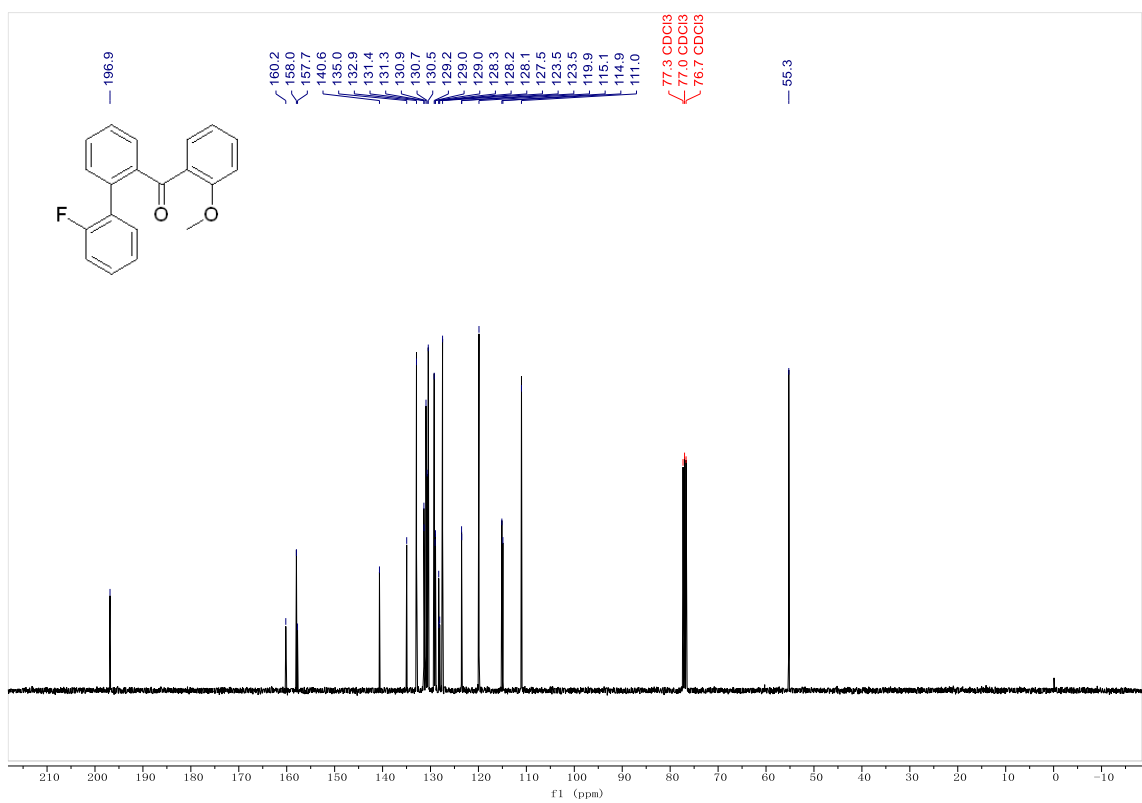

**<sup>19</sup>F NMR of 1i (400 MHz, Chloroform-*d*)**

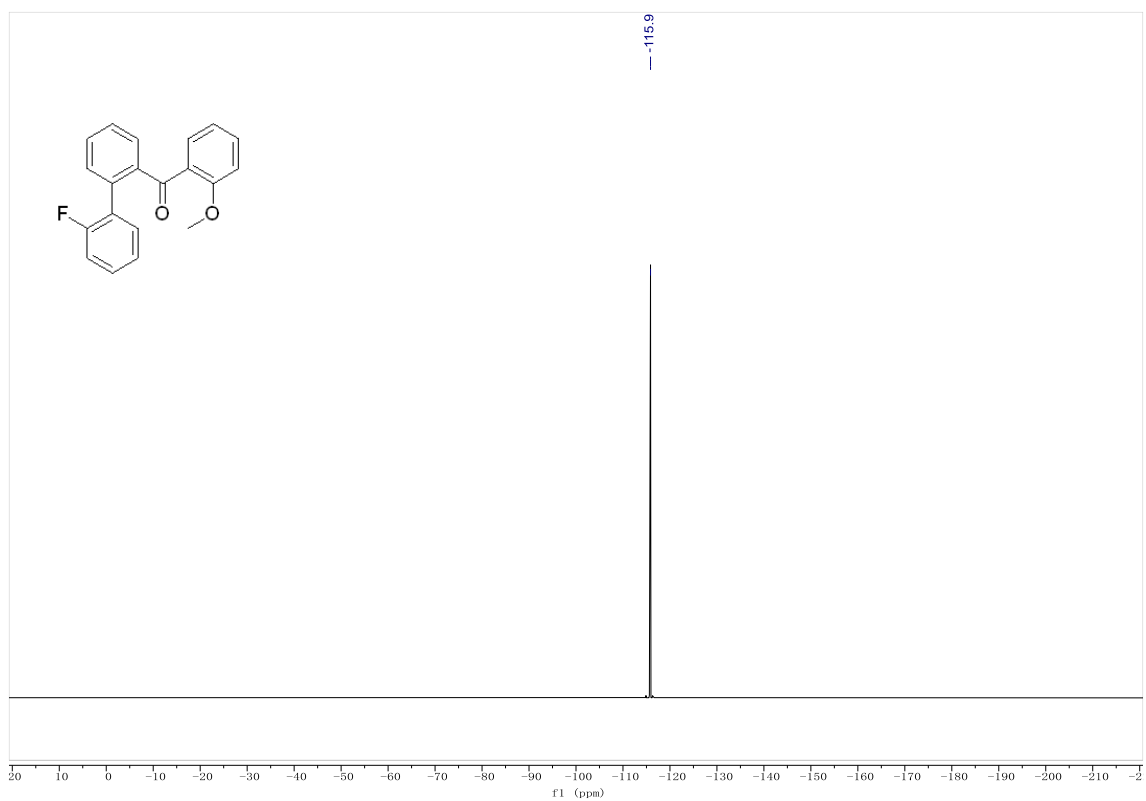

**<sup>1</sup>H NMR of 1j (400 MHz, Chloroform-*d*)**

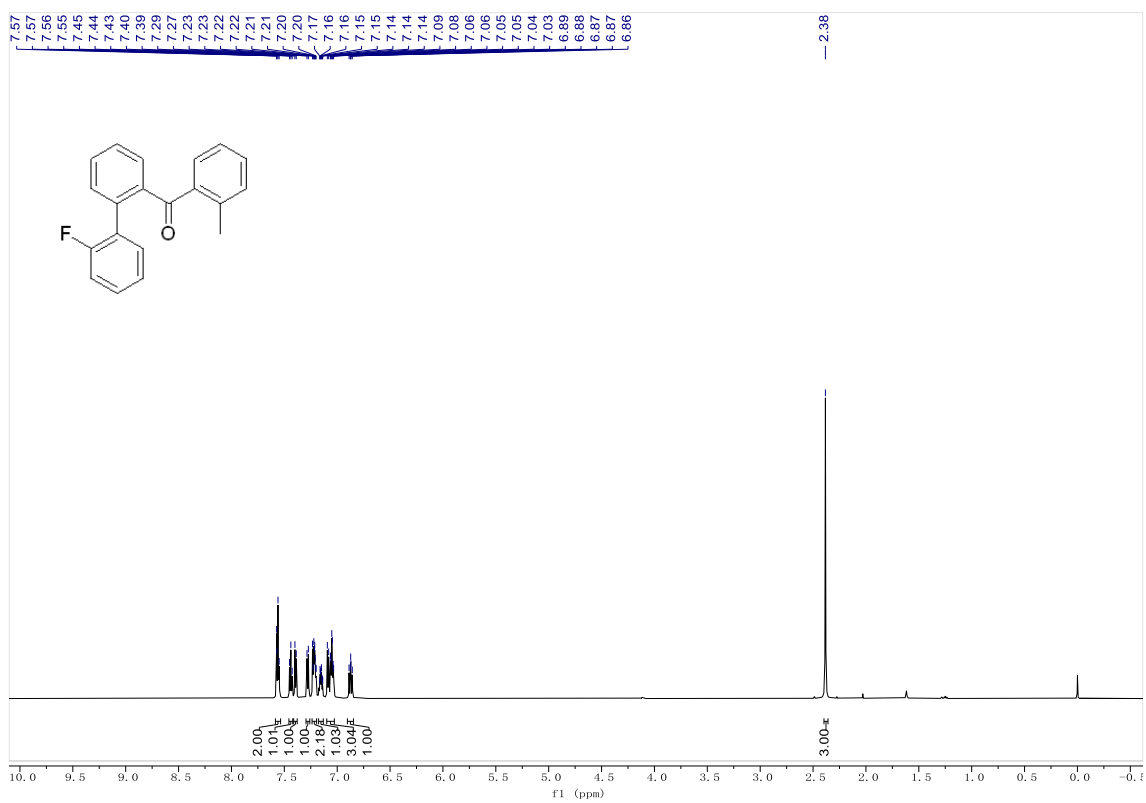



**<sup>13</sup>C NMR of 1j (101 MHz, Chloroform-*d*)**

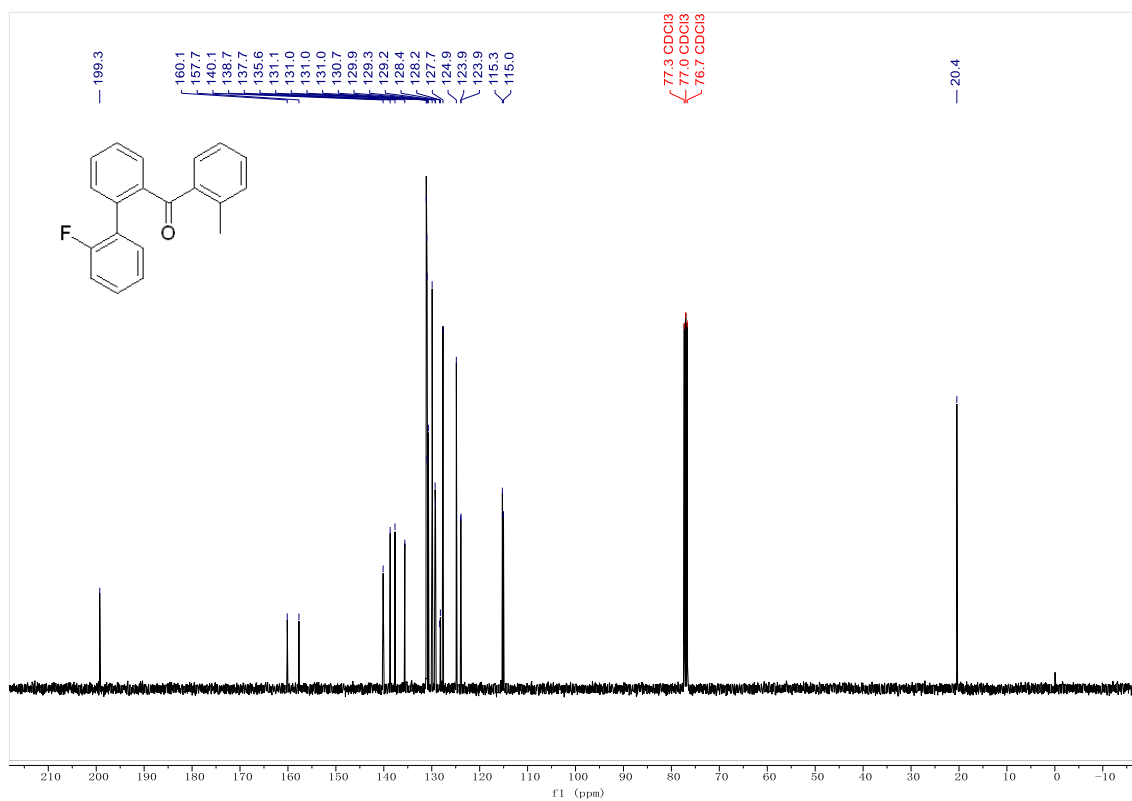

**<sup>19</sup>F NMR of 1j (400 MHz, Chloroform-*d*)**

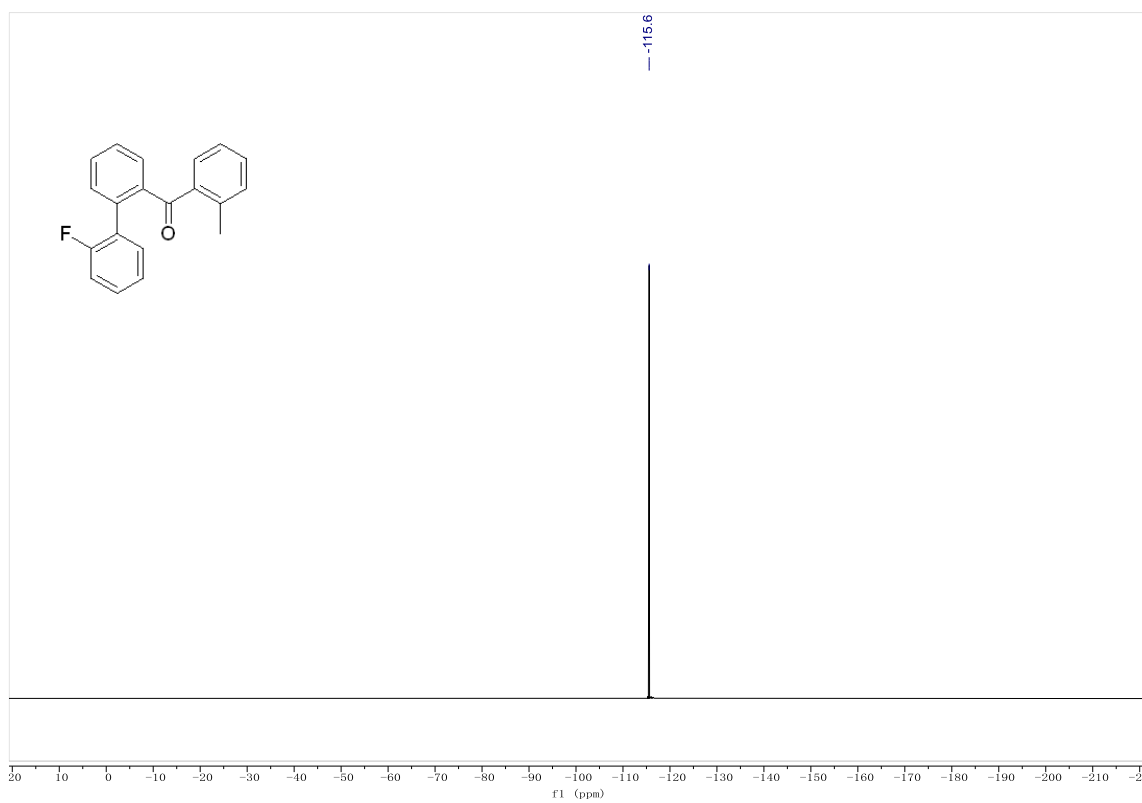

### <sup>1</sup>H NMR of 1k (400 MHz, Chloroform-*d*)

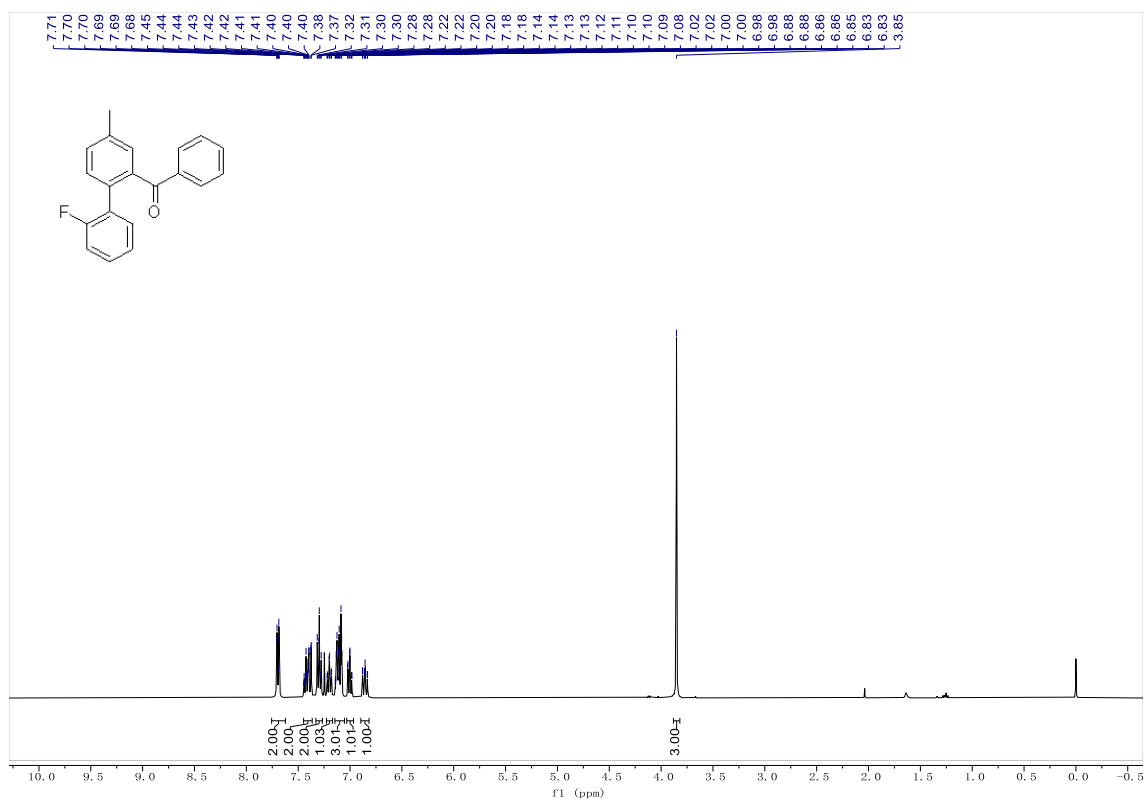

### <sup>13</sup>C NMR of 1k (101 MHz, Chloroform-*d*)

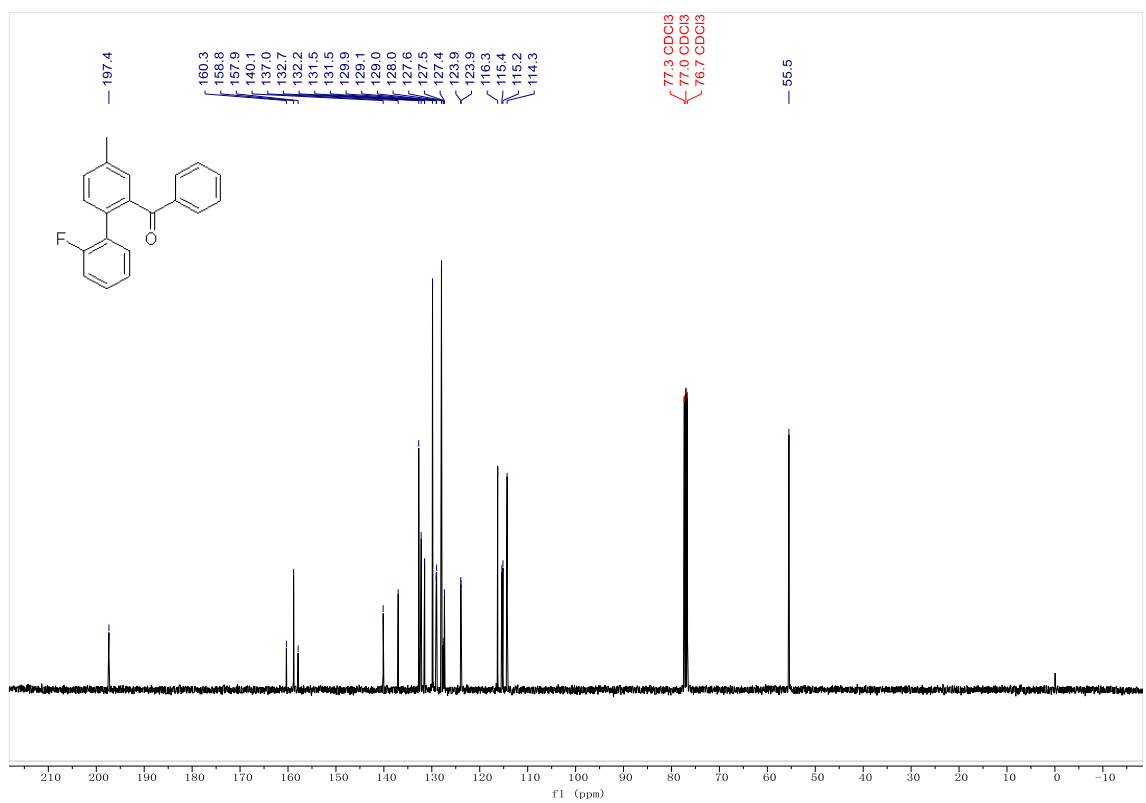

**<sup>19</sup>F NMR of 1k (400 MHz, Chloroform-*d*)**

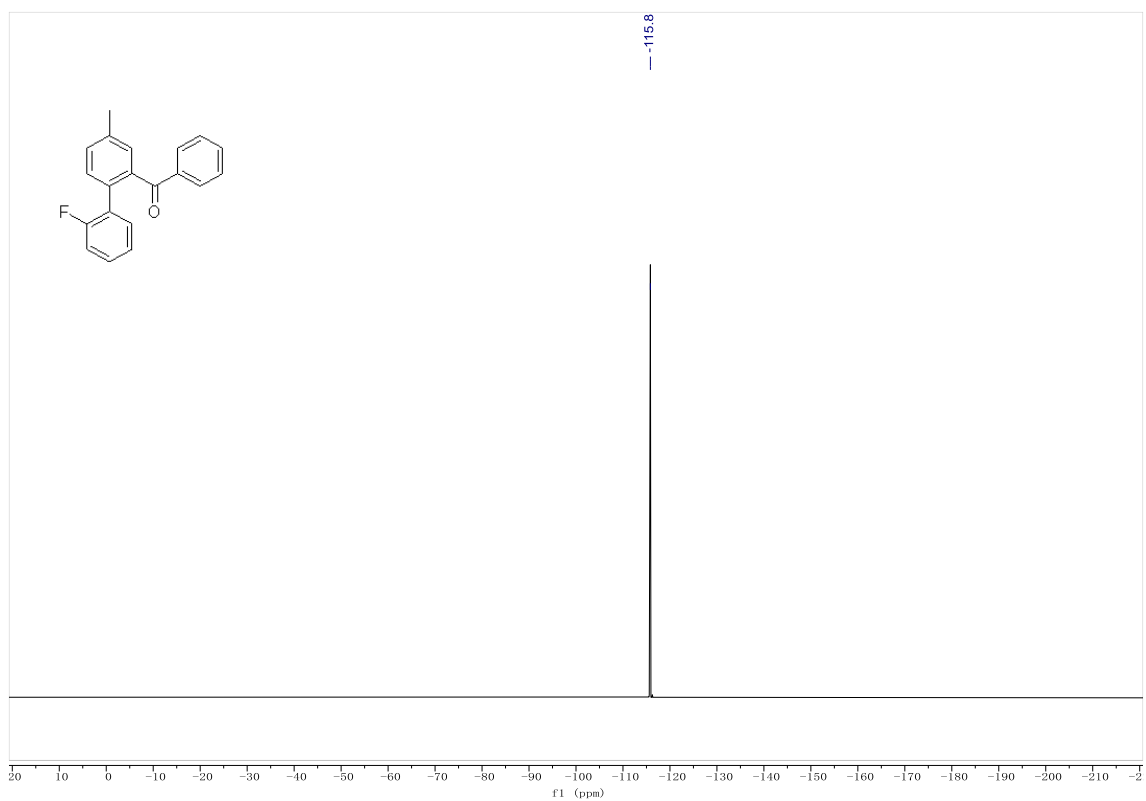

**<sup>1</sup>H NMR of 1l (400 MHz, Chloroform-*d*)**

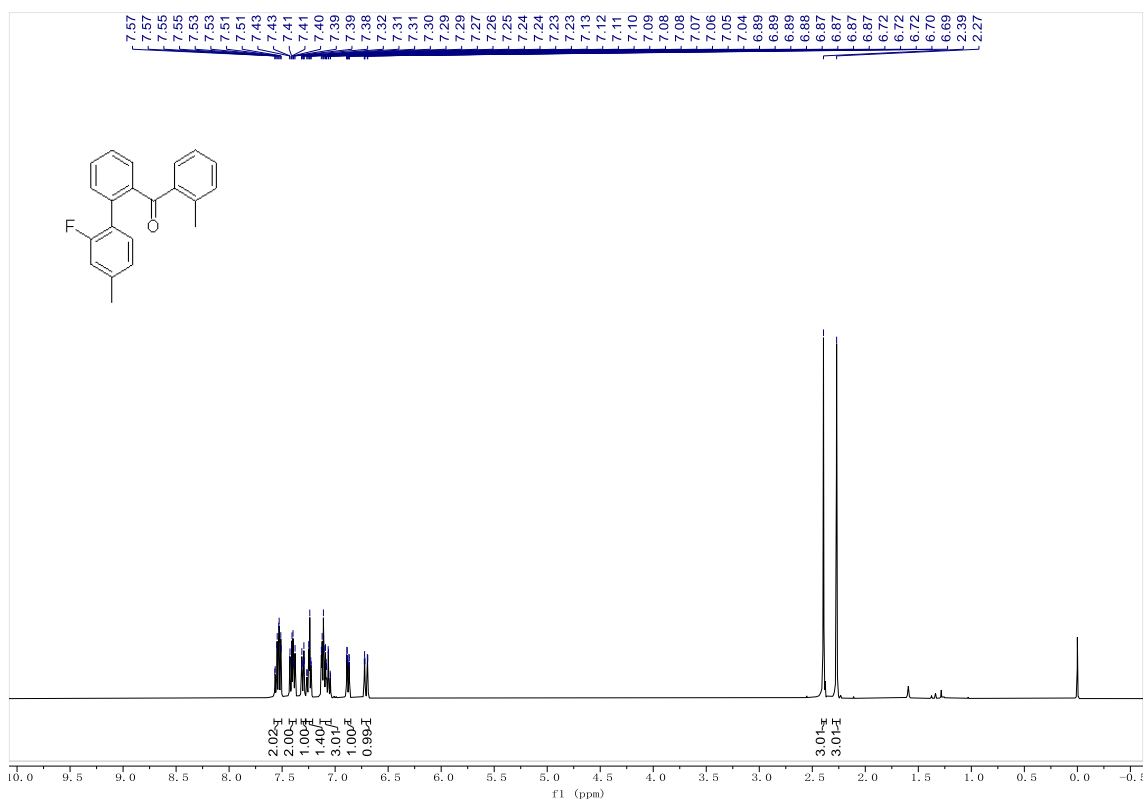

**<sup>13</sup>C NMR of 11 (101 MHz, Chloroform-*d*)**

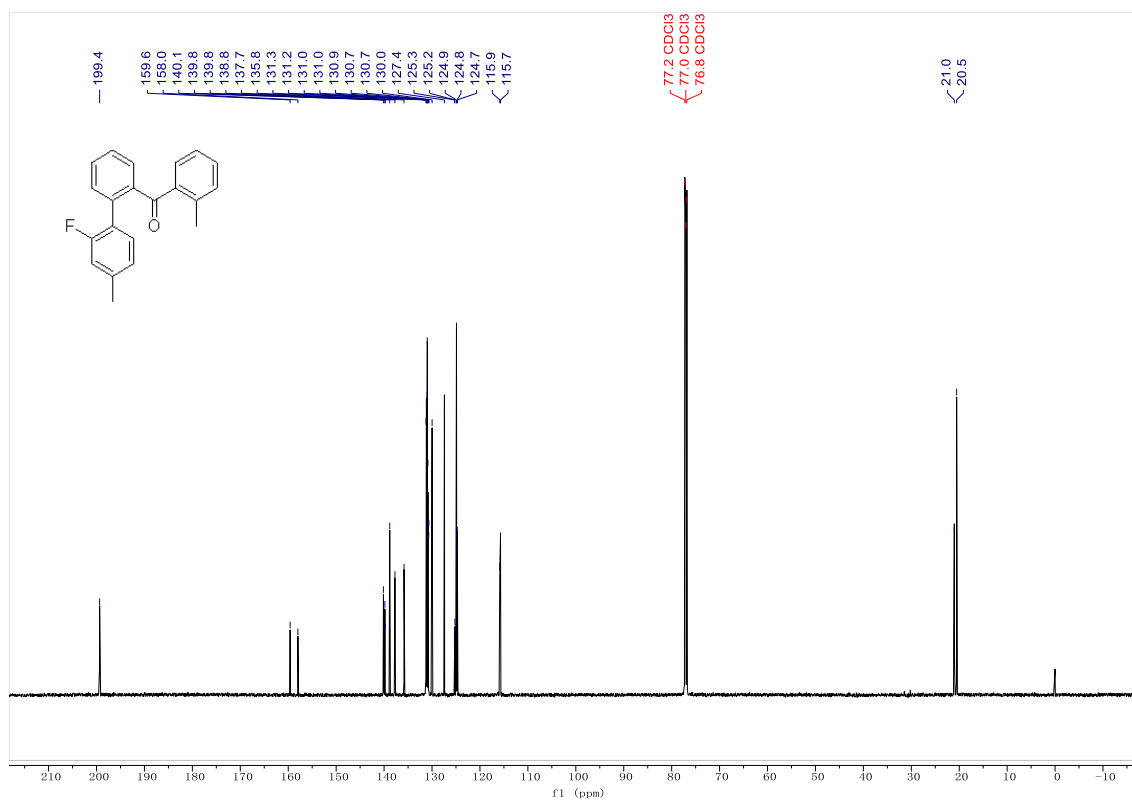

**<sup>19</sup>F NMR of 11 (400 MHz, Chloroform-*d*)**

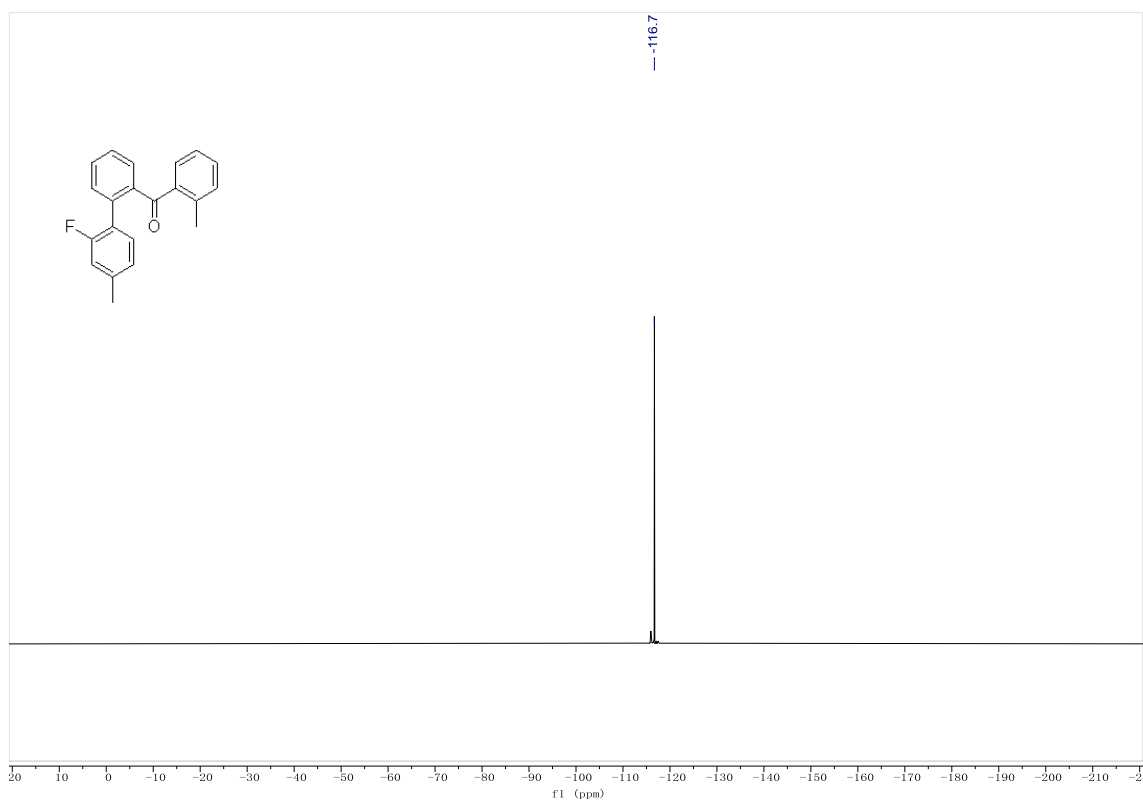



**<sup>19</sup>F NMR of 1m (400 MHz, Chloroform-*d*)**

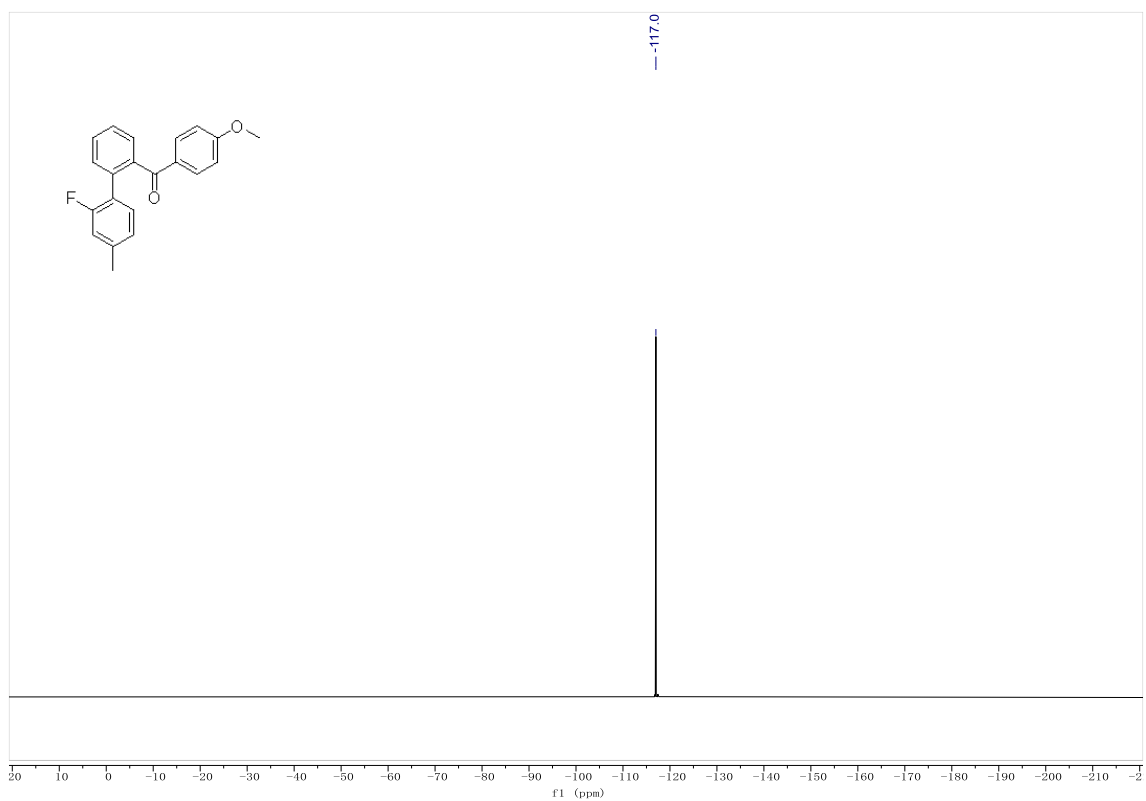

**<sup>1</sup>H NMR of 1n (400 MHz, Chloroform-*d*)**

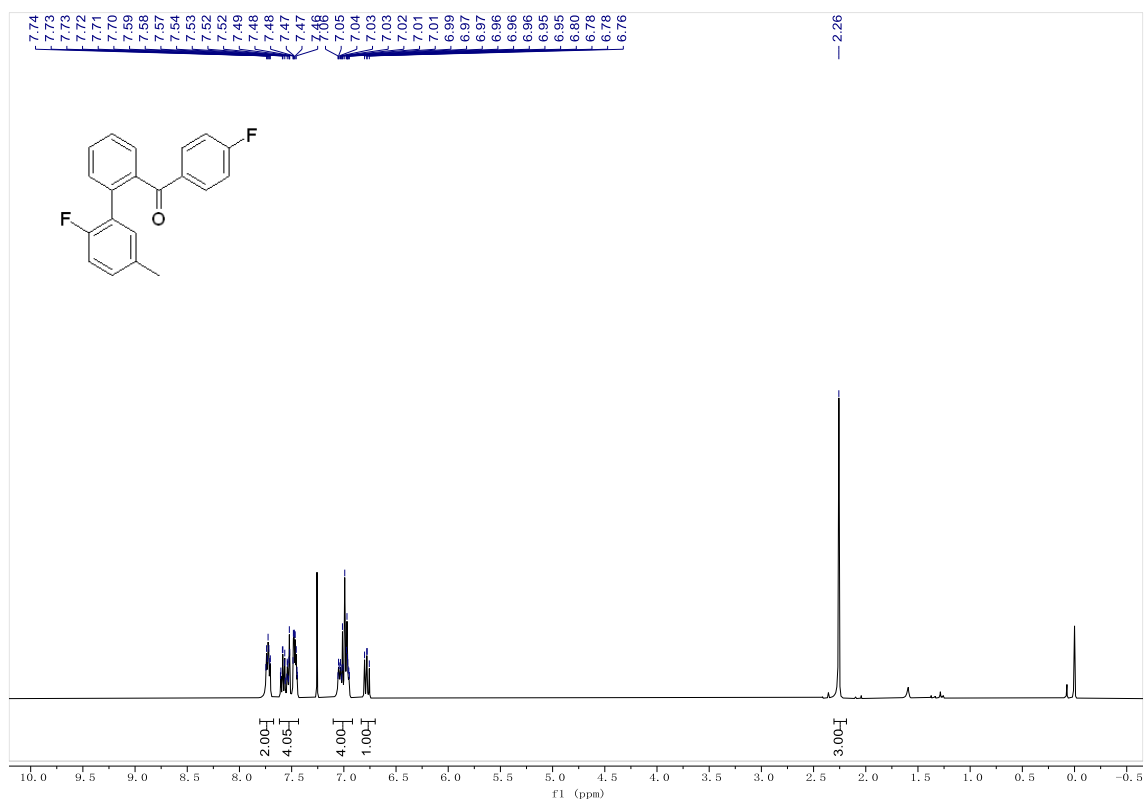

**<sup>13</sup>C NMR of 1n (101 MHz, Chloroform-*d*)**

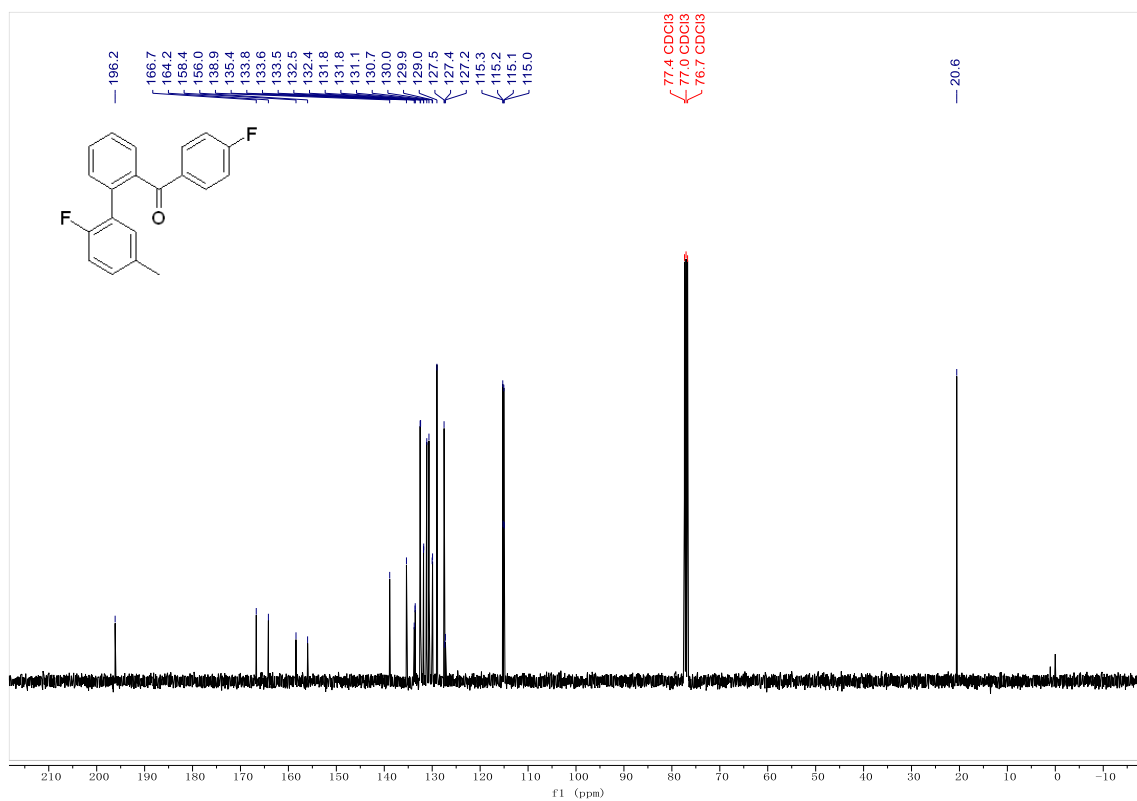

**<sup>19</sup>F NMR of 1n (400 MHz, Chloroform-*d*)**

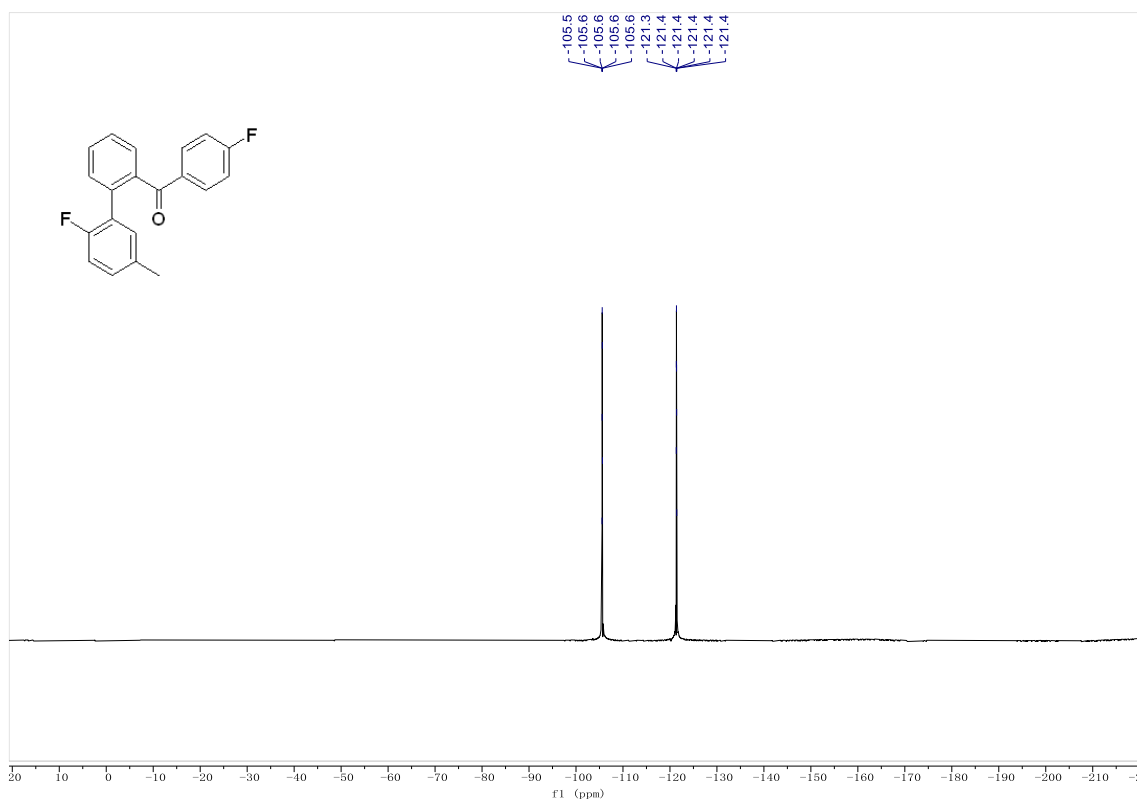

### <sup>1</sup>H NMR of 1o (400 MHz, Chloroform-d)

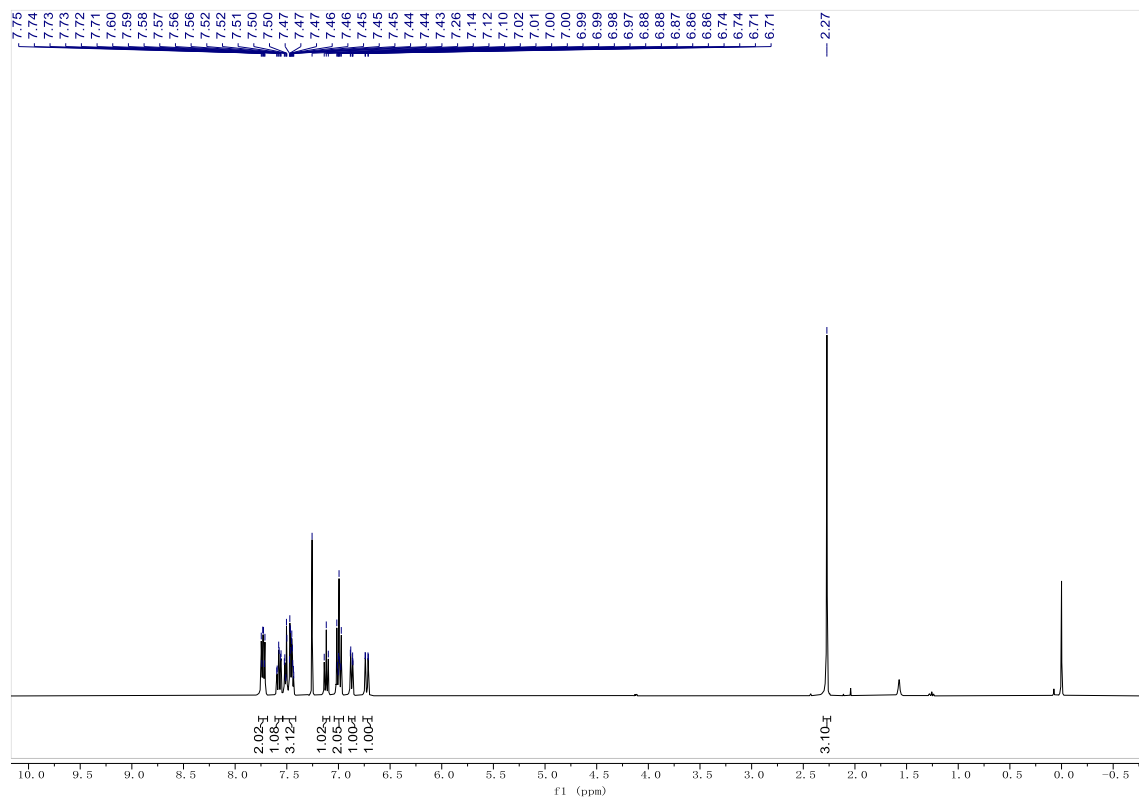

### <sup>13</sup>C NMR of 1o (101 MHz, Chloroform-d)

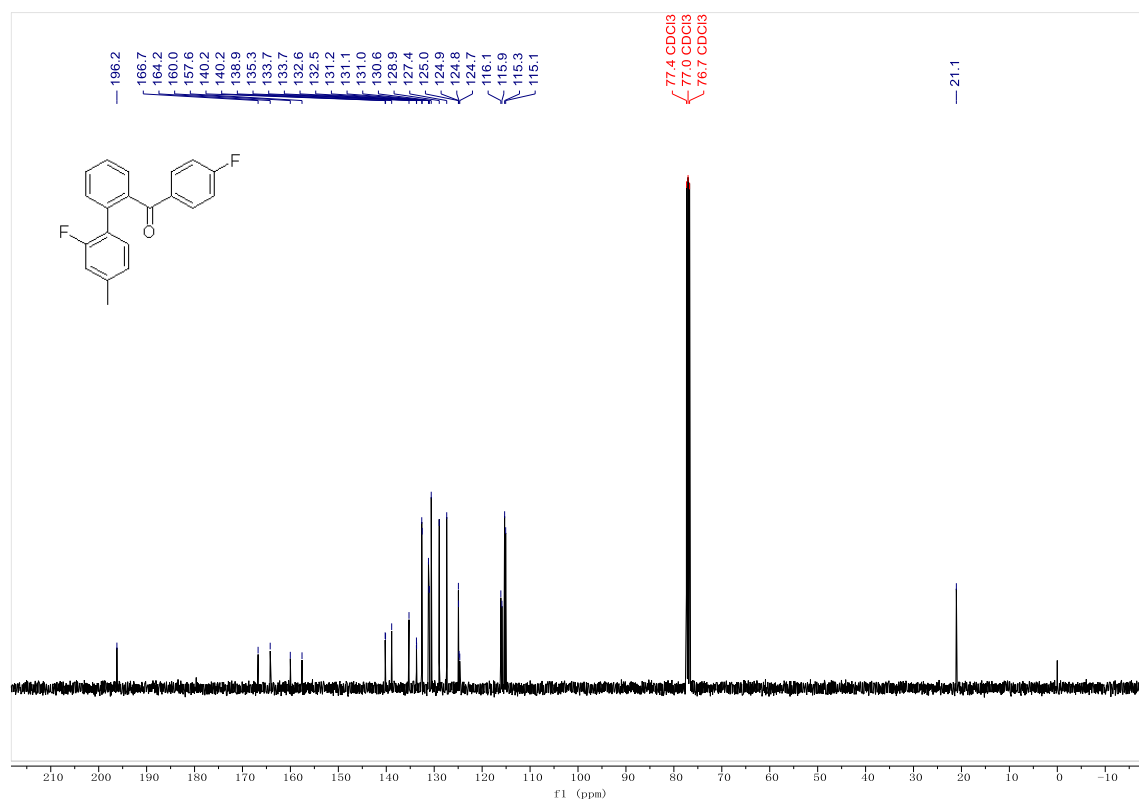



**<sup>19</sup>F NMR of 1o (400 MHz, Chloroform-*d*)**

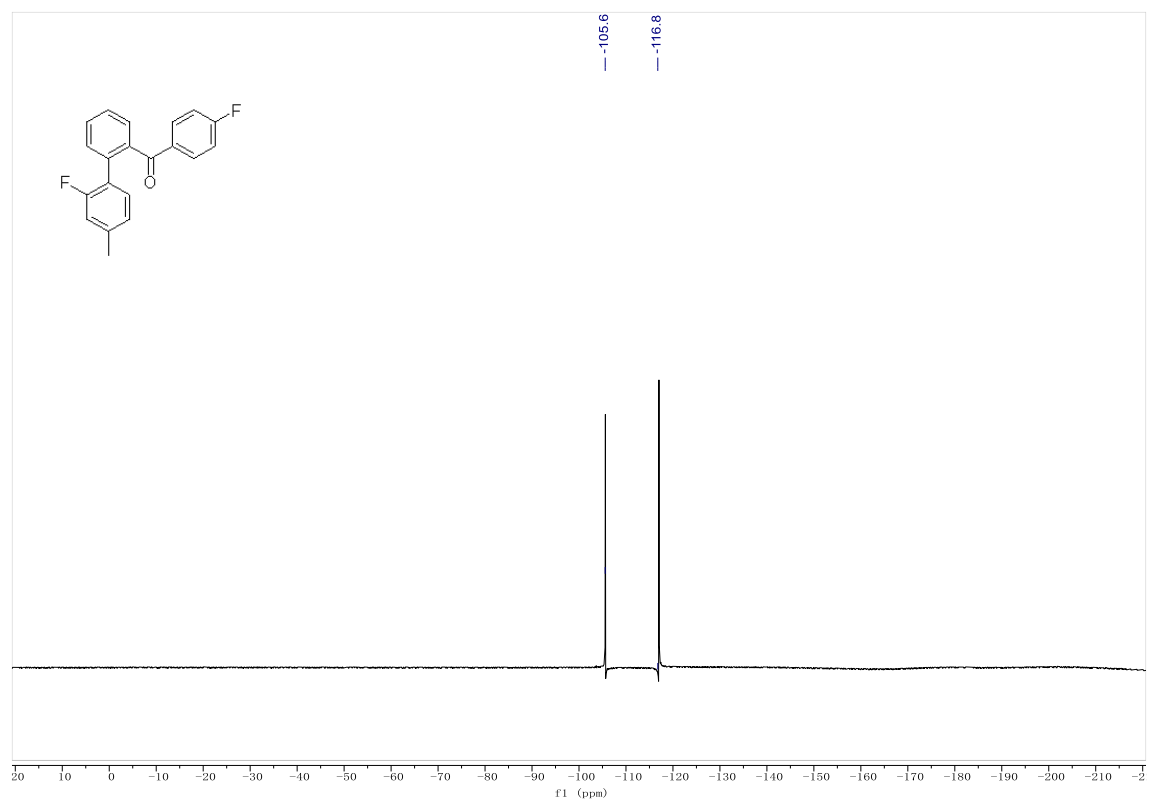

**<sup>1</sup>H NMR of 2a (400 MHz, Chloroform-*d*)**

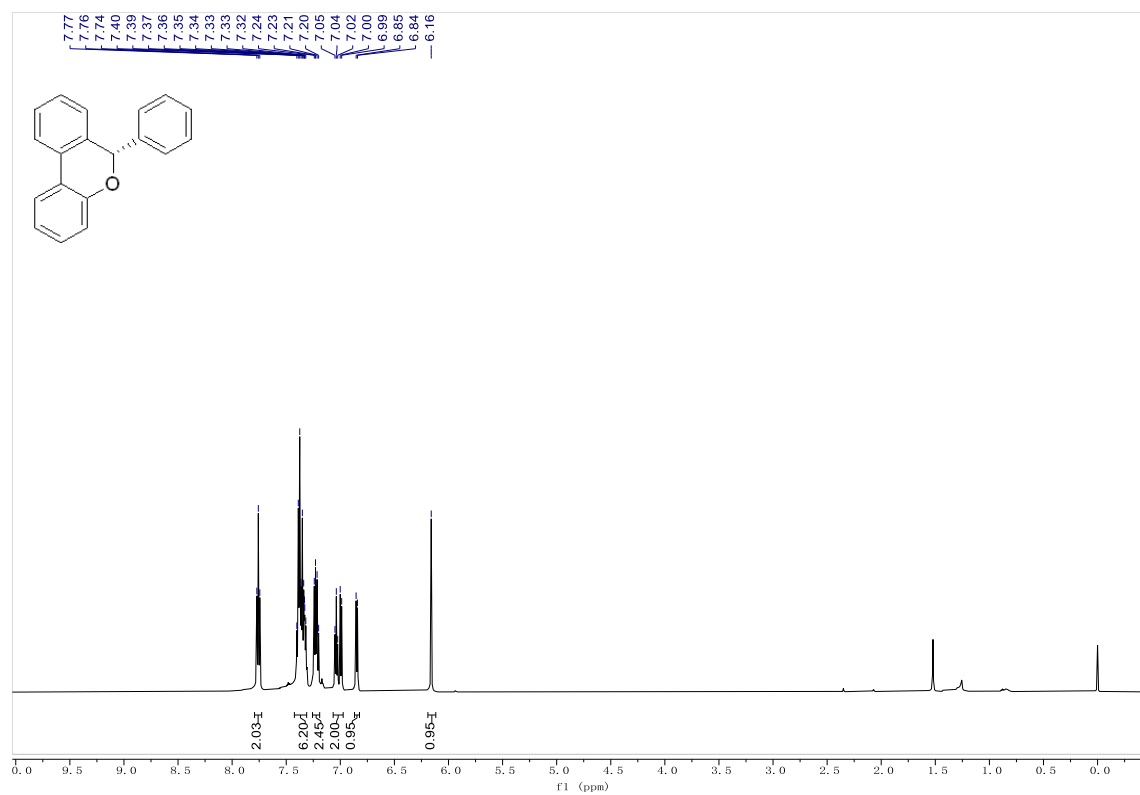

**<sup>13</sup>C NMR of 2a (151 MHz, Chloroform-*d*)**

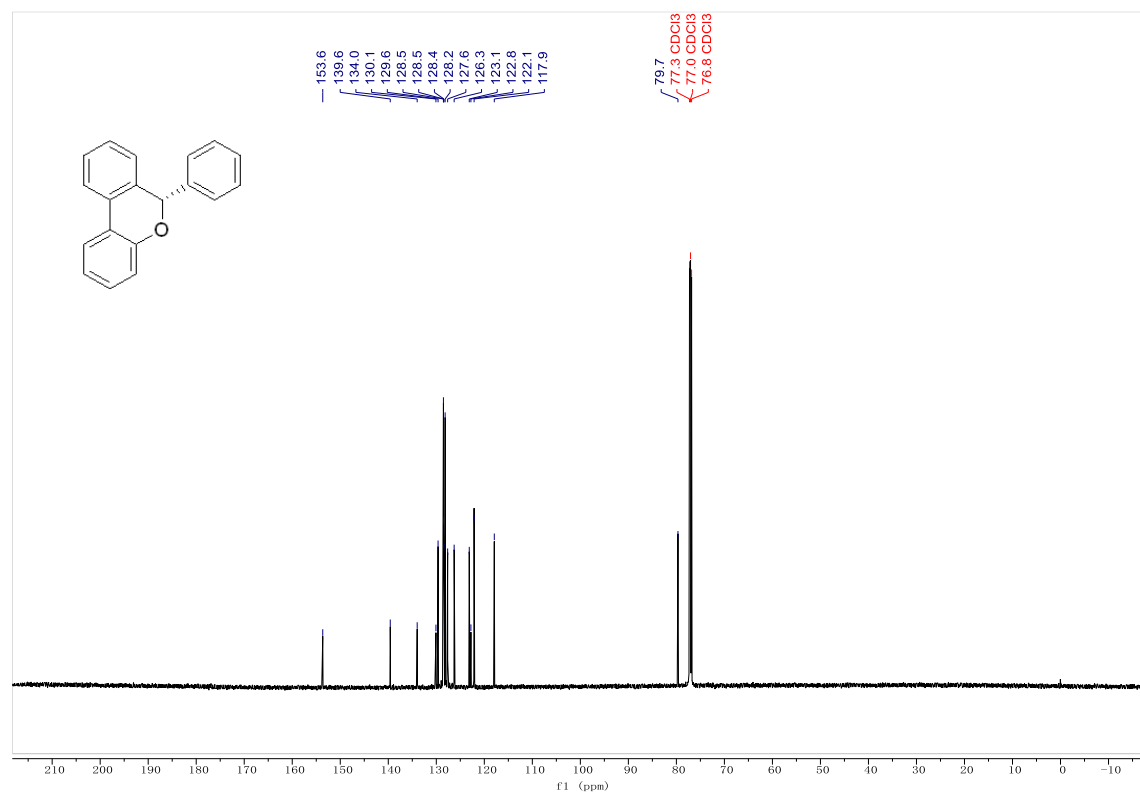

**<sup>1</sup>H NMR of 2b (400 MHz, Chloroform-*d*)**

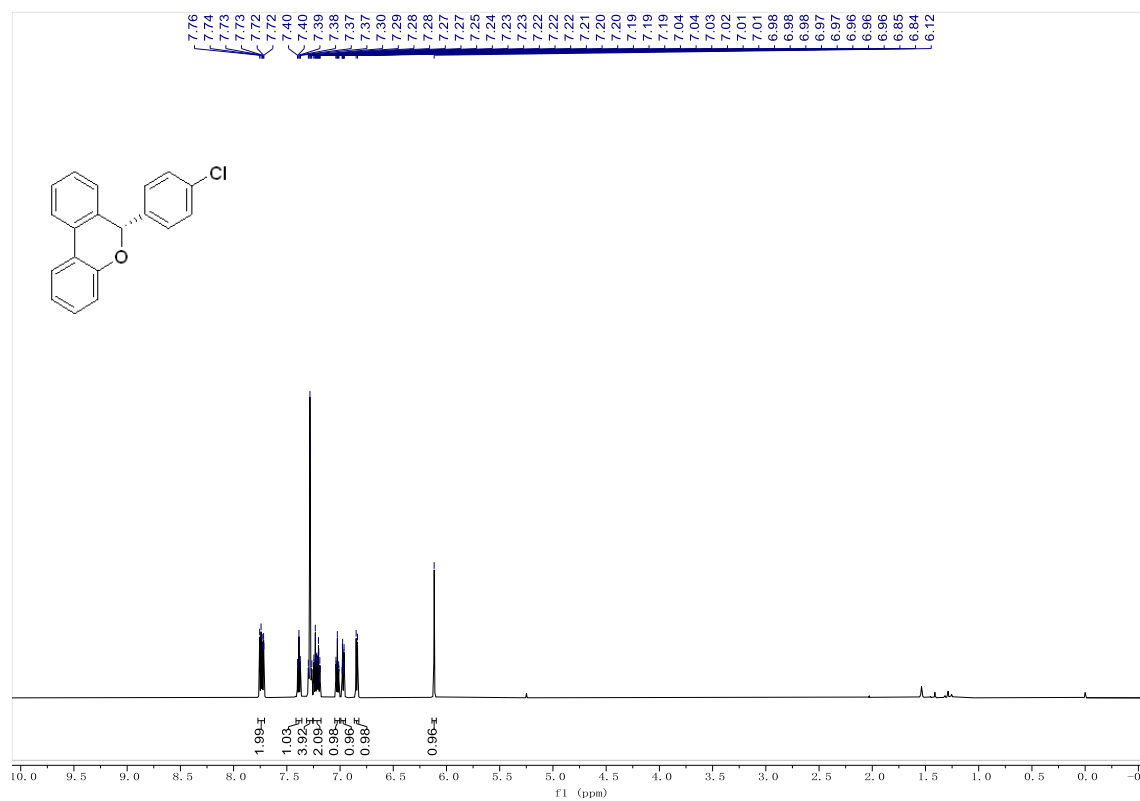

**<sup>13</sup>C NMR of 2b (151 MHz, Chloroform-*d*)**

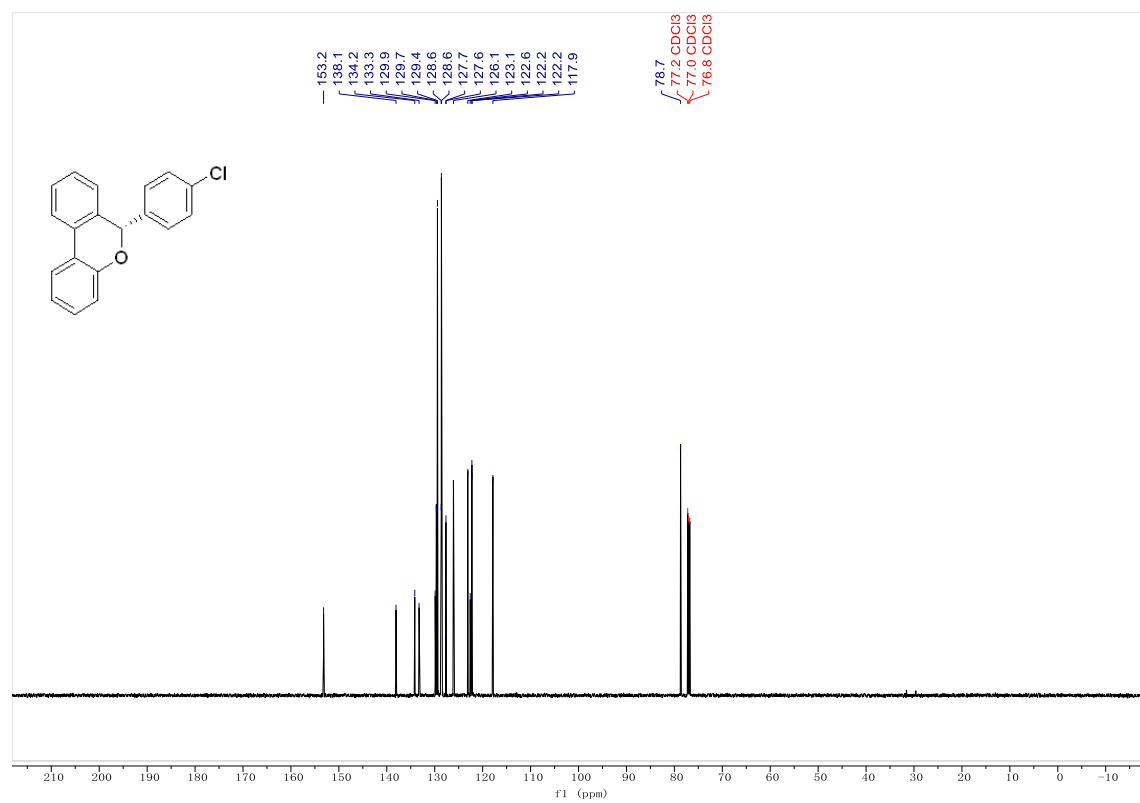



**<sup>19</sup>F NMR of 2c (400 MHz, Chloroform-*d*)**

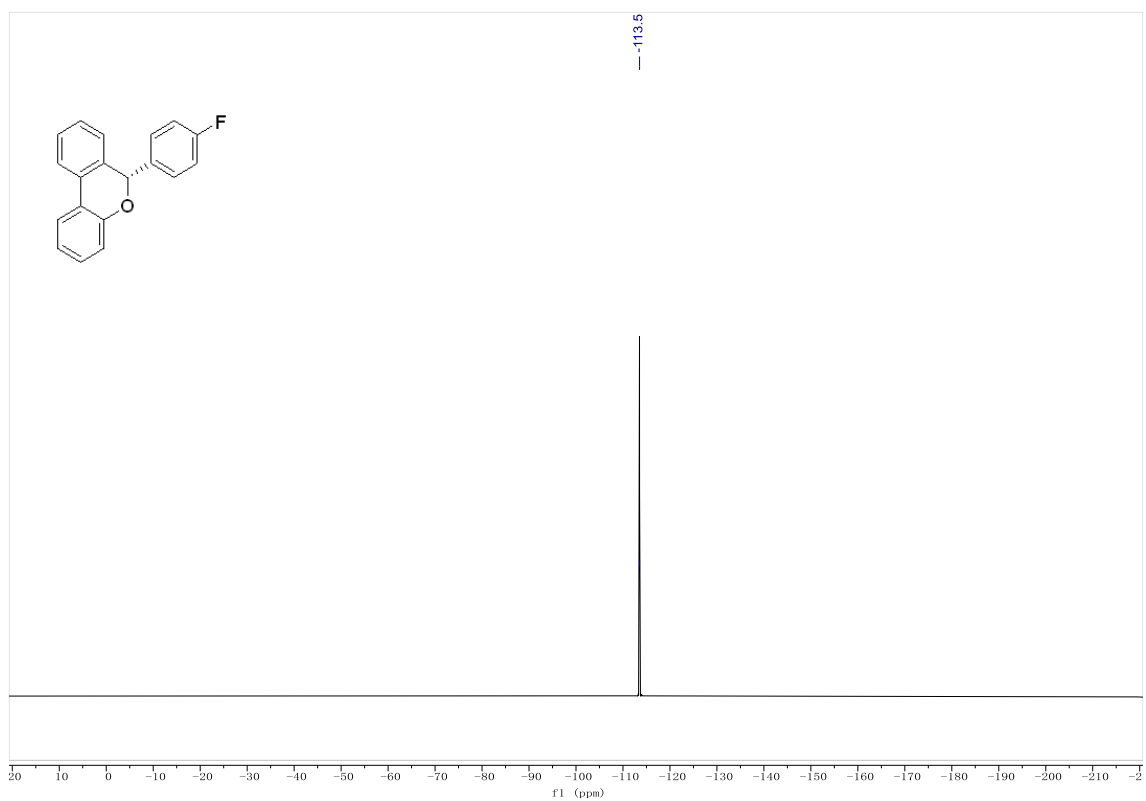

**<sup>1</sup>H NMR of 2d (400 MHz, Chloroform-*d*)**

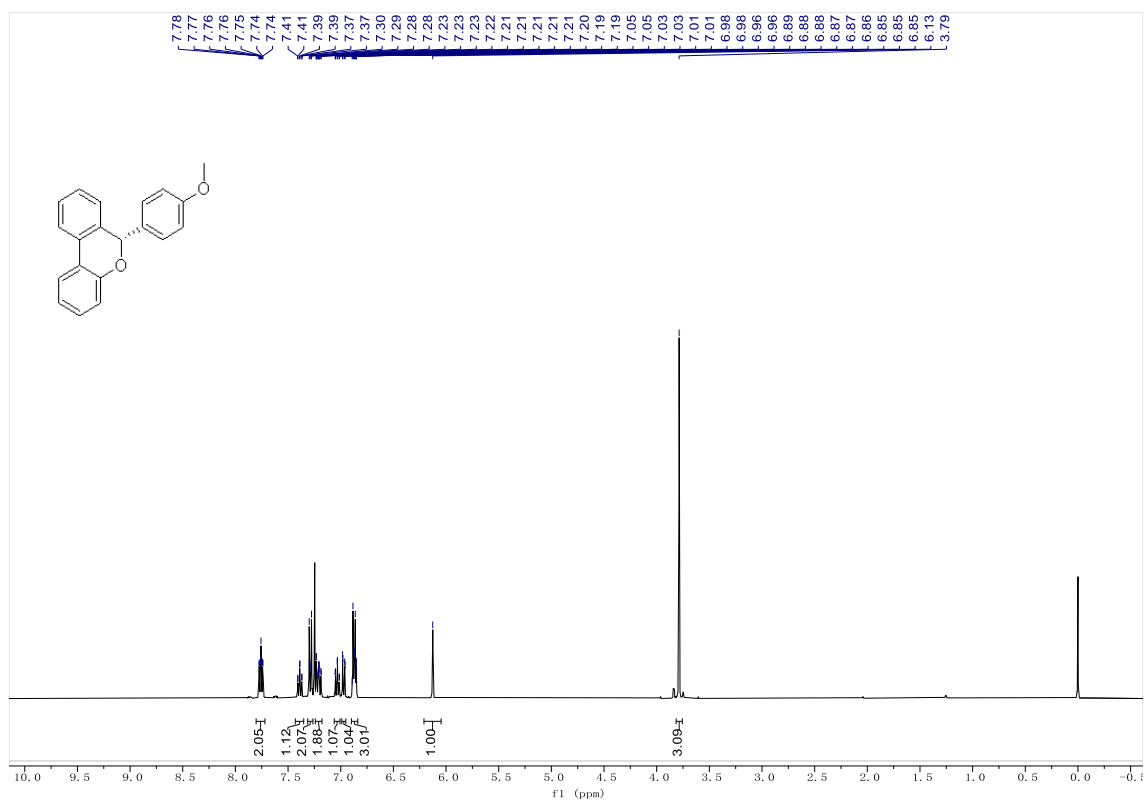



**<sup>13</sup>C NMR of 2e (101 MHz, Chloroform-*d*)**

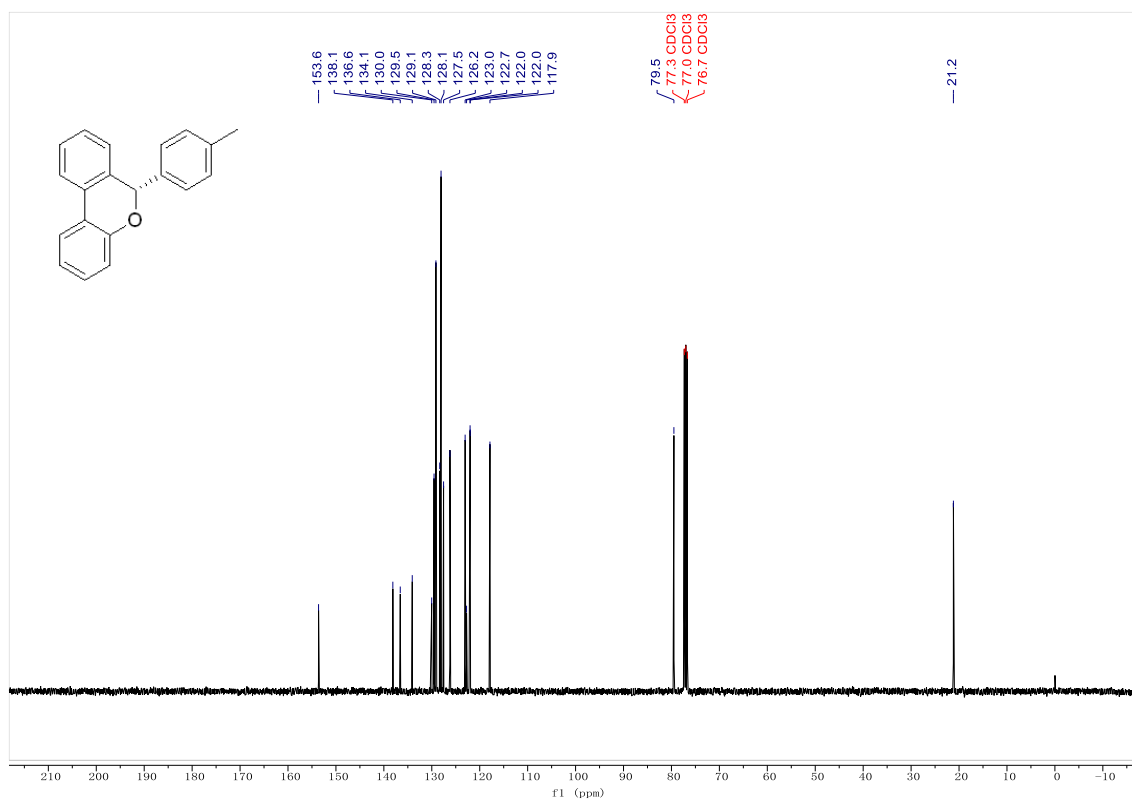

**<sup>1</sup>H NMR of 2f (400 MHz, Chloroform-*d*)**

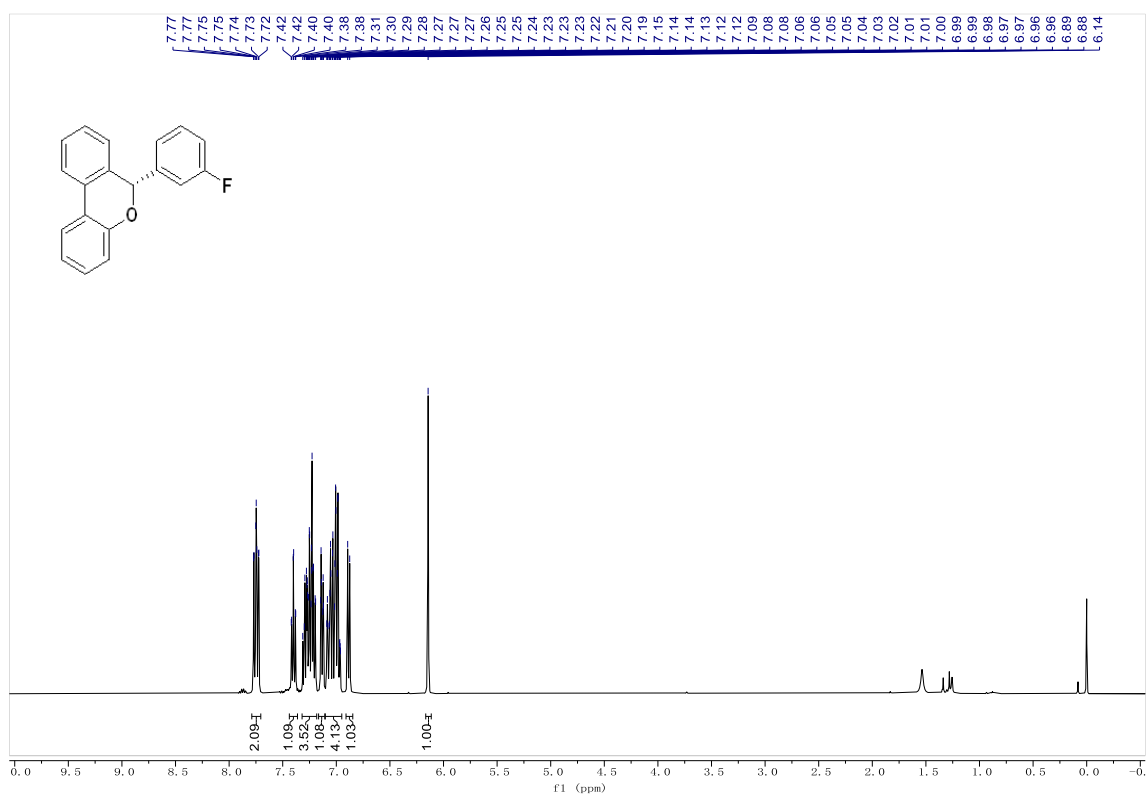

**<sup>13</sup>C NMR of 2f (101 MHz, Chloroform-*d*)**

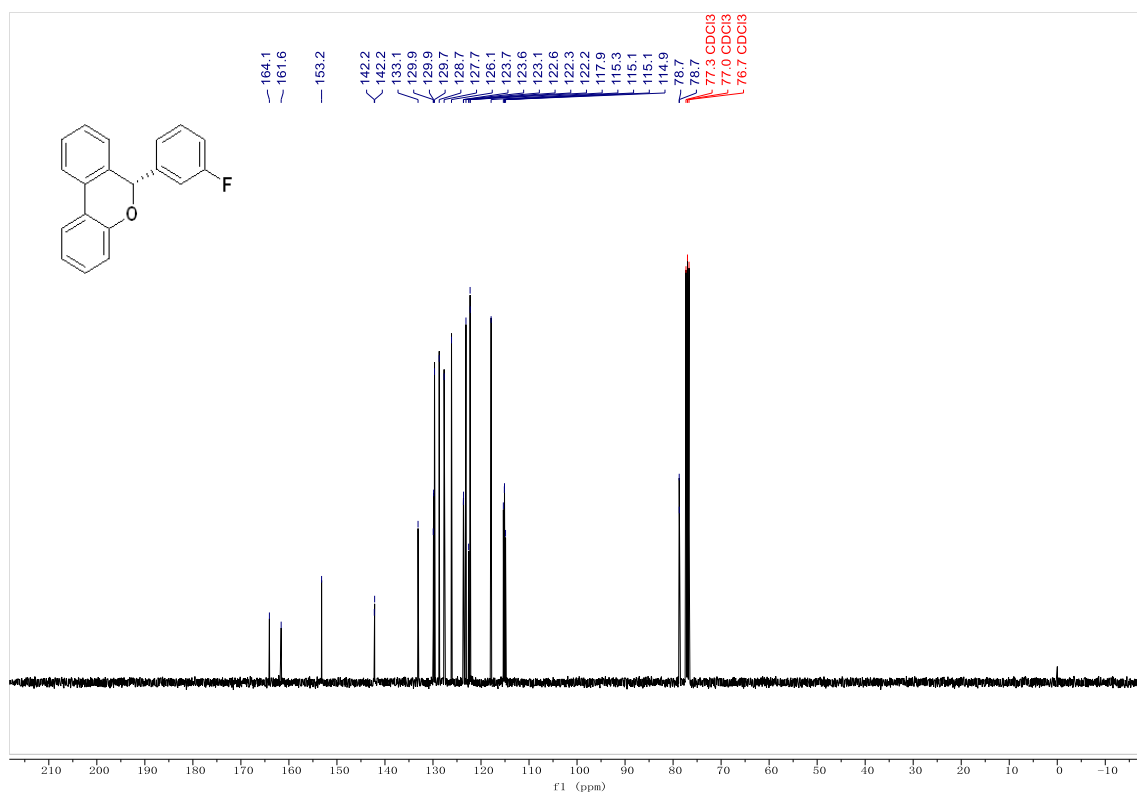

**<sup>19</sup>F NMR of 2f (400 MHz, Chloroform-*d*)**

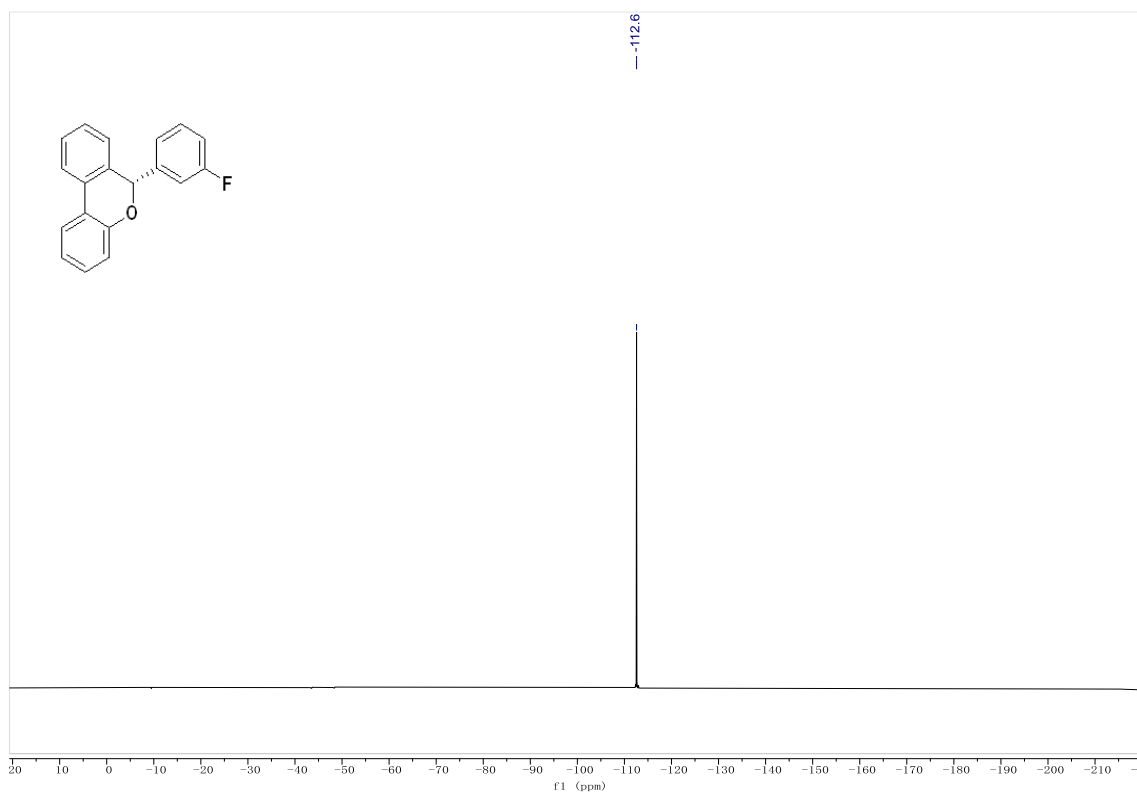



### <sup>1</sup>H NMR of 2g (400 MHz, Chloroform-*d*)

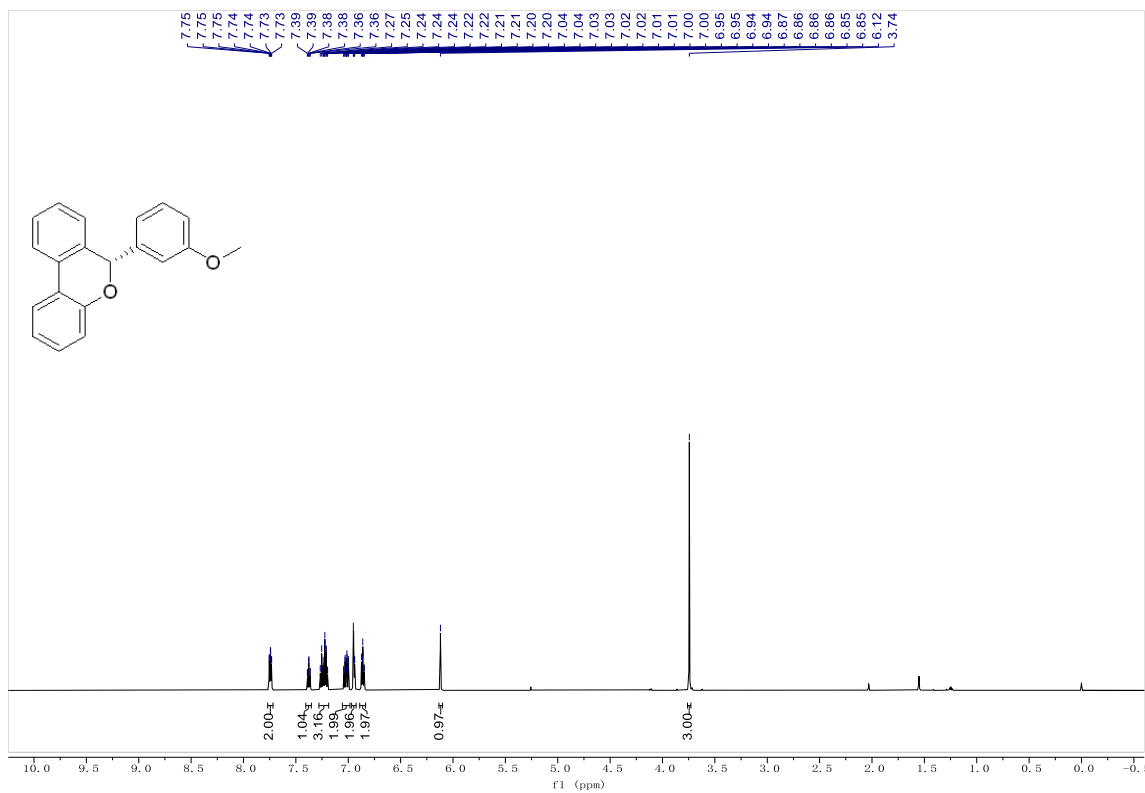

### <sup>13</sup>C NMR of 2g (101 MHz, Chloroform-*d*)

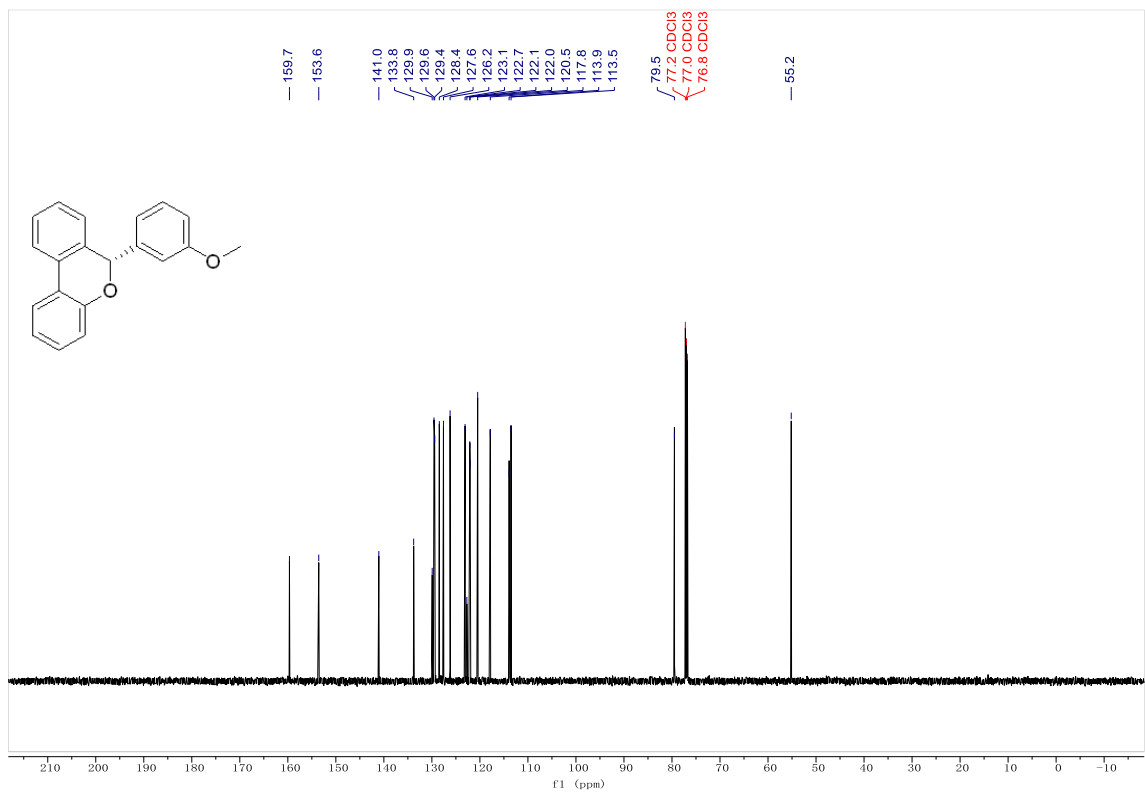

### <sup>1</sup>H NMR of 2h (400 MHz, Chloroform-*d*)

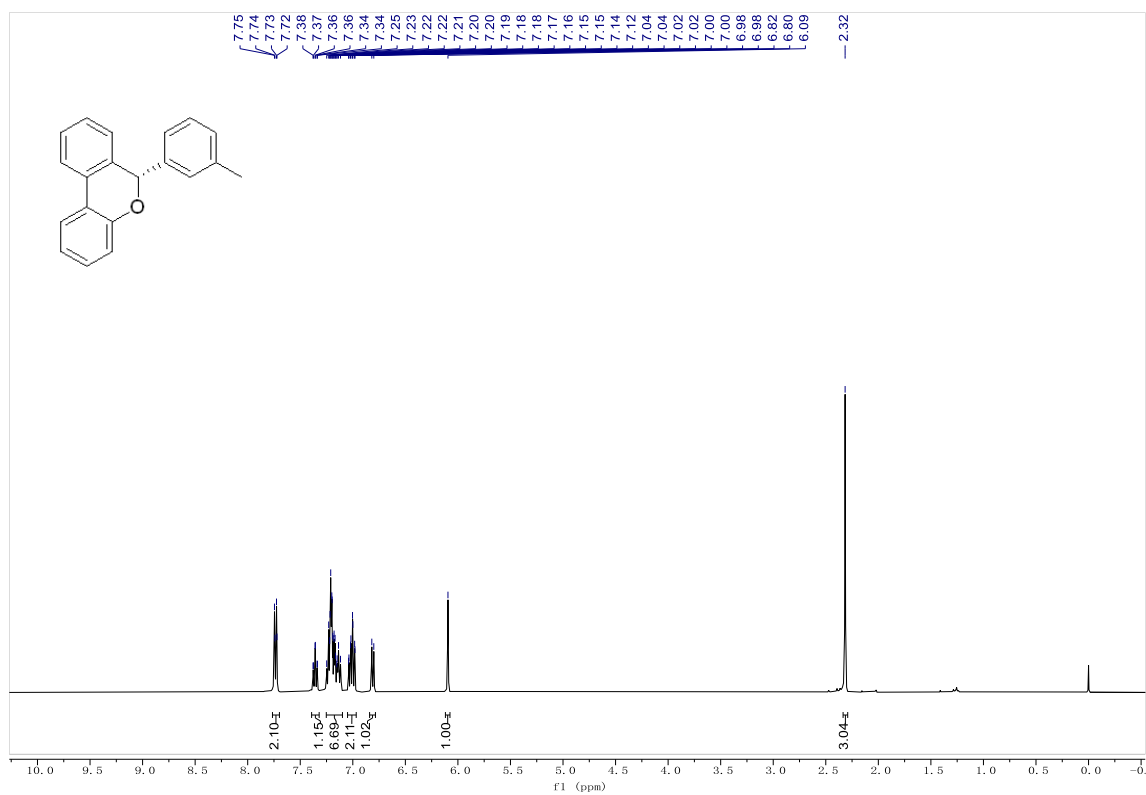

### <sup>13</sup>C NMR of 2h (101 MHz, Chloroform-*d*)

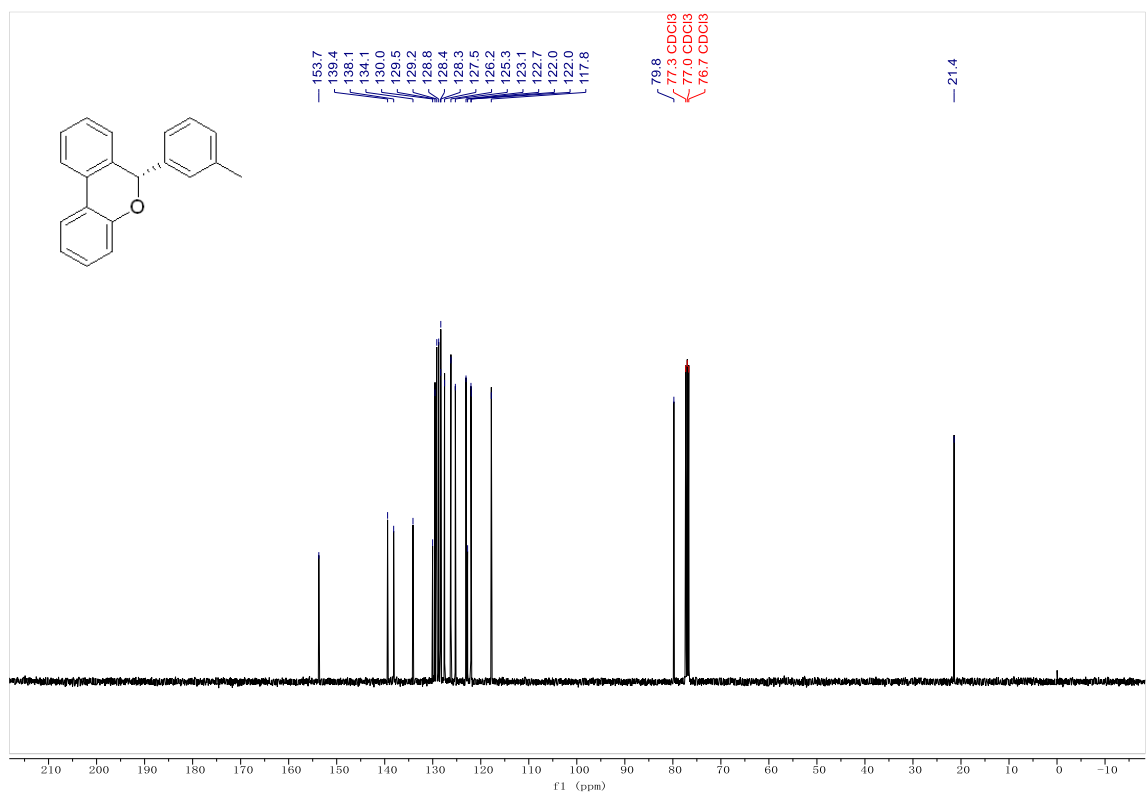

**<sup>1</sup>H NMR of 2i (400 MHz, Chloroform-*d*)**

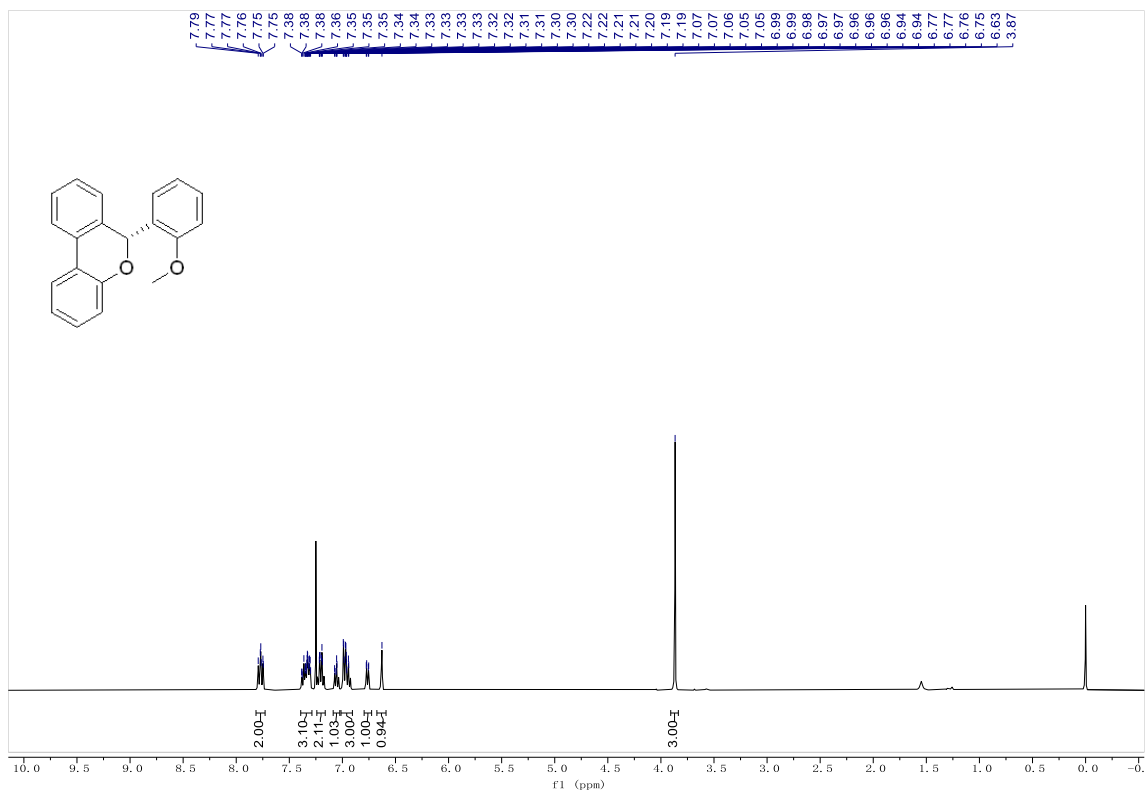

**<sup>13</sup>C NMR of 2i (101 MHz, Chloroform-*d*)**

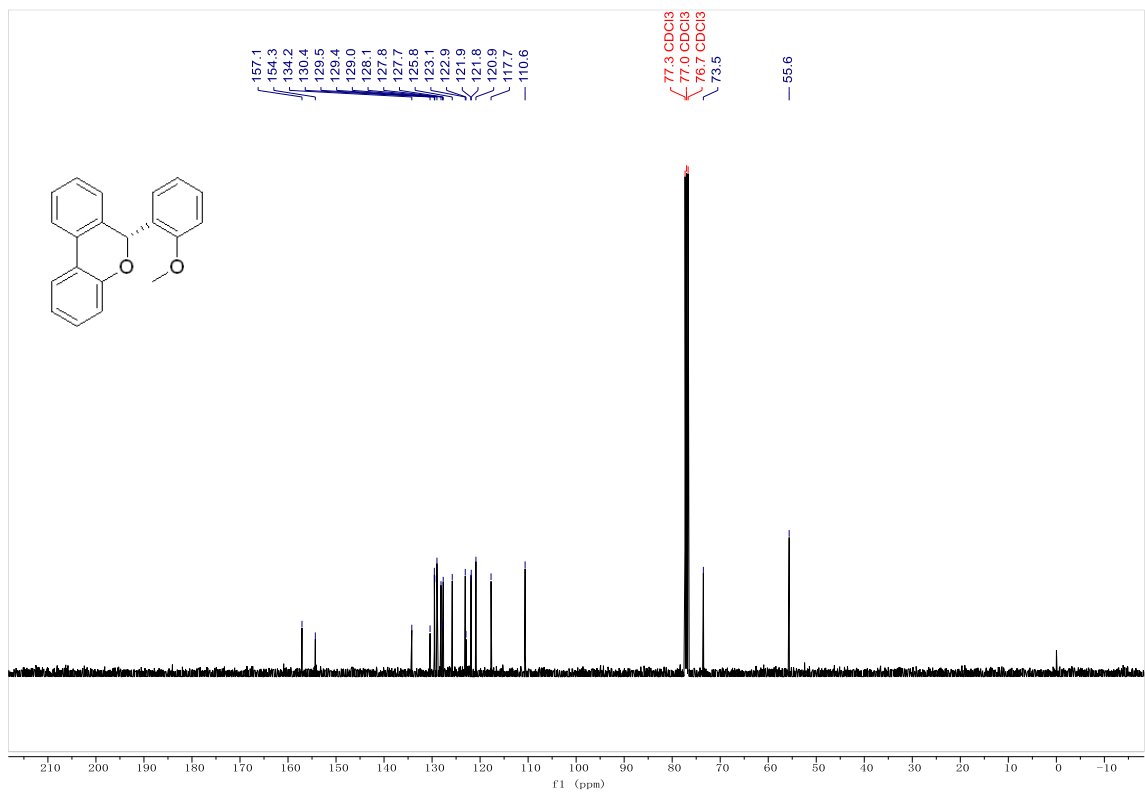



**<sup>1</sup>H NMR of 2k (400 MHz, Chloroform-*d*)**

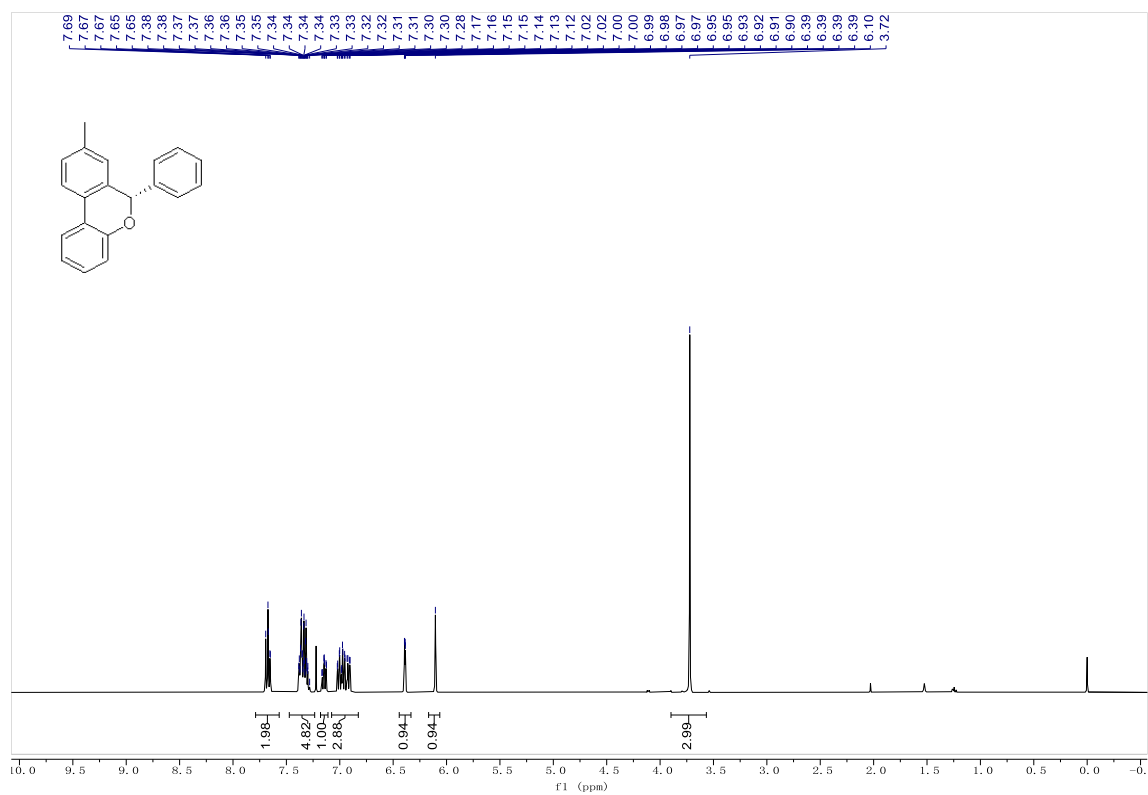

**<sup>13</sup>C NMR of 2k (101 MHz, Chloroform-*d*)**

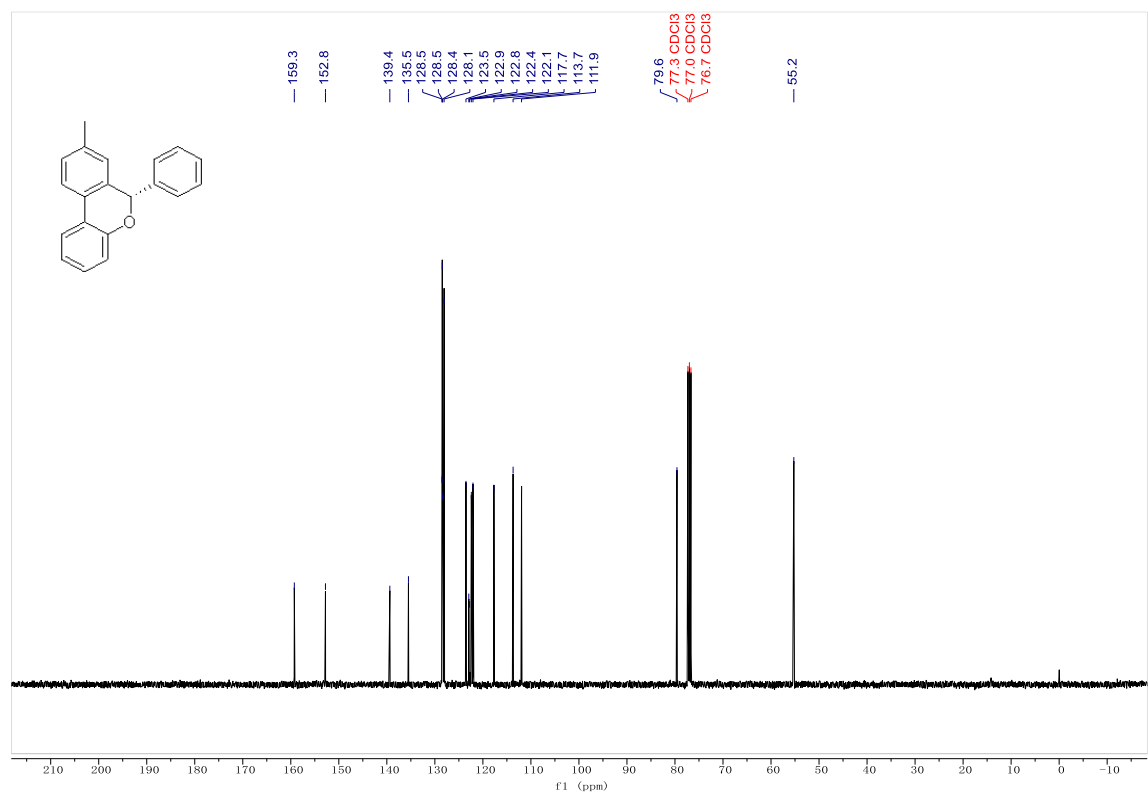

**<sup>1</sup>H NMR of 2l (400 MHz, Chloroform-*d*)**

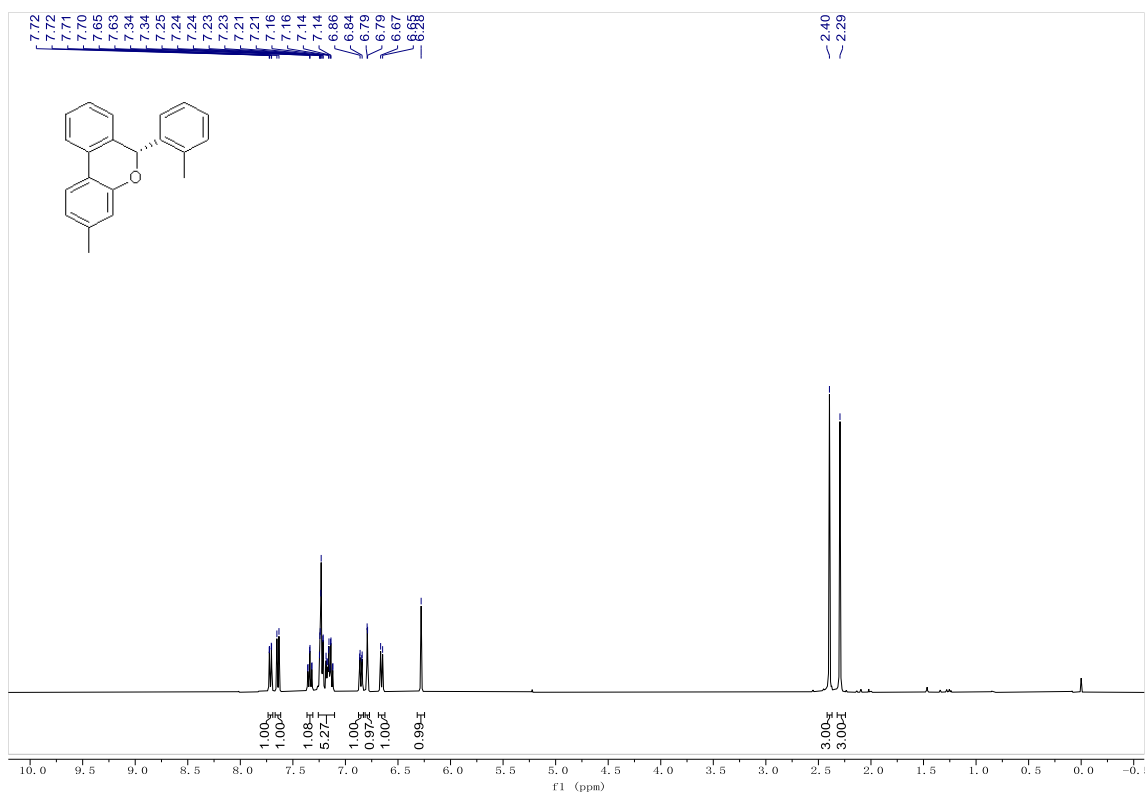

**<sup>13</sup>C NMR of 2l (101 MHz, Chloroform-*d*)**

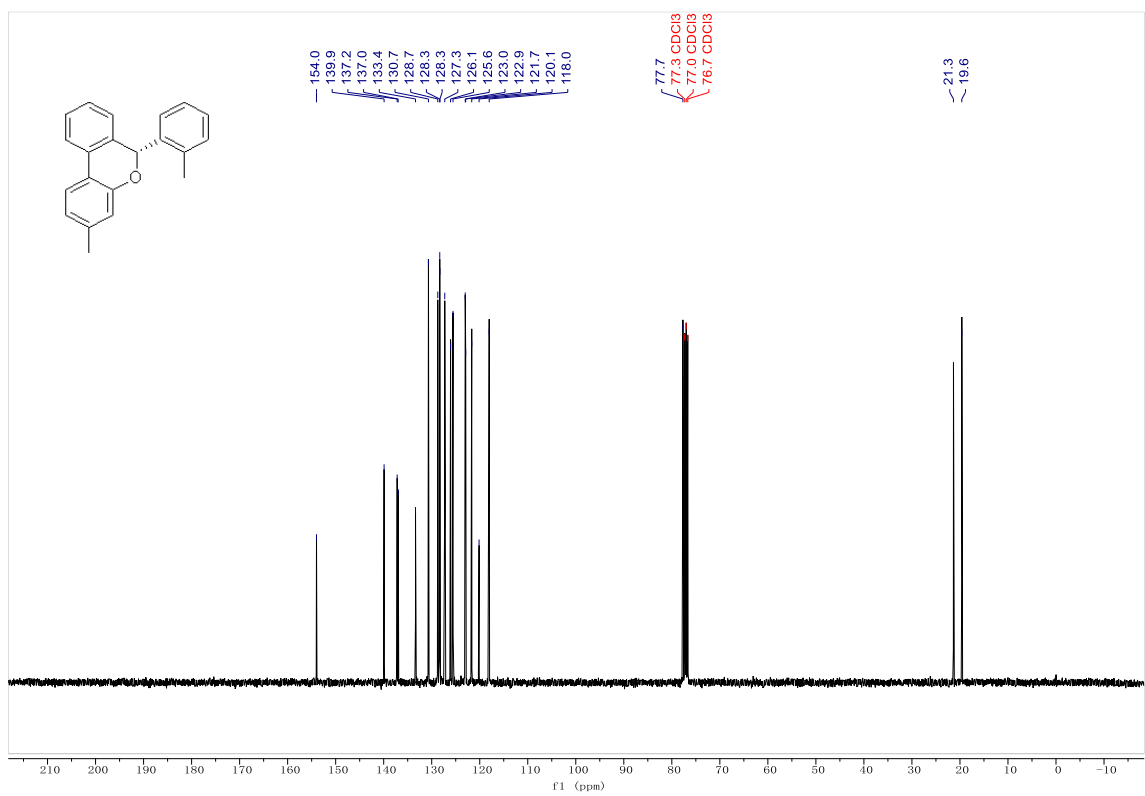

**<sup>1</sup>H NMR of 2i (400 MHz, Chloroform-*d*)**

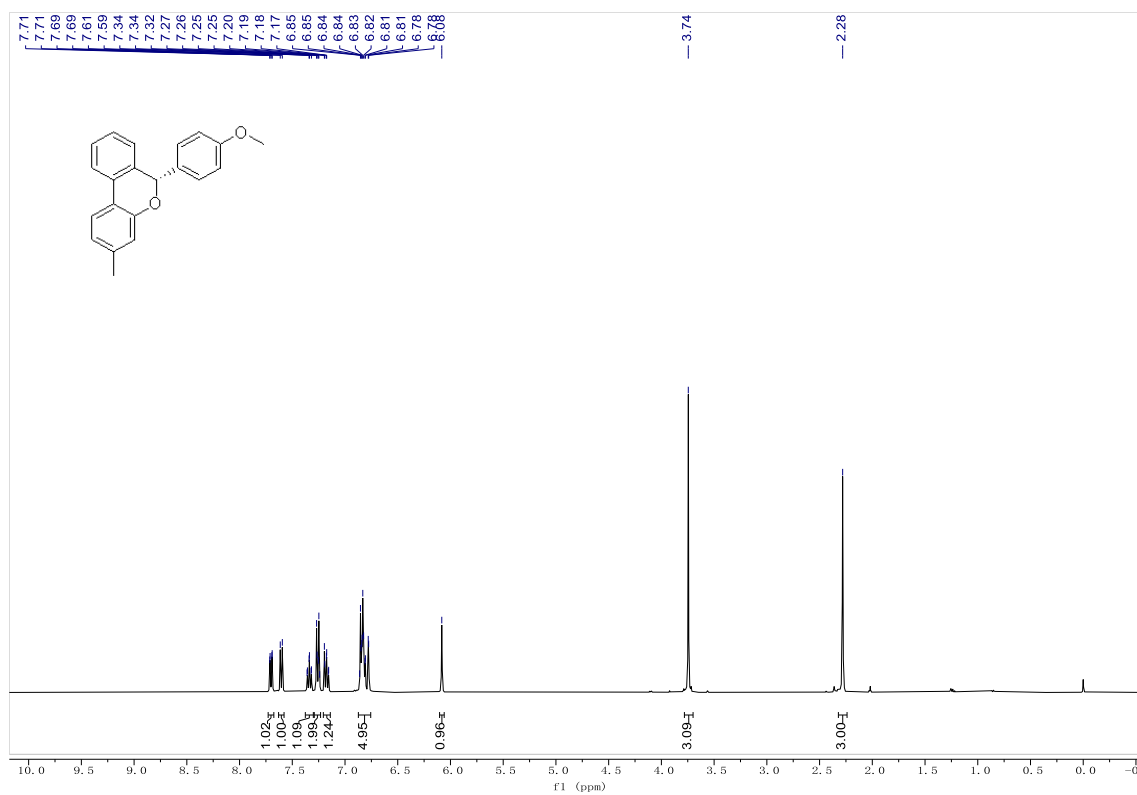

**<sup>13</sup>C NMR of 2i (101 MHz, Chloroform-*d*)**

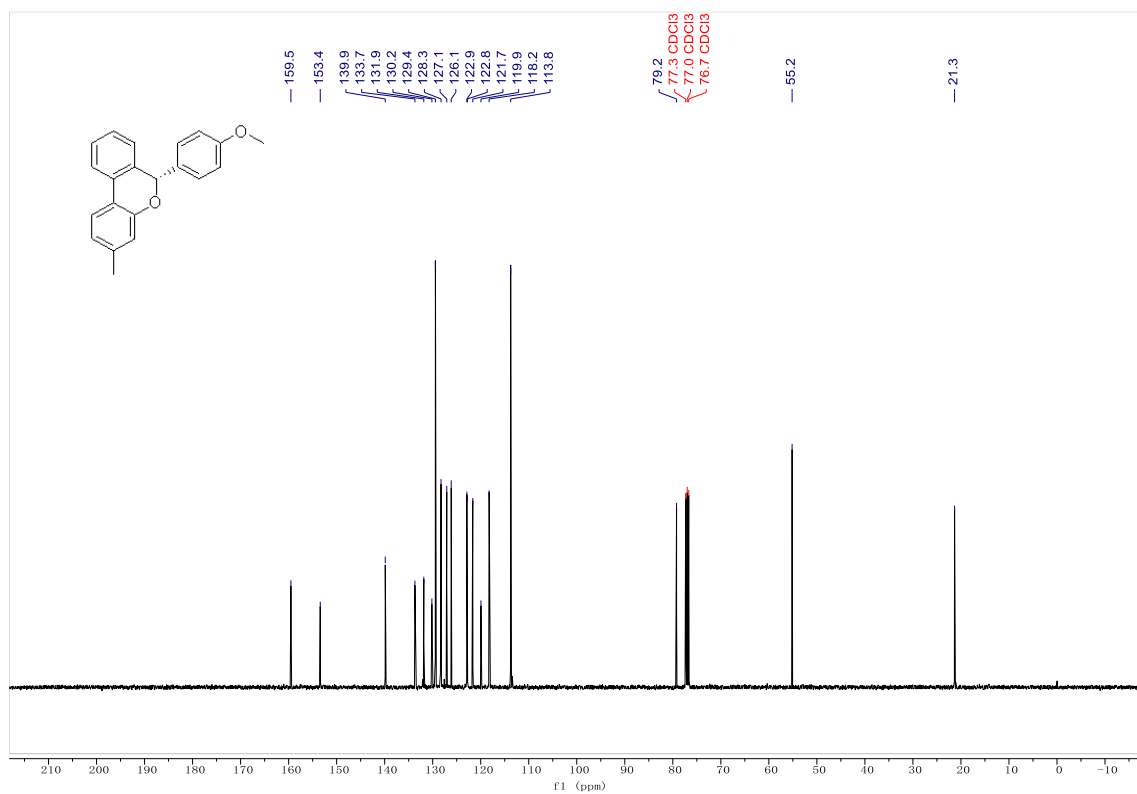

**<sup>1</sup>H NMR of 2j (400 MHz, Chloroform-*d*)**

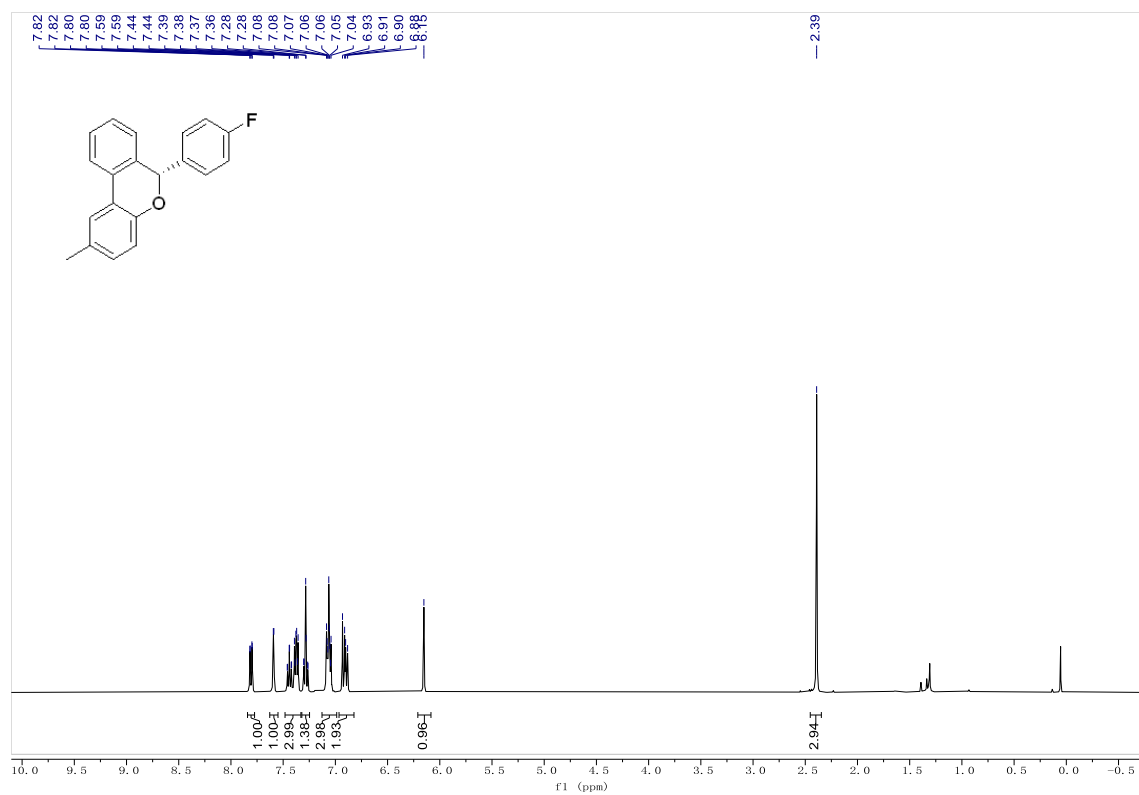

**<sup>13</sup>C NMR of 2j (101 MHz, Chloroform-*d*)**

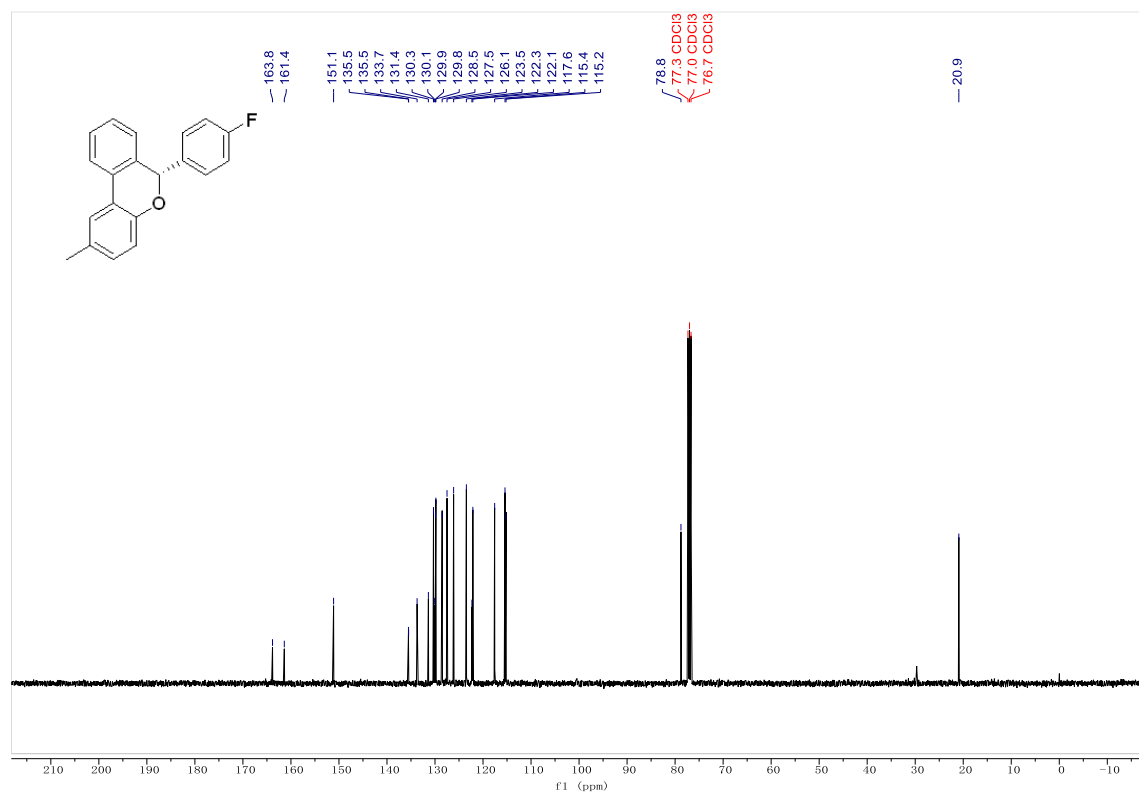



**<sup>19</sup>F NMR of 2j (400 MHz, Chloroform-*d*)**

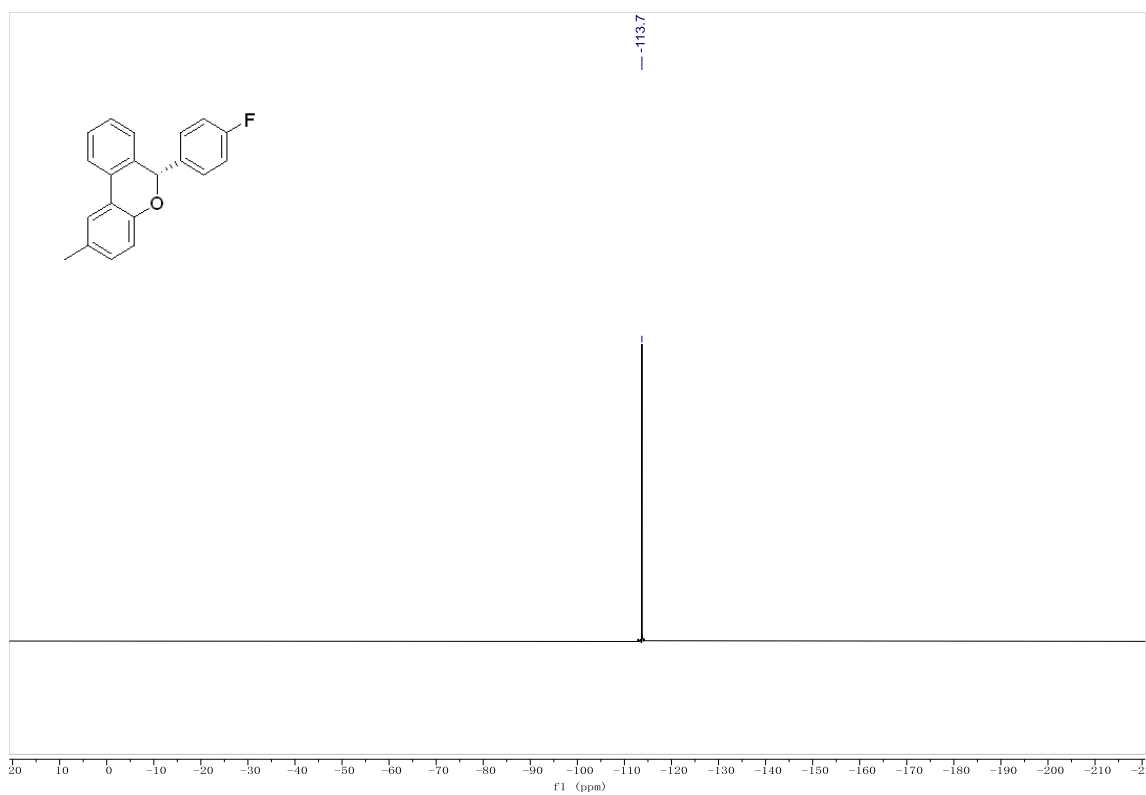

**<sup>1</sup>H NMR of 2i (400 MHz, Chloroform-*d*)**

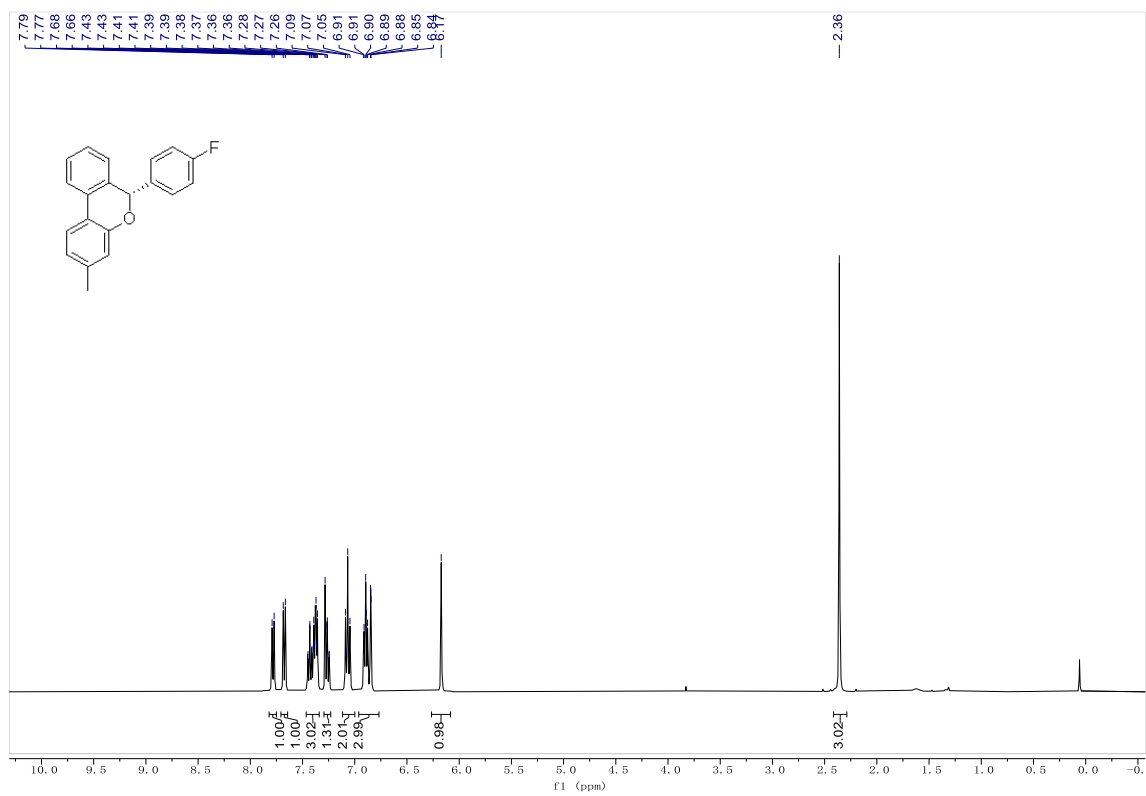

**<sup>13</sup>C NMR of 2i (101 MHz, Chloroform-*d*)**

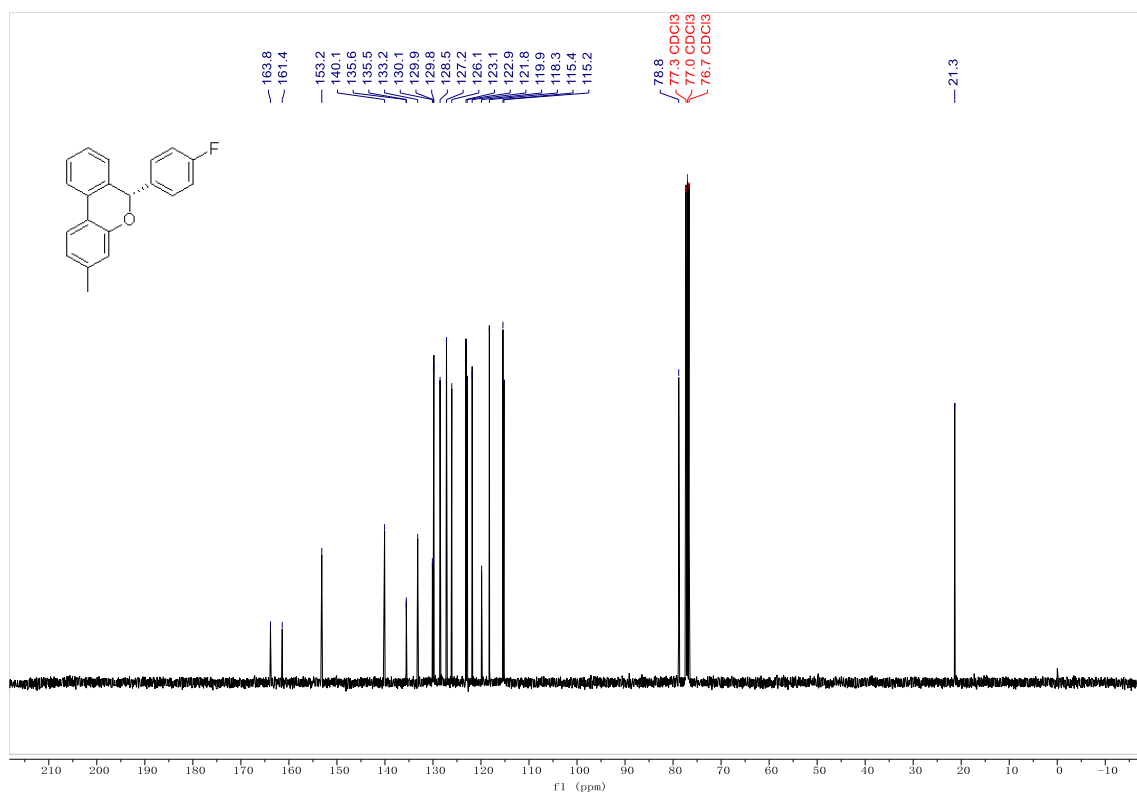

**<sup>19</sup>F NMR of 2a (400 MHz, Chloroform-*d*)**

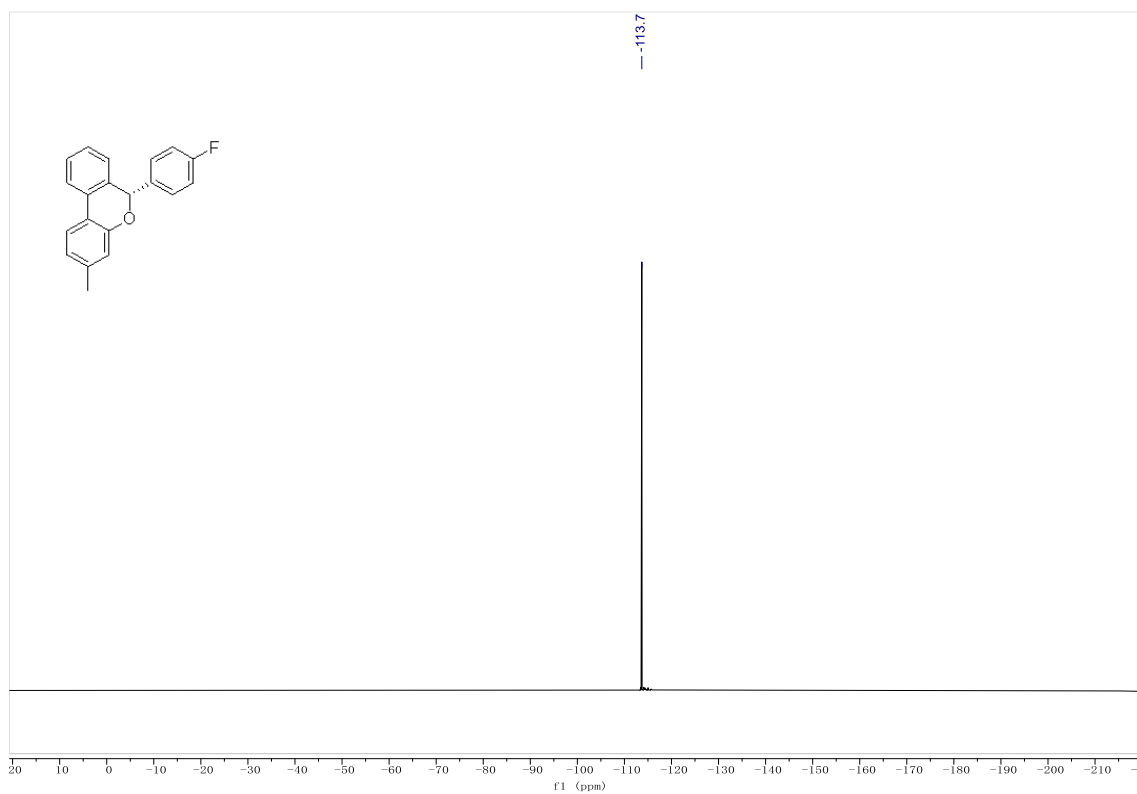

<sup>1</sup>H NMR (400 MHz, CDCl<sub>3</sub>) of **2p**

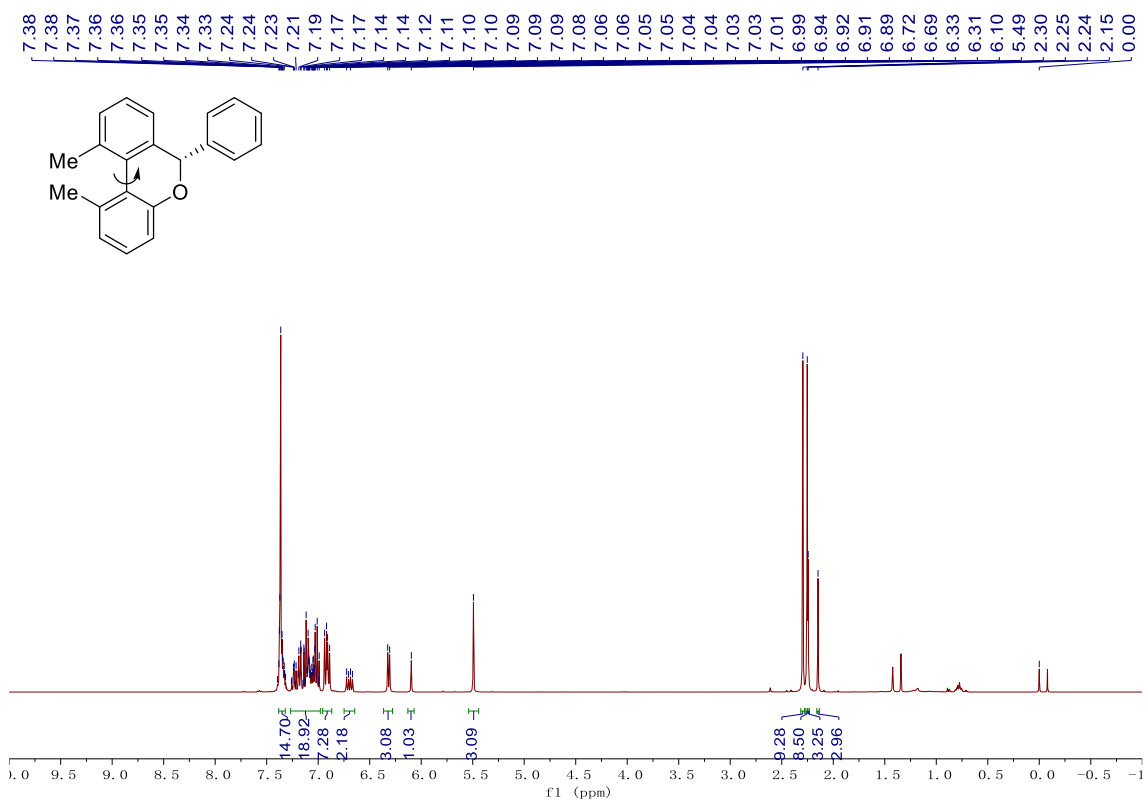

<sup>13</sup>C NMR (100 MHz, CDCl<sub>3</sub>) of **2p**

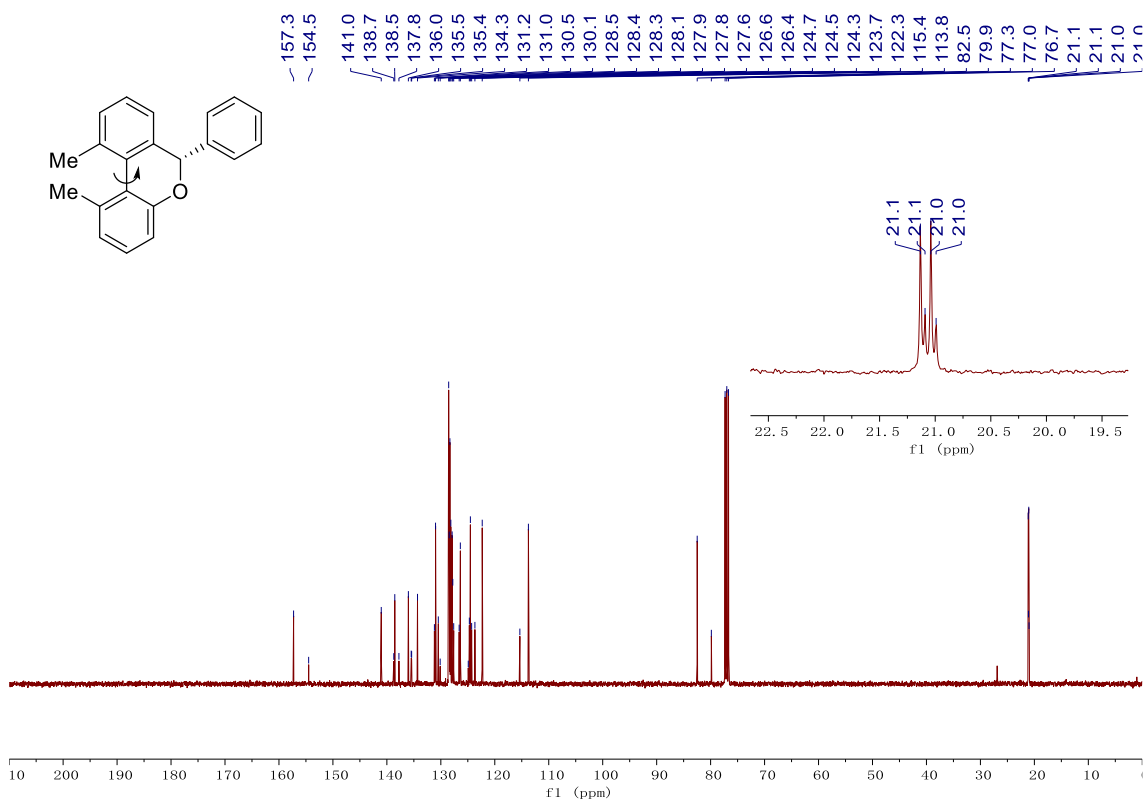

<sup>1</sup>H NMR (400 MHz, CDCl<sub>3</sub>) of **4a**

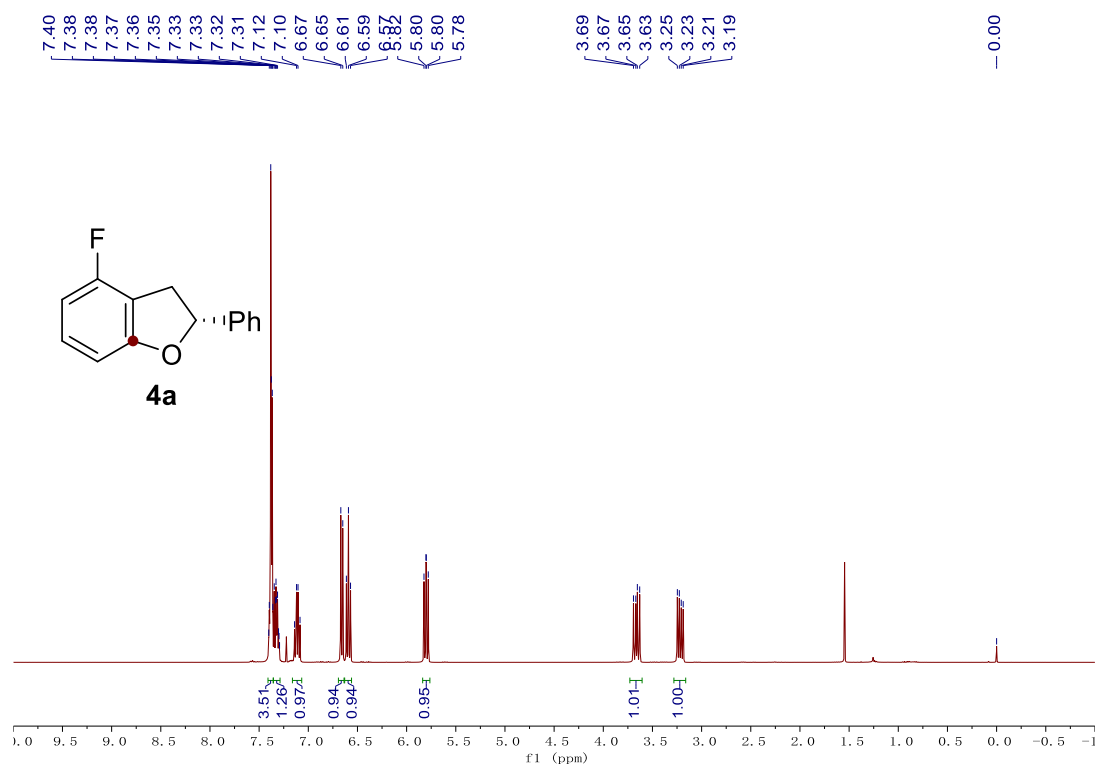

<sup>13</sup>C NMR (100 MHz, CDCl<sub>3</sub>) of **4a**

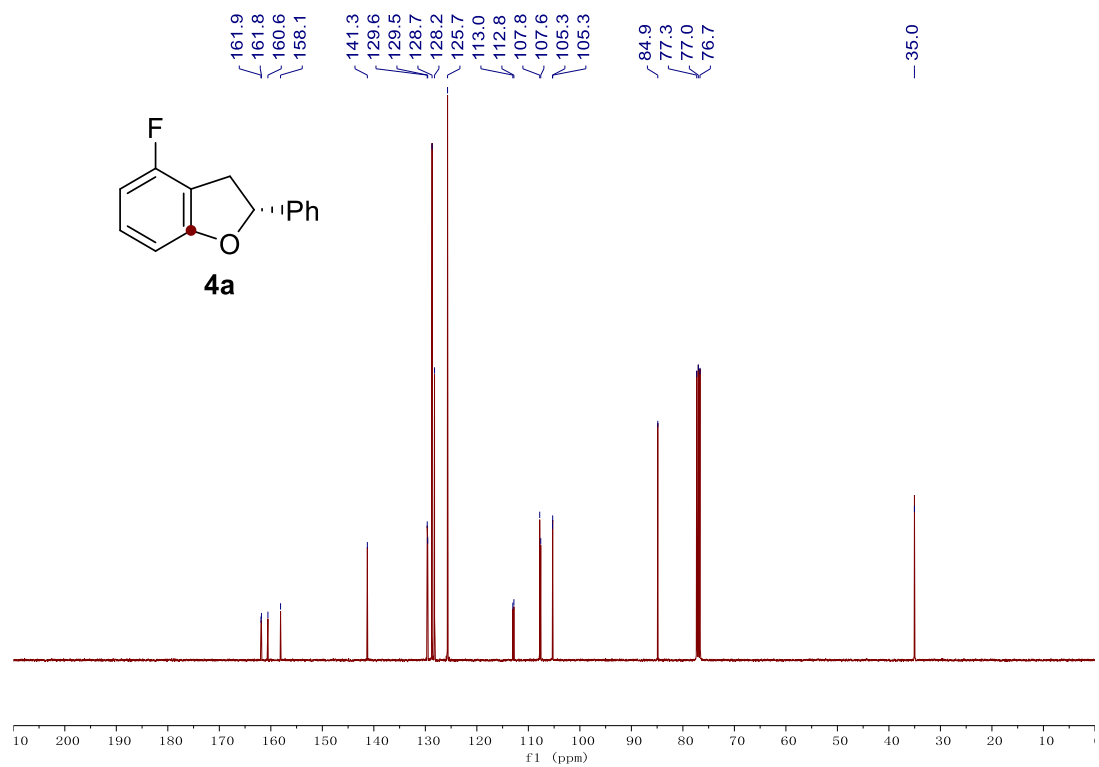

$^{19}\text{F}$  NMR (376 MHz,  $\text{CDCl}_3$ ) spectra of **4a**

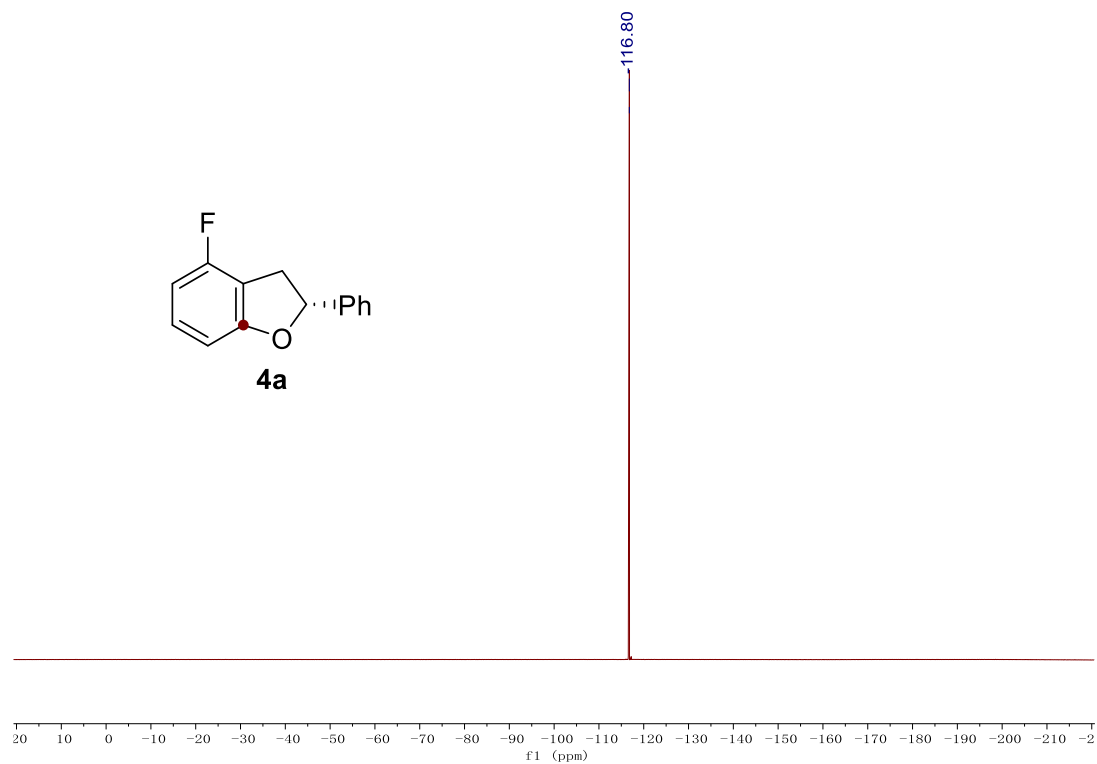

$^1\text{H}$  NMR (400 MHz,  $\text{CDCl}_3$ ) of **4b**

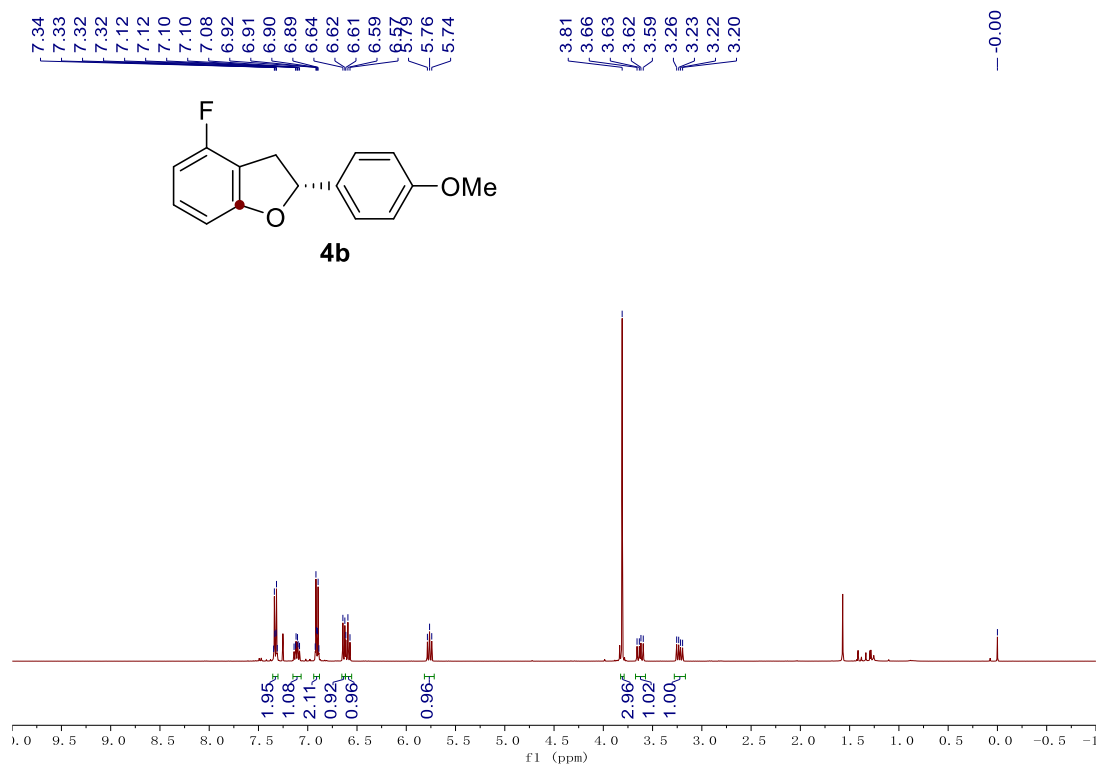

$^{13}\text{C}$  NMR (100 MHz,  $\text{CDCl}_3$ ) of **4b**

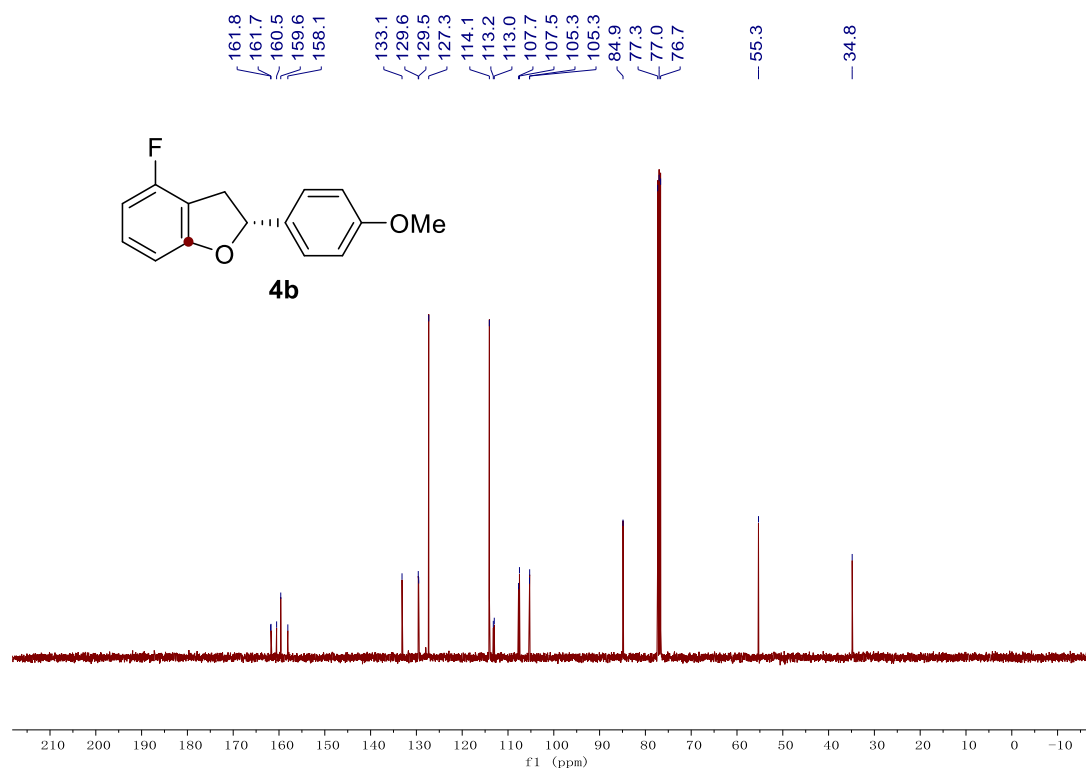

$^{19}\text{F}$  NMR (376 MHz,  $\text{CDCl}_3$ ) spectra of product **4b**

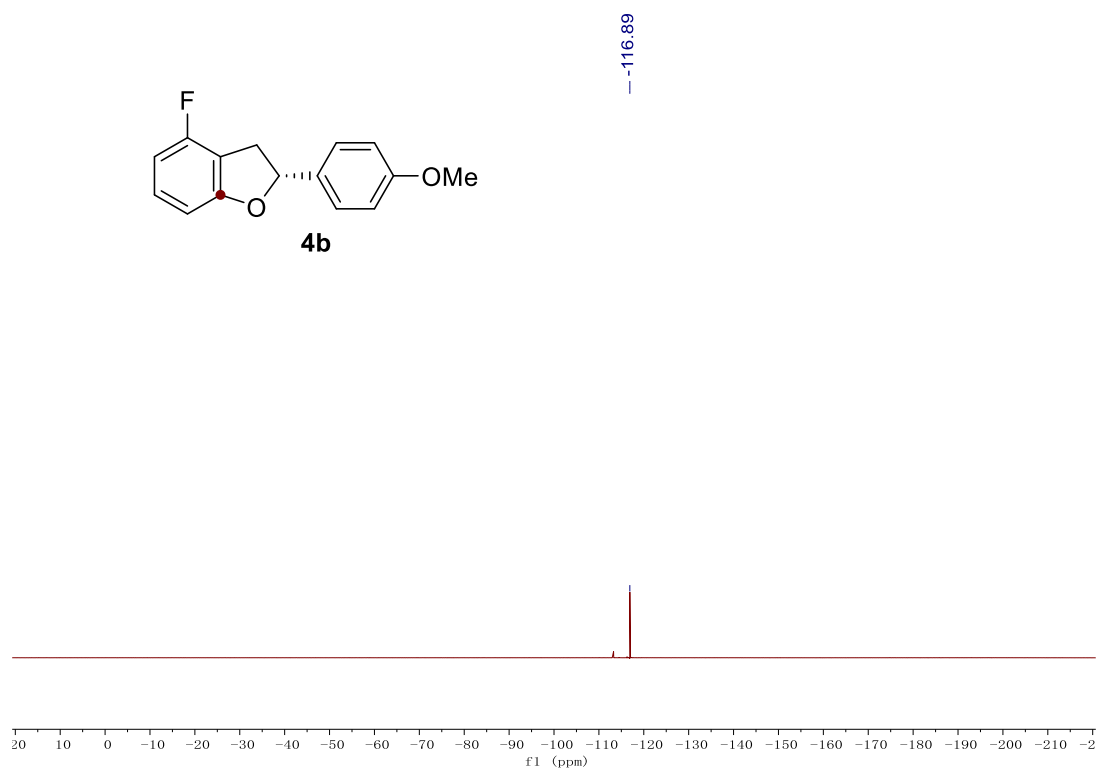

<sup>1</sup>H NMR (400 MHz, CDCl<sub>3</sub>) of **4c**

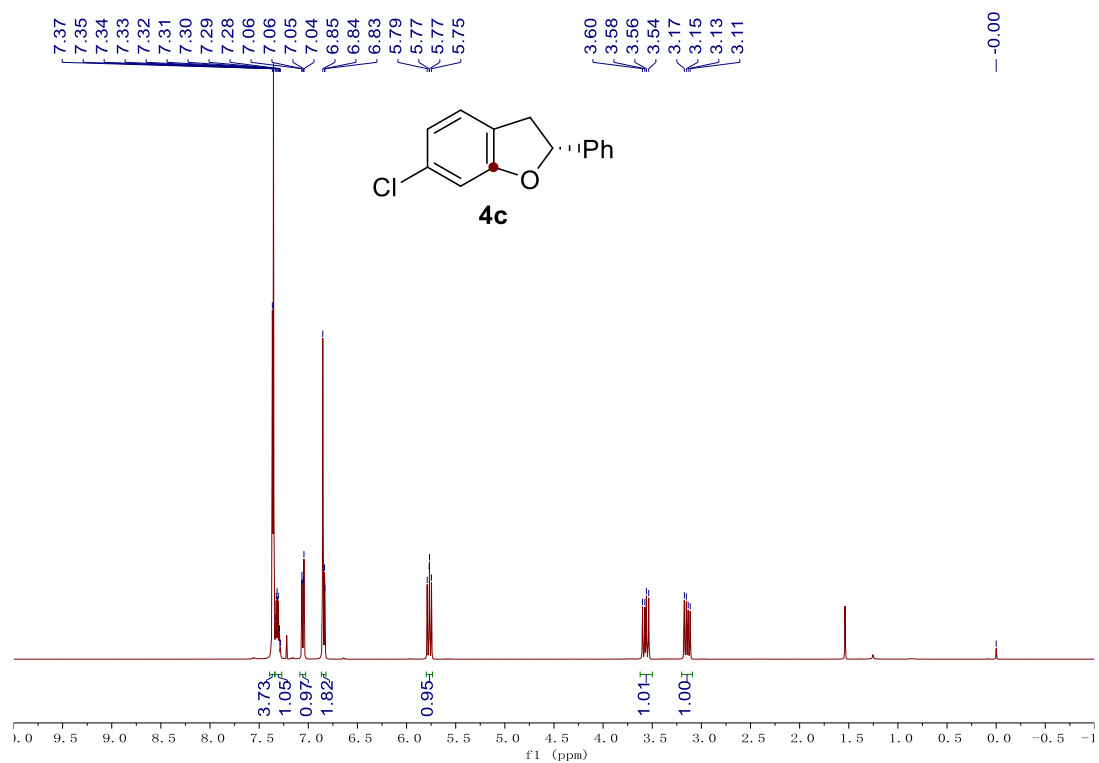

<sup>13</sup>C NMR (100 MHz, CDCl<sub>3</sub>) spectra of **4c**

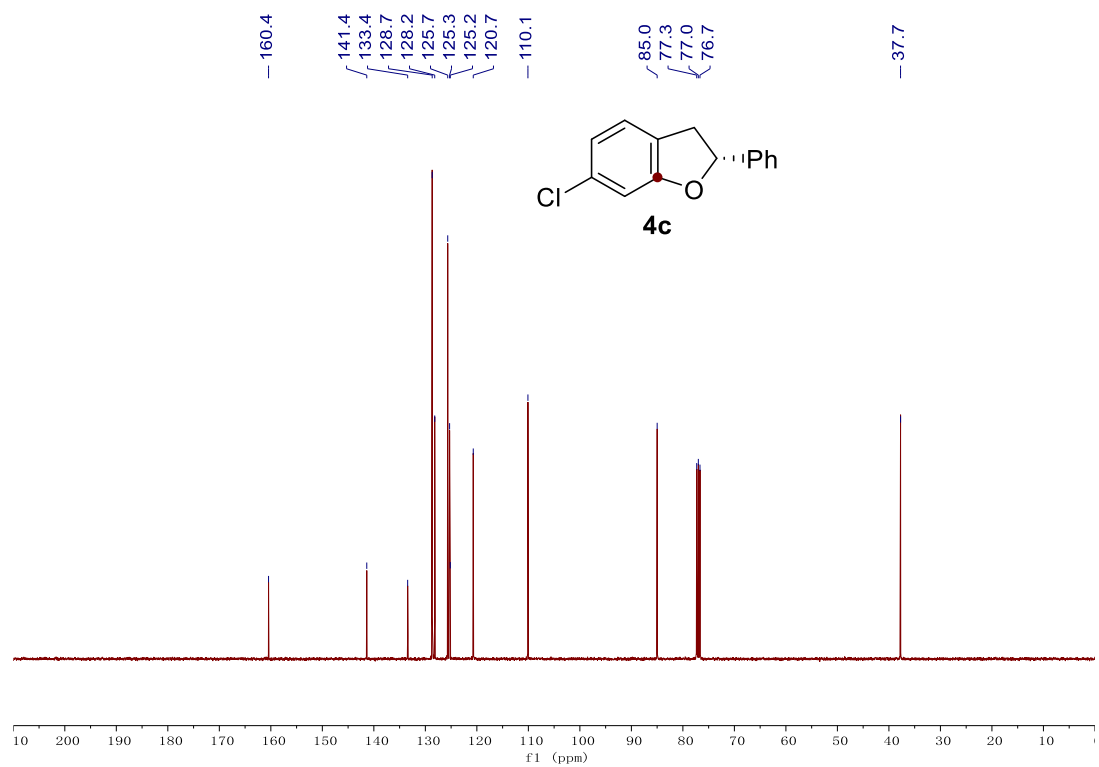

$^1\text{H}$  NMR (400 MHz,  $\text{CDCl}_3$ ) of **4d**

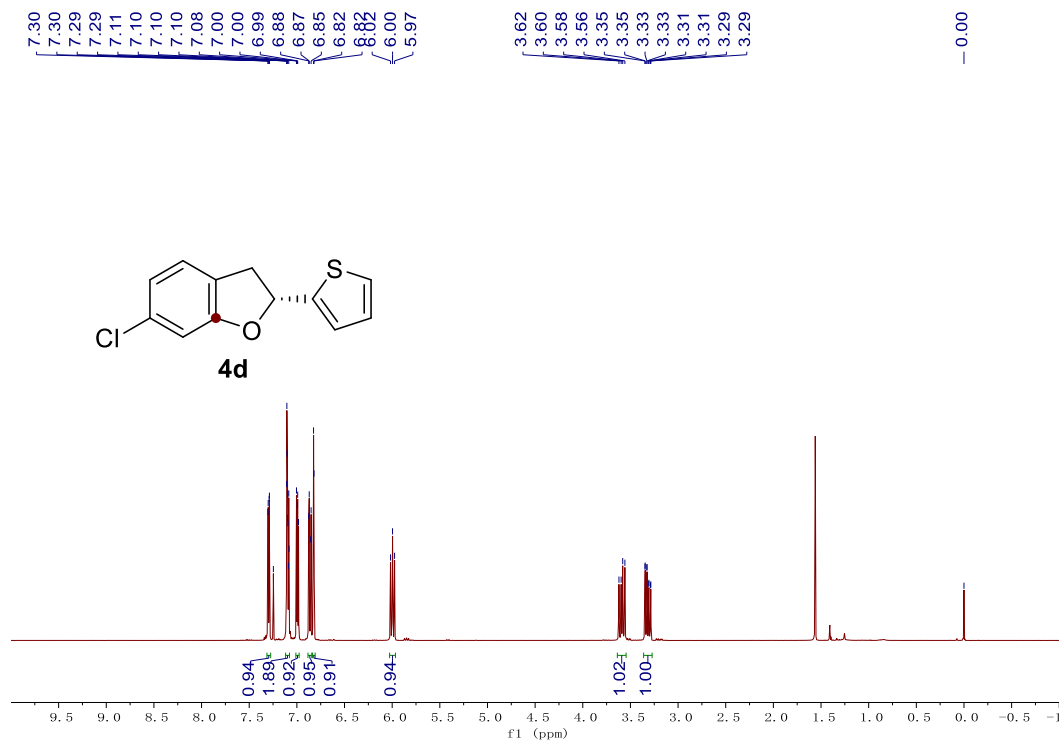

$^{13}\text{C}$  NMR (100 MHz,  $\text{CDCl}_3$ ) spectra of **4d**

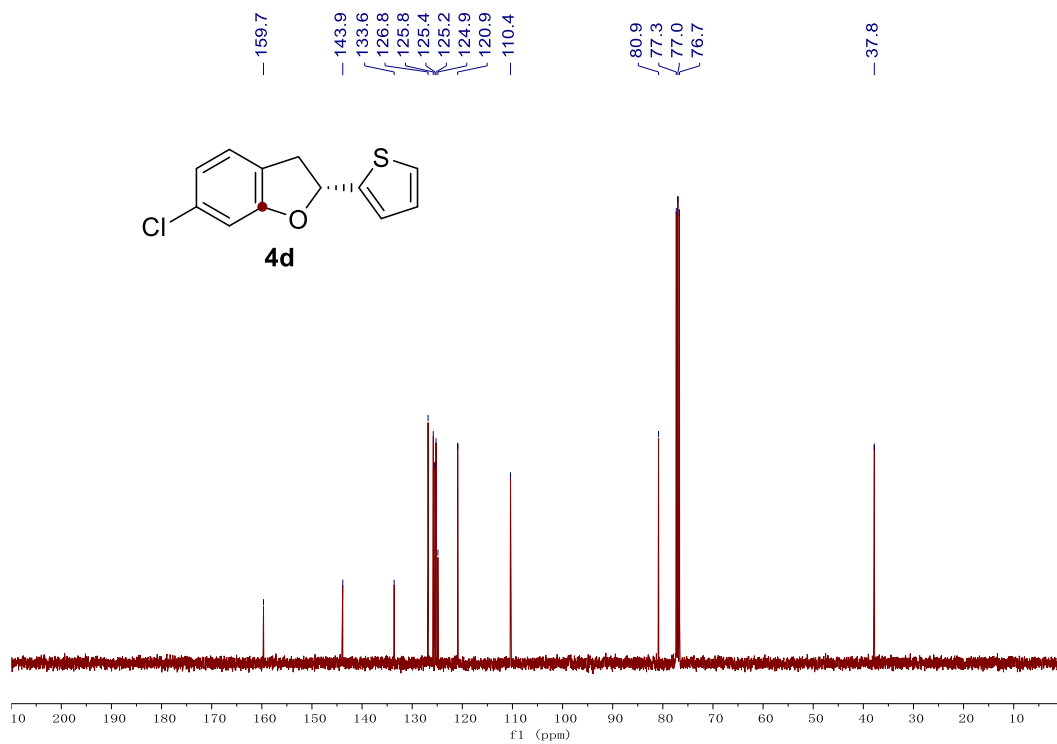



<sup>1</sup>H NMR (400 MHz, CDCl<sub>3</sub>) of **4e**

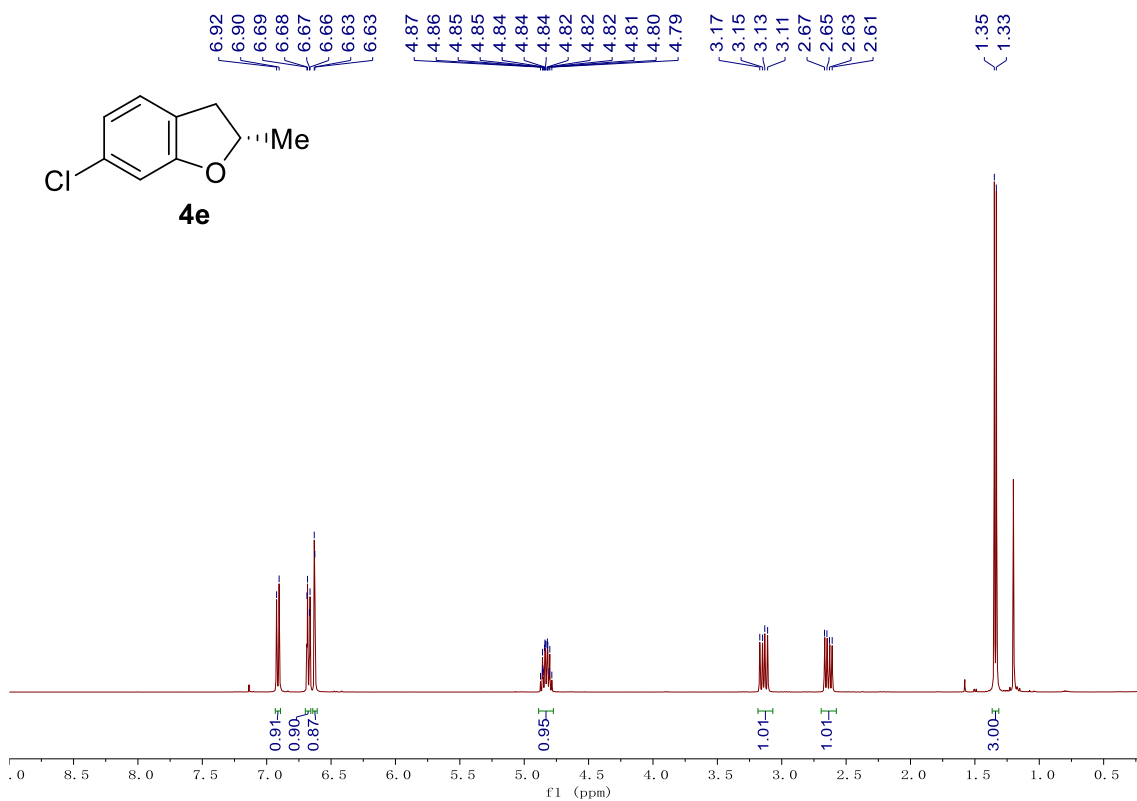

<sup>13</sup>C NMR (100 MHz, CDCl<sub>3</sub>) spectra of **4e**

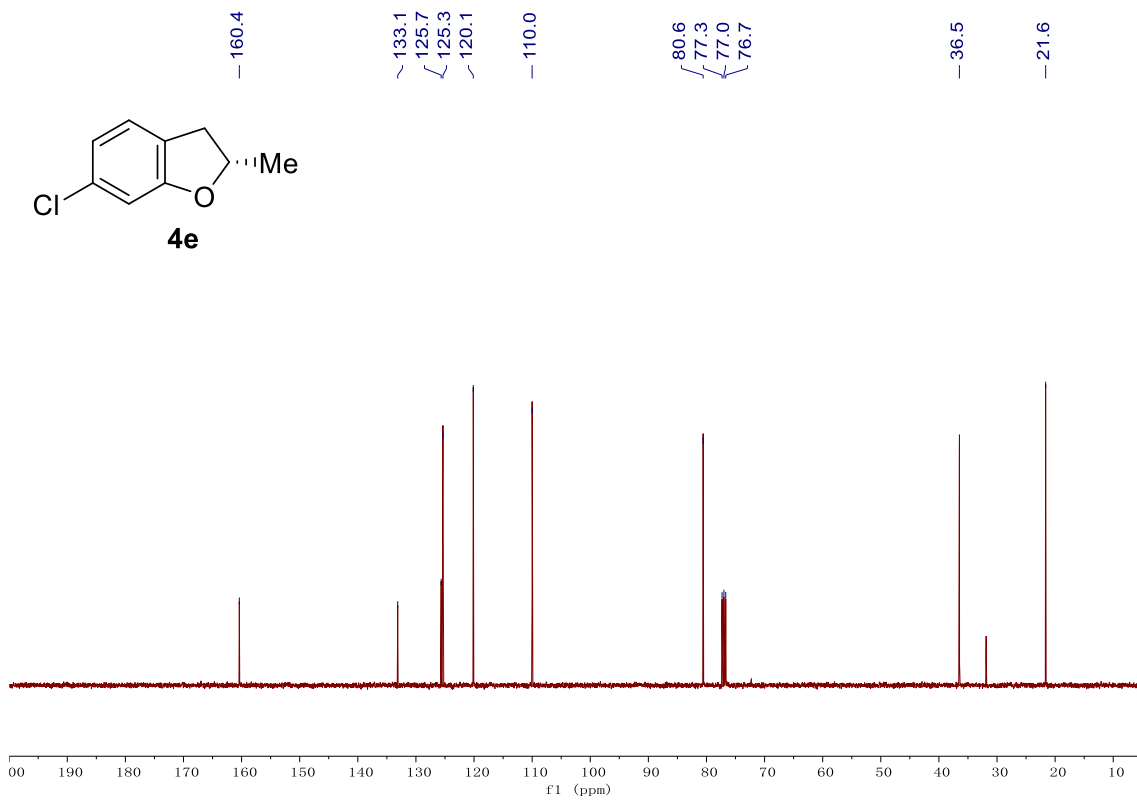

<sup>1</sup>H NMR (400 MHz, CDCl<sub>3</sub>) of **5a**

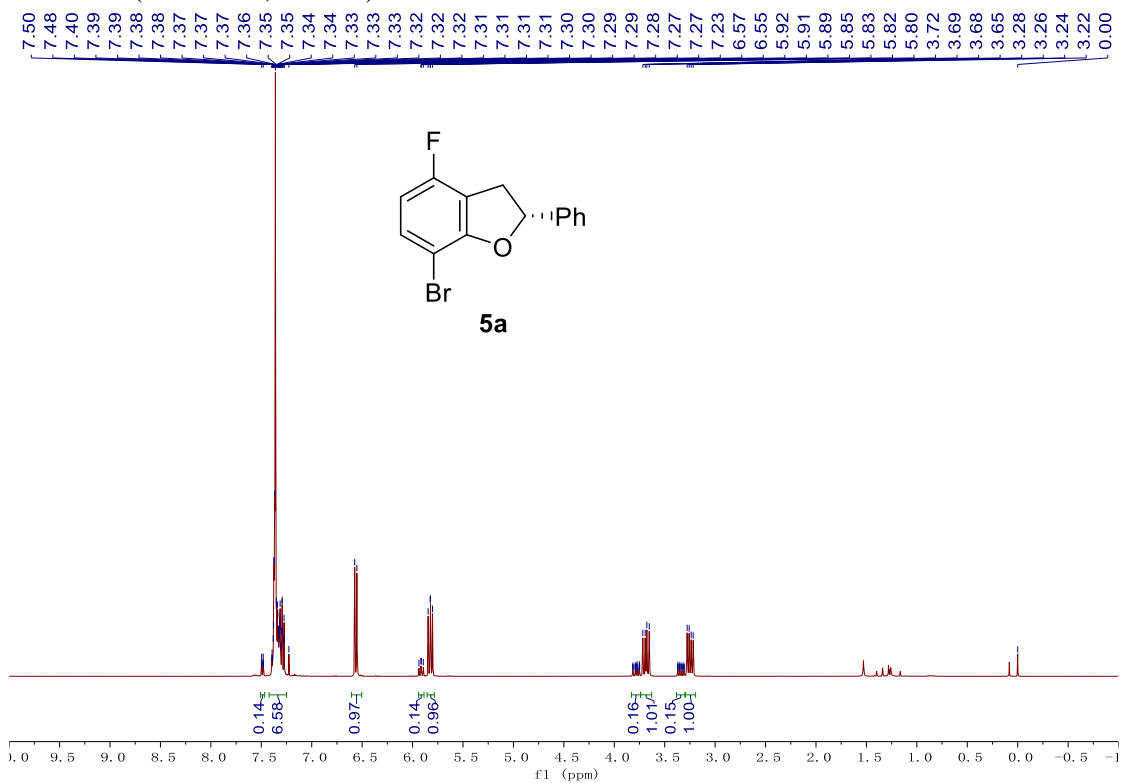

<sup>13</sup>C NMR (400 MHz, CDCl<sub>3</sub>) of **5a**

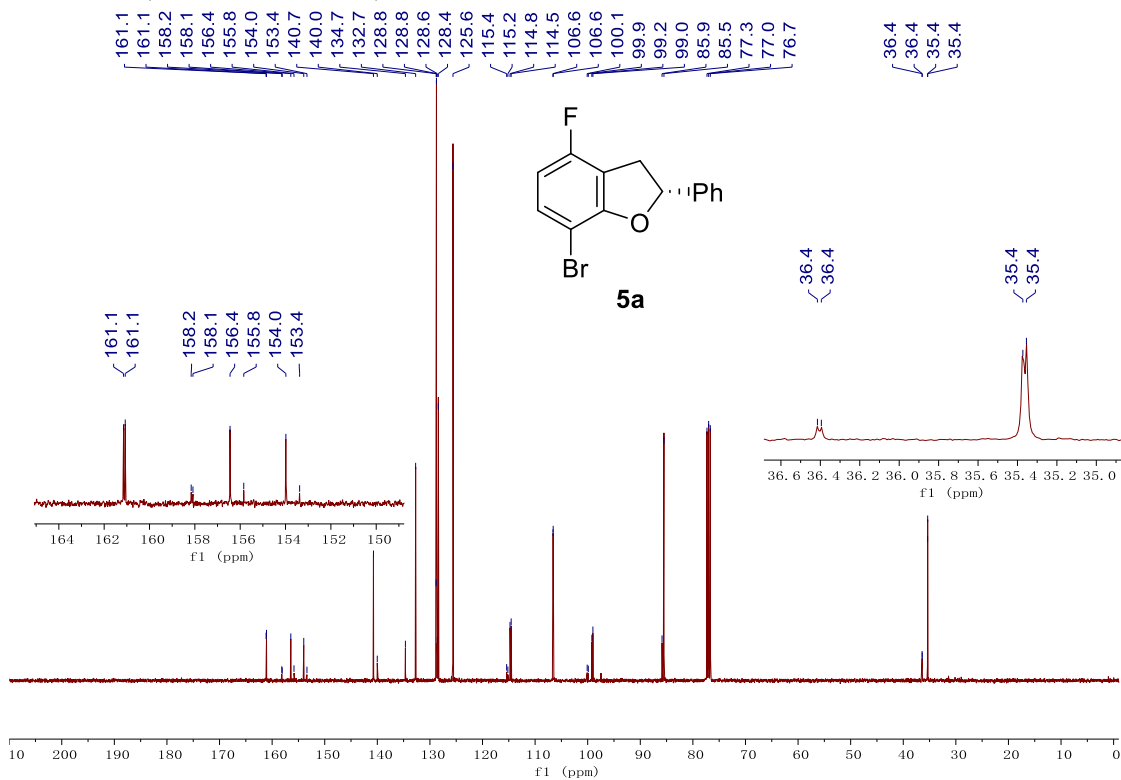

$^{19}\text{F}$  NMR (400 MHz,  $\text{CDCl}_3$ ) of **5a**

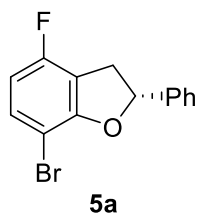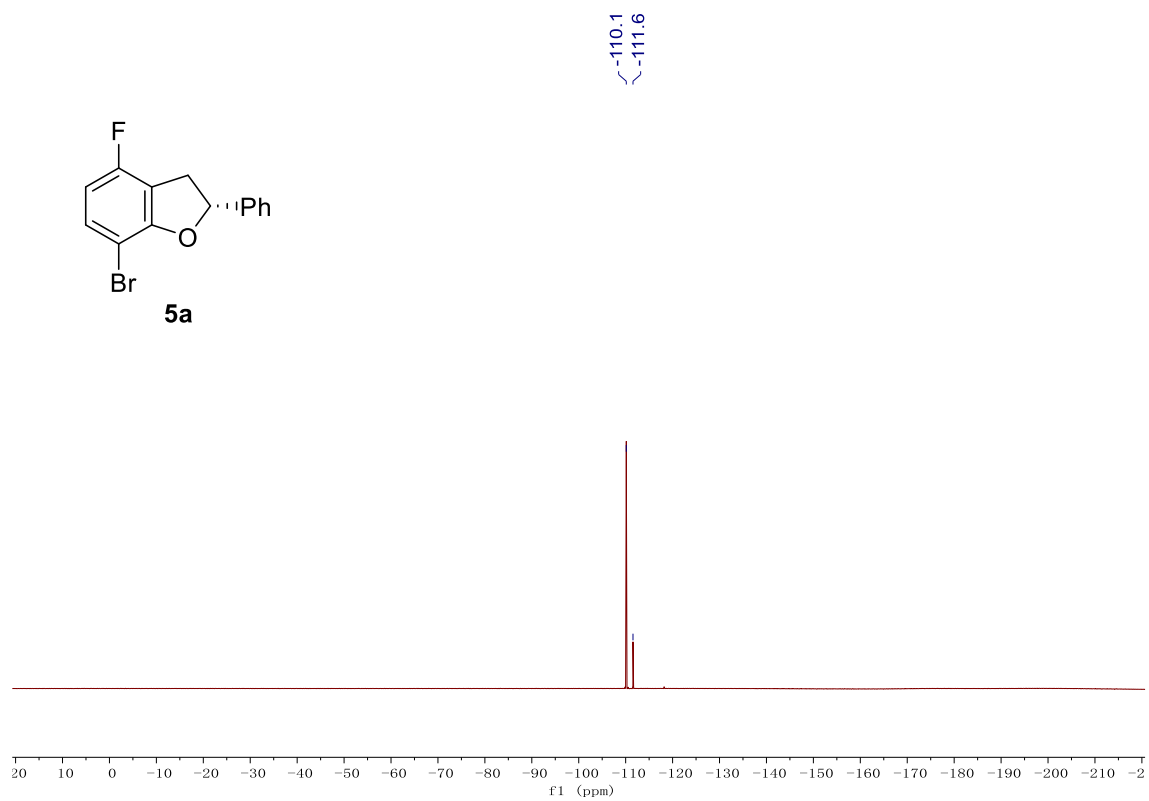

## 6. HPLC Spectra of the Products

HPLC spectra of **2a**

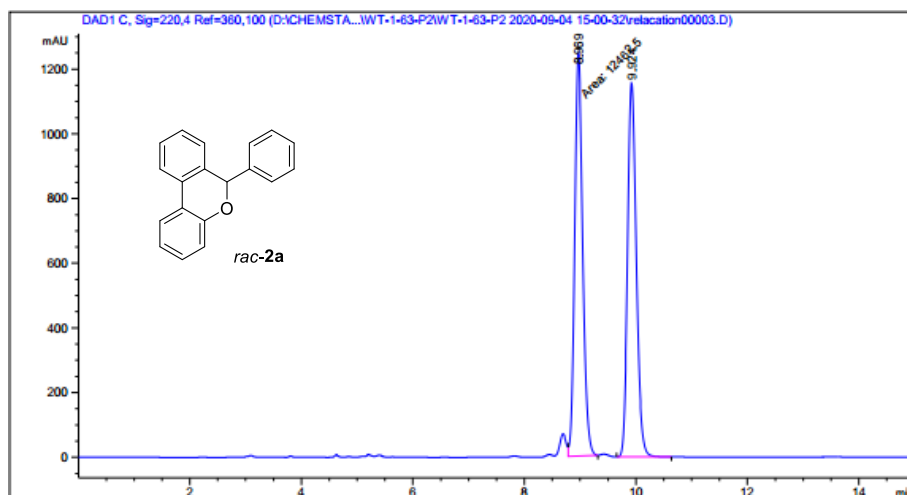

Signal 1: DAD1 C, Sig=220,4 Ref=360,100

| Peak # | RetTime [min] | Type | Width [min] | Area [mAU*s] | Height [mAU] | Area %  |
|--------|---------------|------|-------------|--------------|--------------|---------|
| 1      | 8.969         | FM   | 0.1669      | 1.24625e4    | 1244.70911   | 49.9398 |
| 2      | 9.924         | BB   | 0.1660      | 1.24926e4    | 1156.89917   | 50.0602 |

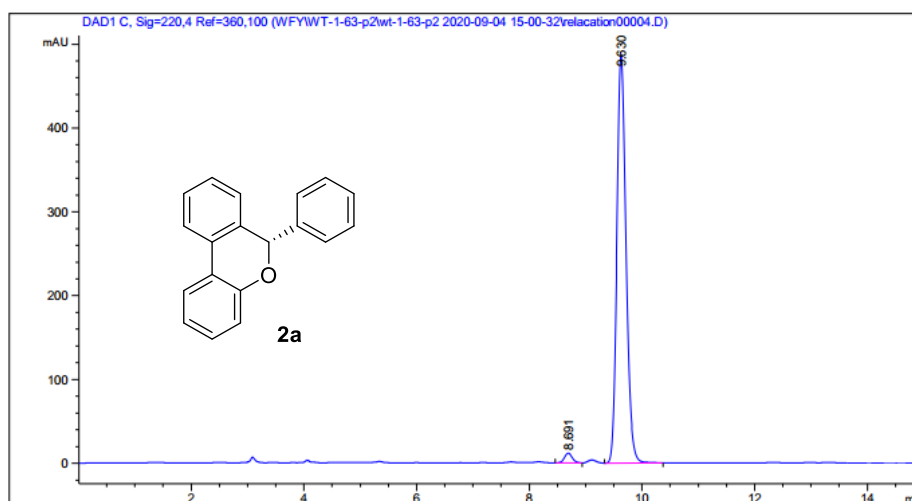

Signal 1: DAD1 C, Sig=220,4 Ref=360,100

| Peak # | RetTime [min] | Type | Width [min] | Area [mAU*s] | Height [mAU] | Area %  |
|--------|---------------|------|-------------|--------------|--------------|---------|
| 1      | 8.691         | BV   | 0.1495      | 114.63356    | 11.78438     | 2.0500  |
| 2      | 9.630         | BB   | 0.1735      | 5477.12744   | 486.02441    | 97.9500 |

## HPLC spectra of 2b

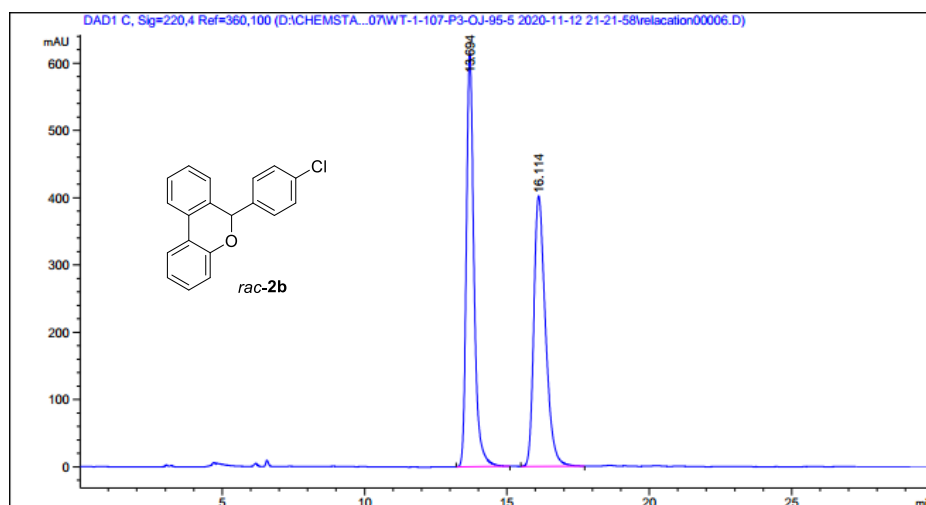

Signal 1: DAD1 C, Sig=220,4 Ref=360,100

| Peak # | RetTime [min] | Type | Width [min] | Area [mAU*s] | Height [mAU] | Area %  |
|--------|---------------|------|-------------|--------------|--------------|---------|
| 1      | 13.694        | BB   | 0.2837      | 1.14168e4    | 611.70081    | 50.0571 |
| 2      | 16.114        | BB   | 0.4347      | 1.13907e4    | 401.86435    | 49.9429 |

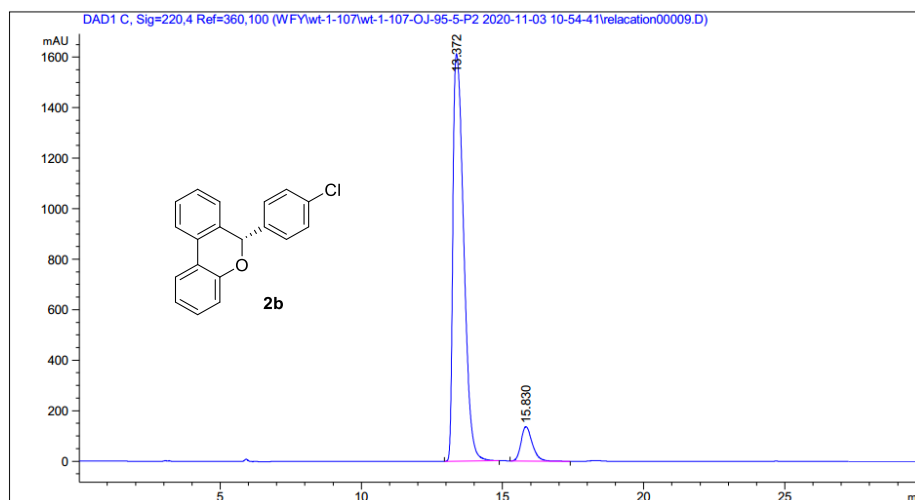

Signal 1: DAD1 C, Sig=220,4 Ref=360,100

| Peak # | RetTime [min] | Type | Width [min] | Area [mAU*s] | Height [mAU] | Area %  |
|--------|---------------|------|-------------|--------------|--------------|---------|
| 1      | 13.372        | BB   | 0.4235      | 4.27678e4    | 1612.35168   | 91.9195 |
| 2      | 15.830        | BB   | 0.4220      | 3759.62305   | 136.21463    | 8.0805  |

## HPLC spectra of 2c

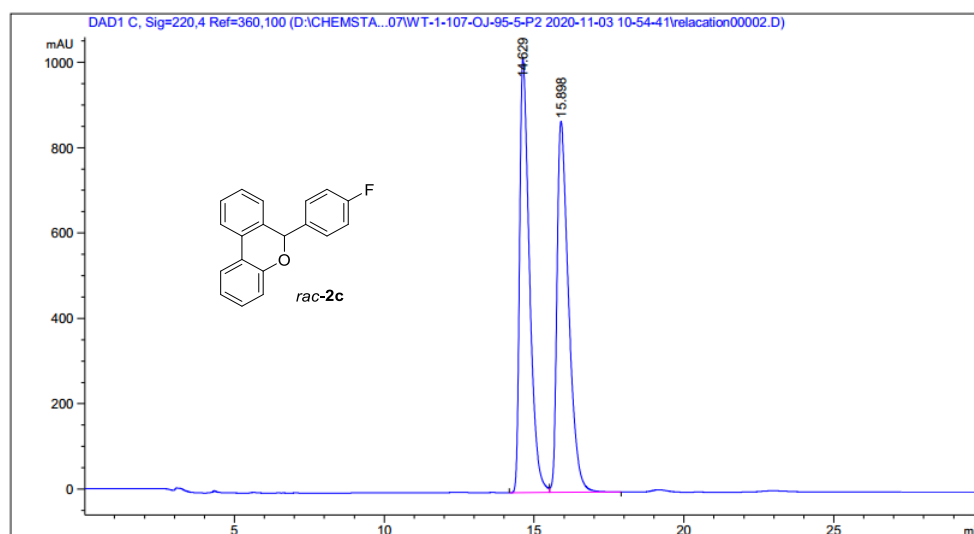

Signal 1: DAD1 C, Sig=220,4 Ref=360,100

| Peak # | RetTime [min] | Type | Width [min] | Area [mAU*s] | Height [mAU] | Area %  |
|--------|---------------|------|-------------|--------------|--------------|---------|
| 1      | 14.629        | BV   | 0.3447      | 2.32466e4    | 1016.93384   | 49.8552 |
| 2      | 15.898        | VB   | 0.4057      | 2.33816e4    | 869.68231    | 50.1448 |

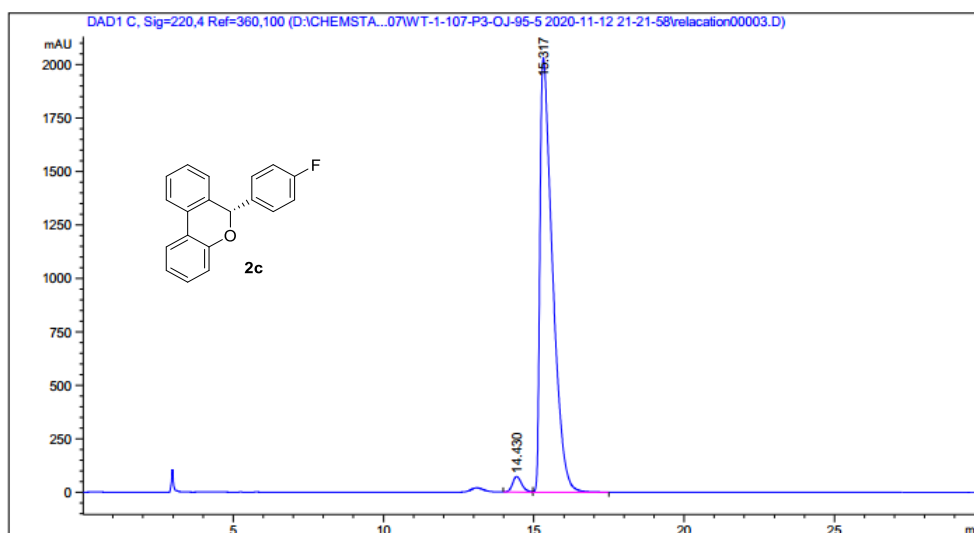

Signal 1: DAD1 C, Sig=220,4 Ref=360,100

| Peak # | RetTime [min] | Type | Width [min] | Area [mAU*s] | Height [mAU] | Area %  |
|--------|---------------|------|-------------|--------------|--------------|---------|
| 1      | 14.430        | BV   | 0.3263      | 1543.90784   | 72.53063     | 2.5681  |
| 2      | 15.317        | VB   | 0.4345      | 5.85745e4    | 2030.53772   | 97.4319 |

## HPLC spectra of 2d

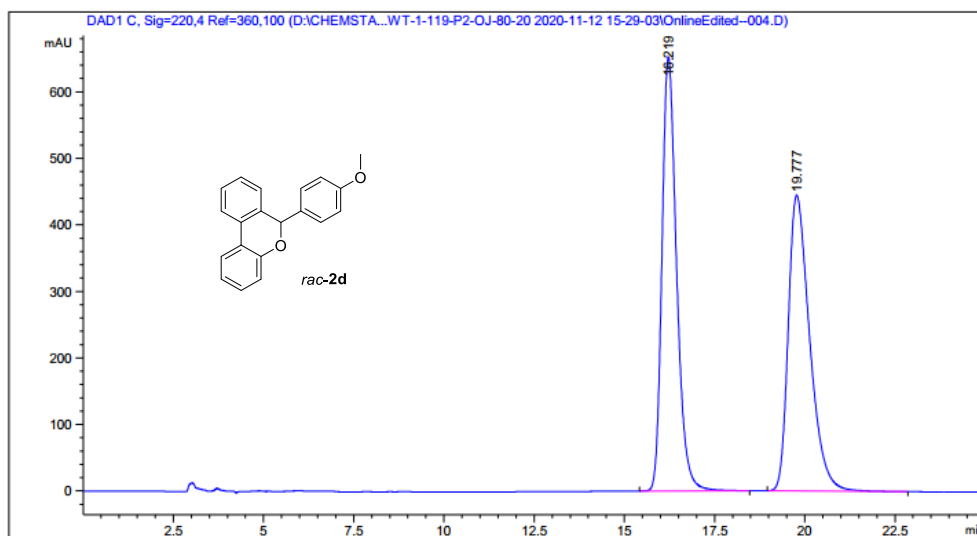

Signal 1: DAD1 C, Sig=220,4 Ref=360,100

| Peak # | RetTime [min] | Type | Width [min] | Area [mAU*s] | Height [mAU] | Area %  |
|--------|---------------|------|-------------|--------------|--------------|---------|
| 1      | 16.219        | BB   | 0.4301      | 1.83458e4    | 652.30231    | 50.0650 |
| 2      | 19.777        | BB   | 0.6302      | 1.82982e4    | 444.58417    | 49.9350 |

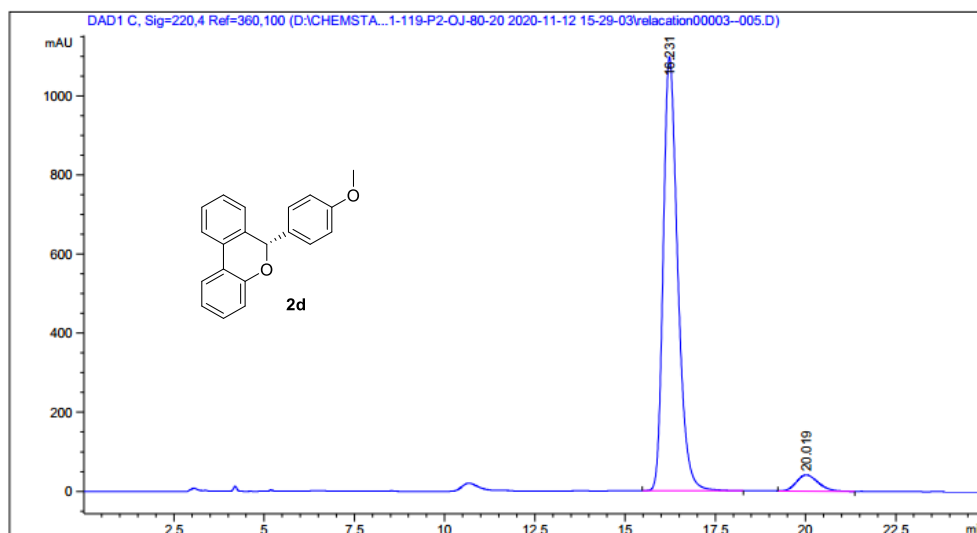

Signal 1: DAD1 C, Sig=220,4 Ref=360,100

| Peak # | RetTime [min] | Type | Width [min] | Area [mAU*s] | Height [mAU] | Area %  |
|--------|---------------|------|-------------|--------------|--------------|---------|
| 1      | 16.231        | BB   | 0.4266      | 3.05123e4    | 1096.71619   | 94.6973 |
| 2      | 20.019        | BB   | 0.6381      | 1708.56909   | 41.00250     | 5.3027  |

## HPLC spectra of 2e

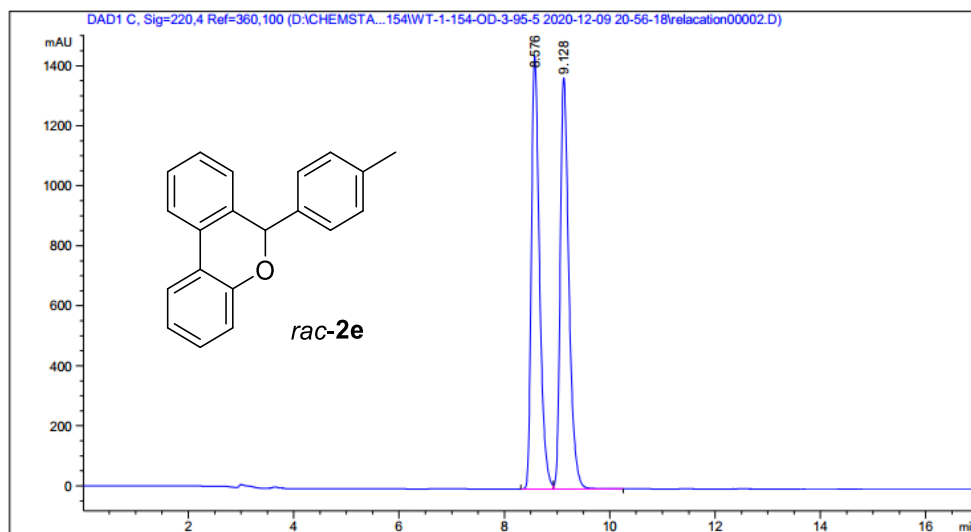

Signal 1: DAD1 C, Sig=220,4 Ref=360,100

| Peak # | RetTime [min] | Type | Width [min] | Area [mAU*s] | Height [mAU] | Area %  |
|--------|---------------|------|-------------|--------------|--------------|---------|
| 1      | 8.576         | BV   | 0.1652      | 1.54951e4    | 1443.85791   | 49.7183 |
| 2      | 9.128         | VB   | 0.1735      | 1.56707e4    | 1369.66626   | 50.2817 |

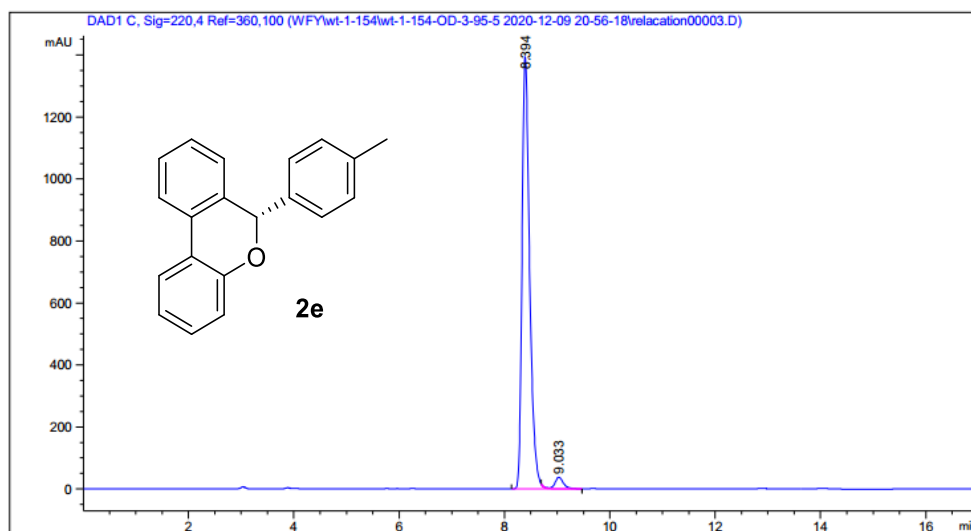

Signal 1: DAD1 C, Sig=220,4 Ref=360,100

| Peak # | RetTime [min] | Type | Width [min] | Area [mAU*s] | Height [mAU] | Area %  |
|--------|---------------|------|-------------|--------------|--------------|---------|
| 1      | 8.394         | BV R | 0.1528      | 1.39576e4    | 1394.38110   | 97.1610 |
| 2      | 9.033         | VB E | 0.1661      | 407.84030    | 37.14923     | 2.8390  |



## HPLC spectra of 2f

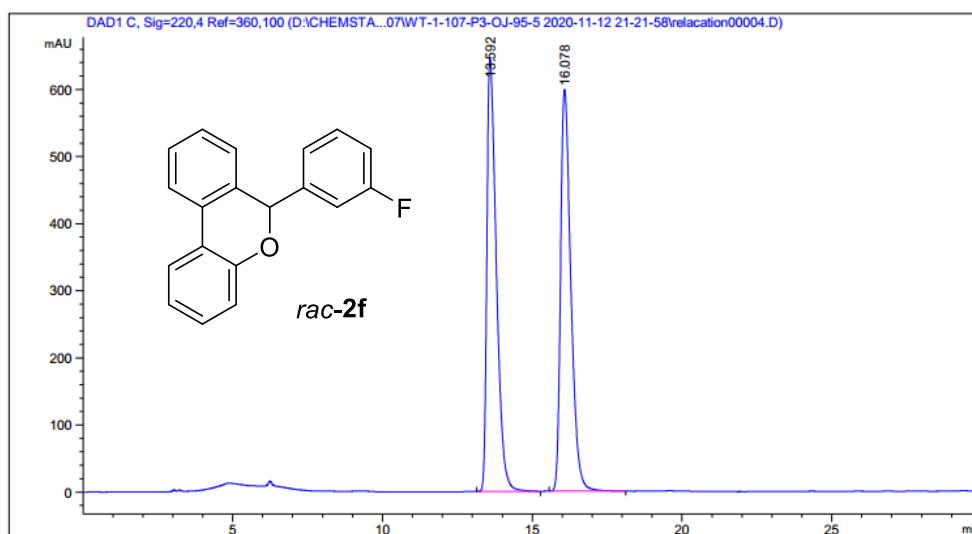

Signal 1: DAD1 C, Sig=220,4 Ref=360,100

| Peak # | RetTime [min] | Type | Width [min] | Area [mAU*s] | Height [mAU] | Area %  |
|--------|---------------|------|-------------|--------------|--------------|---------|
| 1      | 13.592        | BB   | 0.3364      | 1.41806e4    | 645.35284    | 49.8569 |
| 2      | 16.078        | BB   | 0.3638      | 1.42620e4    | 598.89777    | 50.1431 |

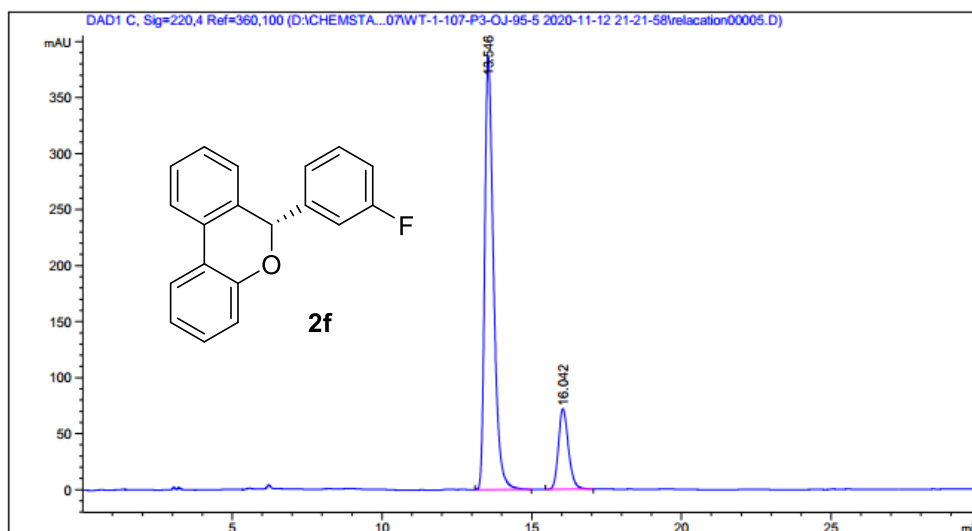

| Peak # | RetTime [min] | Type | Width [min] | Area [mAU*s] | Height [mAU] | Area %  |
|--------|---------------|------|-------------|--------------|--------------|---------|
| 1      | 13.546        | BB   | 0.3155      | 7932.94043   | 386.37384    | 82.5976 |
| 2      | 16.042        | BB   | 0.3581      | 1671.38098   | 71.66966     | 17.4024 |

## HPLC spectra of 2g

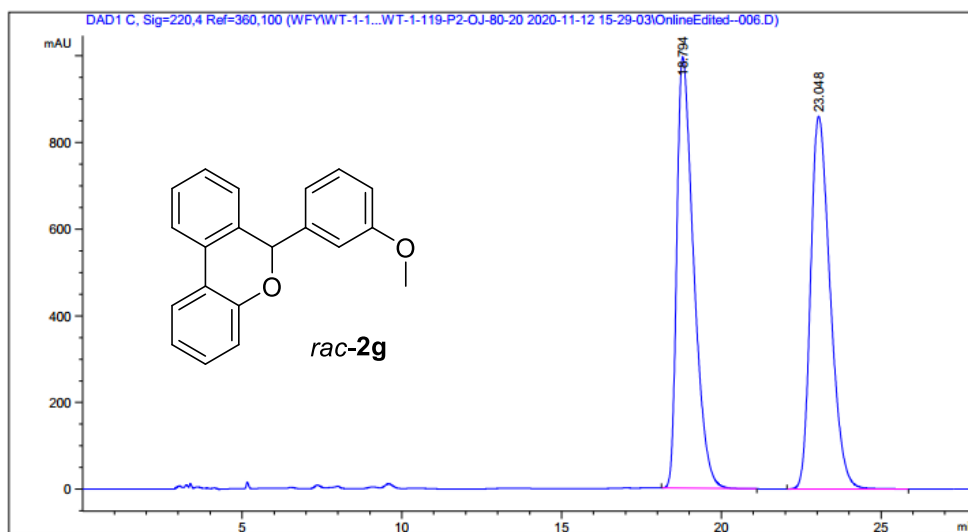

Signal 1: DAD1 C, Sig=220,4 Ref=360,100

| Peak # | RetTime [min] | Type | Width [min] | Area [mAU*s] | Height [mAU] | Area %  |
|--------|---------------|------|-------------|--------------|--------------|---------|
| 1      | 18.794        | BB   | 0.5546      | 3.63708e4    | 994.73920    | 49.8204 |
| 2      | 23.048        | BB   | 0.6547      | 3.66331e4    | 860.51050    | 50.1796 |

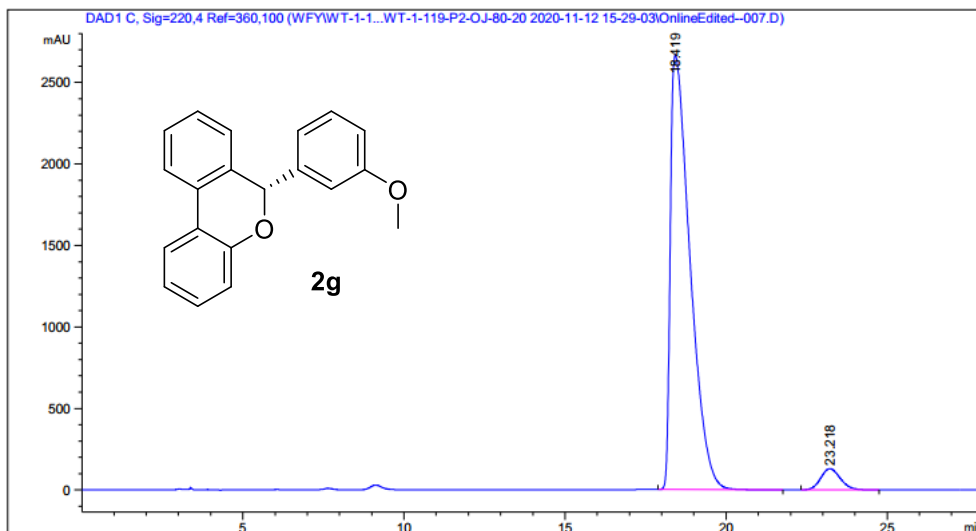

Signal 1: DAD1 C, Sig=220,4 Ref=360,100

| Peak # | RetTime [min] | Type | Width [min] | Area [mAU*s] | Height [mAU] | Area %  |
|--------|---------------|------|-------------|--------------|--------------|---------|
| 1      | 18.419        | BB   | 0.5535      | 1.12854e5    | 2667.82666   | 95.3653 |
| 2      | 23.218        | BB   | 0.6547      | 5484.62158   | 129.86960    | 4.6347  |

## HPLC spectra of 2h

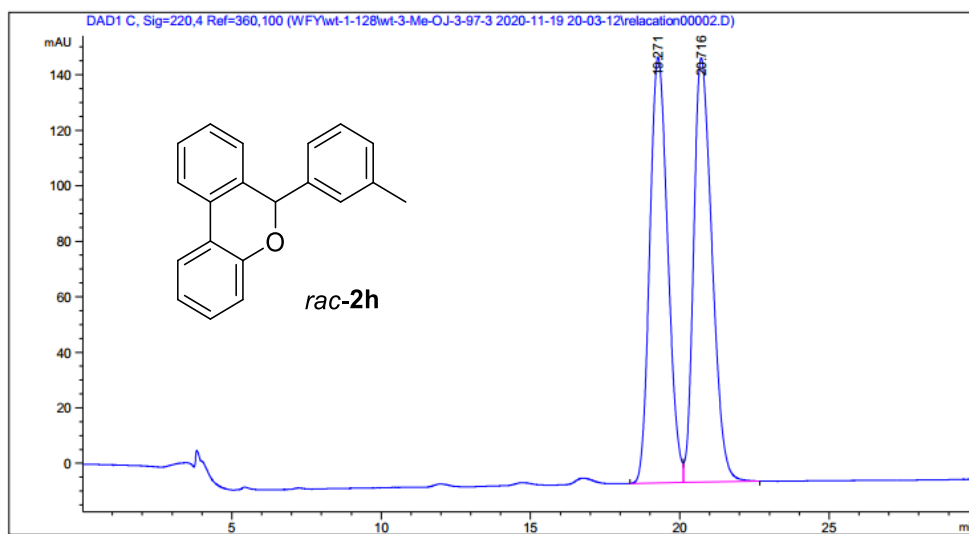

Signal 1: DAD1 C, Sig=220,4 Ref=360,100

| Peak # | RetTime [min] | Type | Width [min] | Area [mAU*s] | Height [mAU] | Area %  |
|--------|---------------|------|-------------|--------------|--------------|---------|
| 1      | 19.271        | BV   | 0.6535      | 6411.57959   | 153.44704    | 49.5396 |
| 2      | 20.716        | VB   | 0.6722      | 6530.75244   | 152.93167    | 50.4604 |

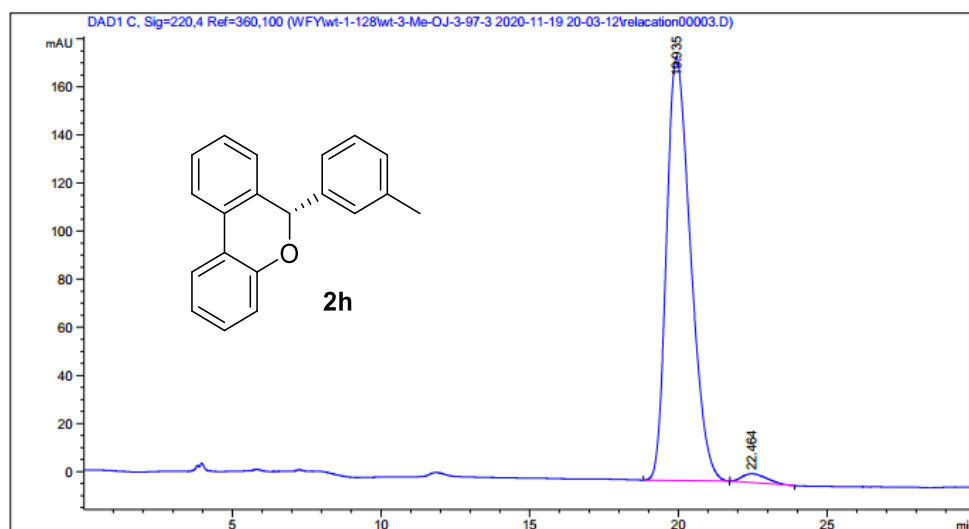

Signal 1: DAD1 C, Sig=220,4 Ref=360,100

| Peak # | RetTime [min] | Type | Width [min] | Area [mAU*s] | Height [mAU] | Area %  |
|--------|---------------|------|-------------|--------------|--------------|---------|
| 1      | 19.935        | BB   | 0.8555      | 9887.25195   | 175.96992    | 97.8407 |
| 2      | 22.464        | BB   | 0.7056      | 218.21060    | 3.72423      | 2.1593  |

HPLC spectra of **2i**

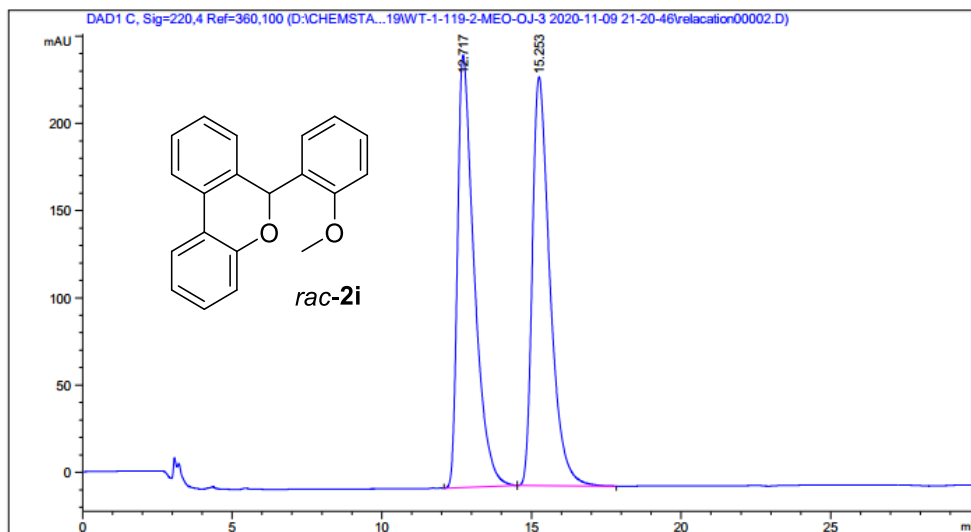

Signal 1: DAD1 C, Sig=220,4 Ref=360,100

| Peak # | RetTime [min] | Type | Width [min] | Area [mAU*s] | Height [mAU] | Area %  |
|--------|---------------|------|-------------|--------------|--------------|---------|
| 1      | 12.717        | BB   | 0.5730      | 9582.91016   | 247.88930    | 49.9819 |
| 2      | 15.253        | BB   | 0.6193      | 9589.83203   | 234.39232    | 50.0181 |

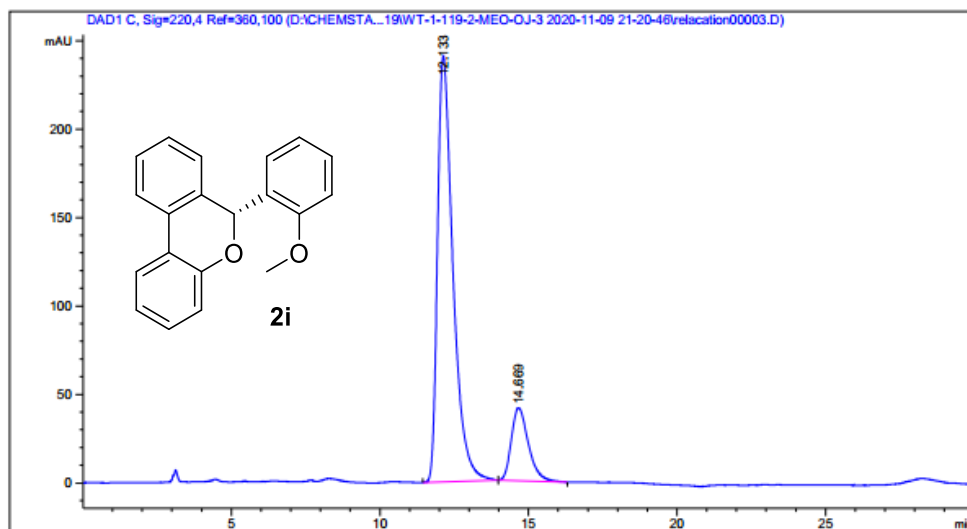

Signal 1: DAD1 C, Sig=220,4 Ref=360,100

| Peak # | RetTime [min] | Type | Width [min] | Area [mAU*s] | Height [mAU] | Area %  |
|--------|---------------|------|-------------|--------------|--------------|---------|
| 1      | 12.133        | BB   | 0.5449      | 8686.54590   | 240.76474    | 84.1266 |
| 2      | 14.669        | BB   | 0.6059      | 1639.01331   | 41.21609     | 15.8734 |

HPLC spectra of **2j**

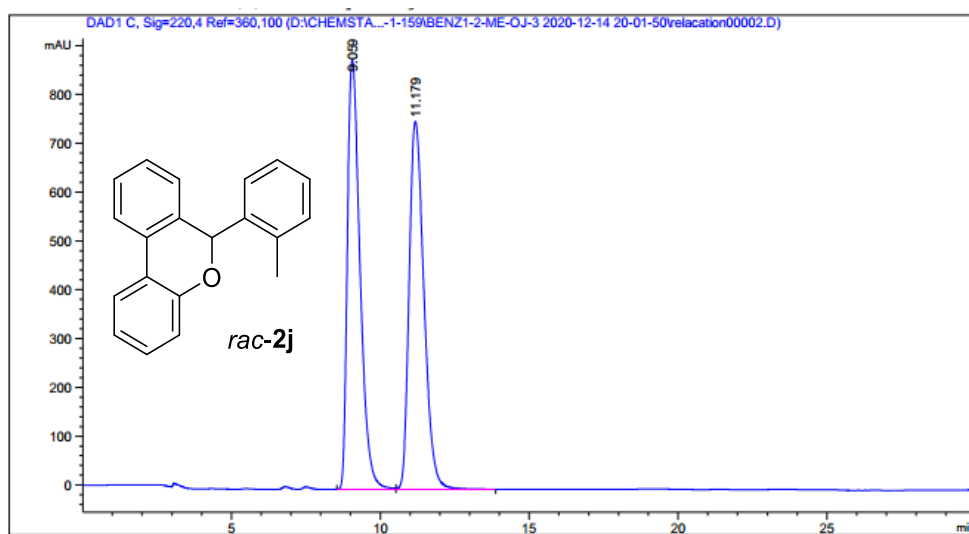

Signal 1: DAD1 C, Sig=220,4 Ref=360,100

| Peak # | RetTime [min] | Type | Width [min] | Area [mAU*s] | Height [mAU] | Area %  |
|--------|---------------|------|-------------|--------------|--------------|---------|
| 1      | 9.059         | BV   | 0.4568      | 2.58529e4    | 879.91907    | 49.8954 |
| 2      | 11.179        | VB   | 0.5379      | 2.59614e4    | 753.54535    | 50.1046 |

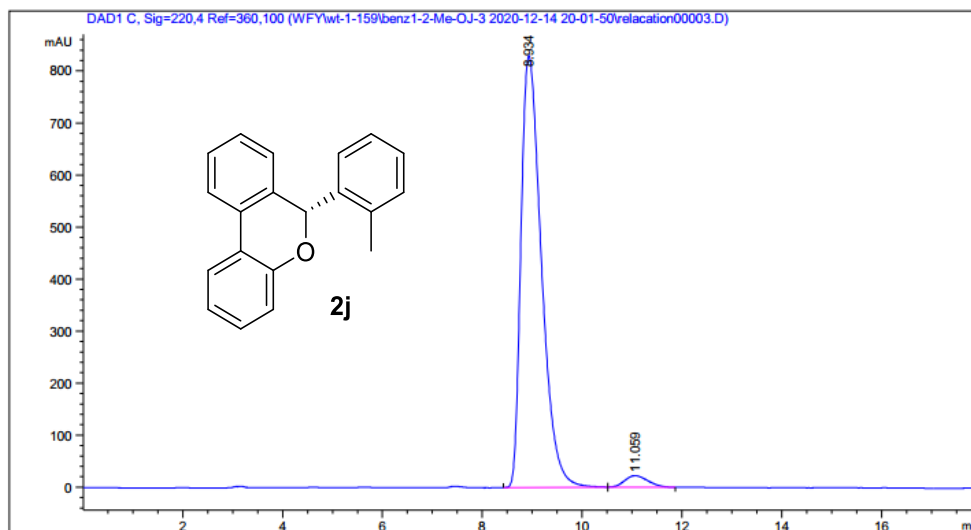

Signal 1: DAD1 C, Sig=220,4 Ref=360,100

| Peak # | RetTime [min] | Type | Width [min] | Area [mAU*s] | Height [mAU] | Area %  |
|--------|---------------|------|-------------|--------------|--------------|---------|
| 1      | 8.934         | BB   | 0.4409      | 2.35340e4    | 829.82886    | 97.0631 |
| 2      | 11.059        | BB   | 0.4939      | 712.07263    | 21.98534     | 2.9369  |

## HPLC spectra of 2l

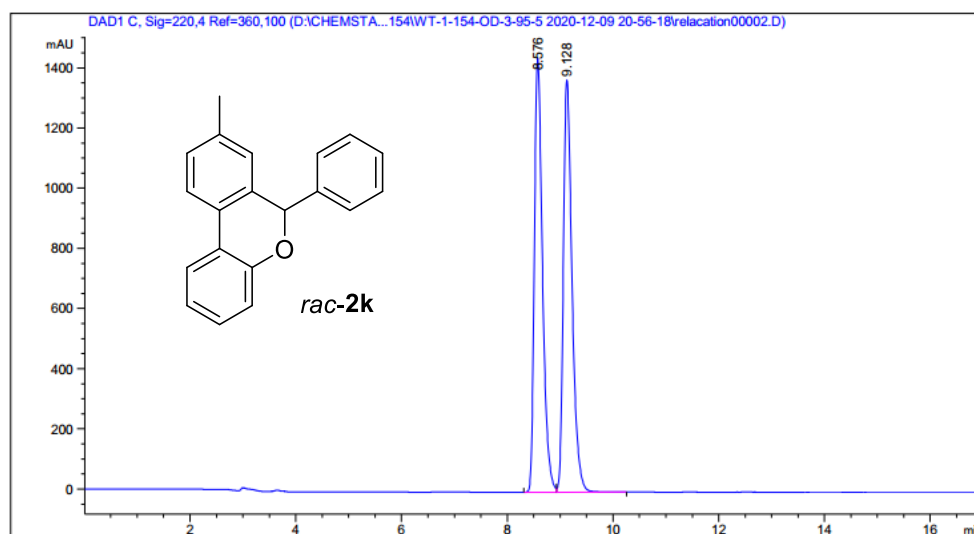

Signal 1: DAD1 C, Sig=220,4 Ref=360,100

| Peak # | RetTime [min] | Type | Width [min] | Area [mAU*s] | Height [mAU] | Area %  |
|--------|---------------|------|-------------|--------------|--------------|---------|
| 1      | 8.576         | BV   | 0.1652      | 1.54951e4    | 1443.85791   | 49.7183 |
| 2      | 9.128         | VB   | 0.1735      | 1.56707e4    | 1369.66626   | 50.2817 |

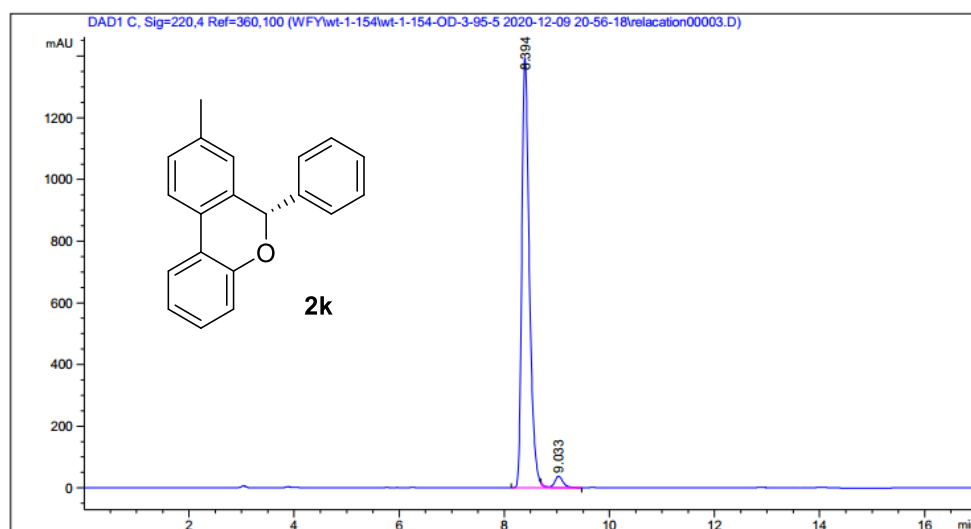

Signal 1: DAD1 C, Sig=220,4 Ref=360,100

| Peak # | RetTime [min] | Type | Width [min] | Area [mAU*s] | Height [mAU] | Area %  |
|--------|---------------|------|-------------|--------------|--------------|---------|
| 1      | 8.394         | BV R | 0.1528      | 1.39576e4    | 1394.38110   | 97.1610 |
| 2      | 9.033         | VB E | 0.1661      | 407.84030    | 37.14923     | 2.8390  |

## HPLC spectra of 2I

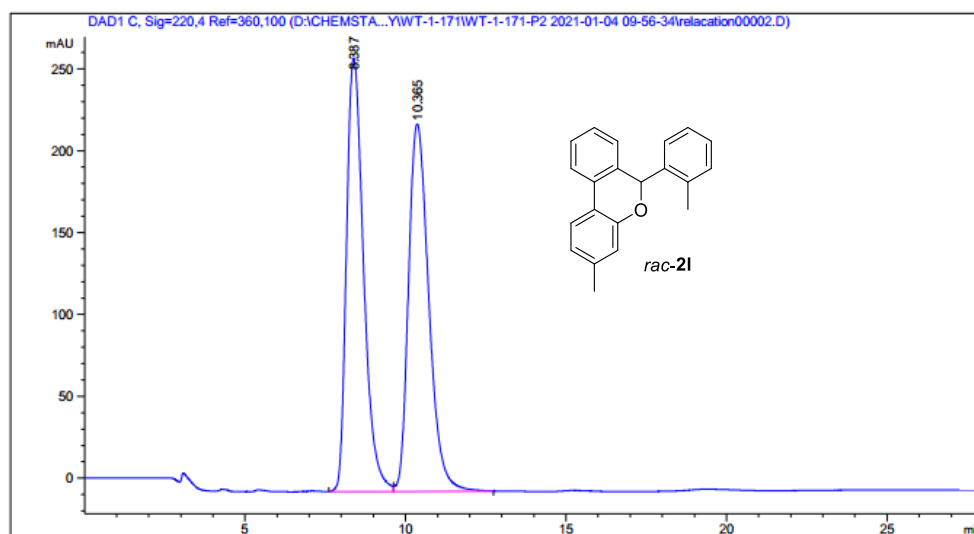

Signal 1: DAD1 C, Sig=220,4 Ref=360,100

| Peak # | RetTime [min] | Type | Width [min] | Area [mAU*s] | Height [mAU] | Area %  |
|--------|---------------|------|-------------|--------------|--------------|---------|
| 1      | 8.387         | BV   | 0.5737      | 9792.11523   | 264.64941    | 49.8991 |
| 2      | 10.365        | VB   | 0.6733      | 9831.71875   | 224.35379    | 50.1009 |

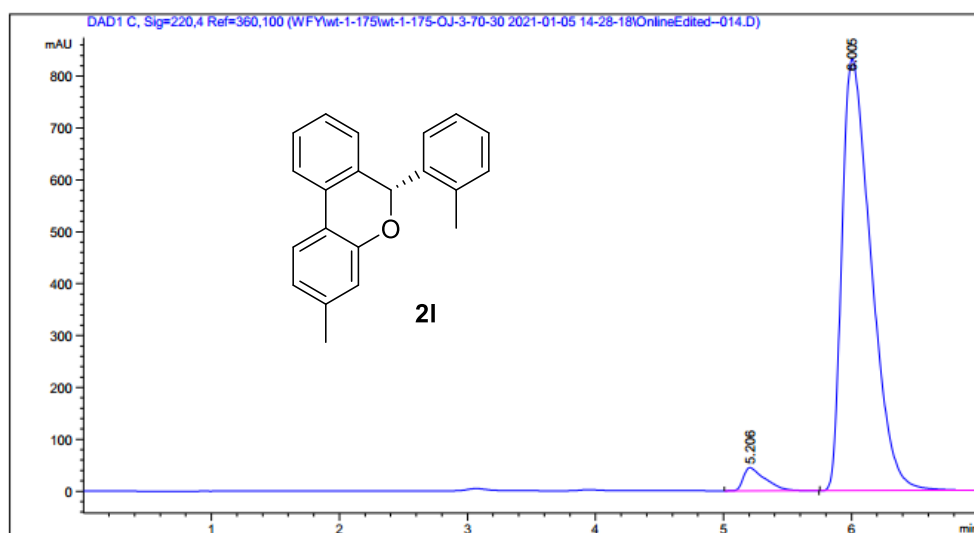

Signal 1: DAD1 C, Sig=220,4 Ref=360,100

| Peak # | RetTime [min] | Type | Width [min] | Area [mAU*s] | Height [mAU] | Area %  |
|--------|---------------|------|-------------|--------------|--------------|---------|
| 1      | 5.206         | BB   | 0.1649      | 525.93671    | 44.81403     | 3.8558  |
| 2      | 6.005         | BBA  | 0.2438      | 1.31142e4    | 832.27734    | 96.1442 |

## HPLC spectra of **2m**

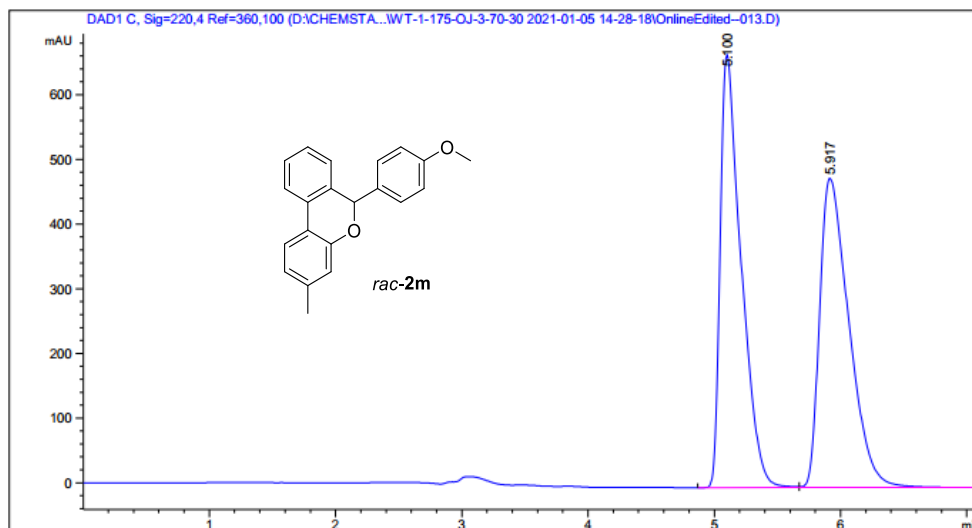

Signal 1: DAD1 C, Sig=220,4 Ref=360,100

| Peak # | RetTime [min] | Type | Width [min] | Area [mAU*s] | Height [mAU] | Area %  |
|--------|---------------|------|-------------|--------------|--------------|---------|
| 1      | 5.100         | BV   | 0.1641      | 7688.05469   | 668.73840    | 49.9850 |
| 2      | 5.917         | VB   | 0.2436      | 7692.67725   | 478.29132    | 50.0150 |

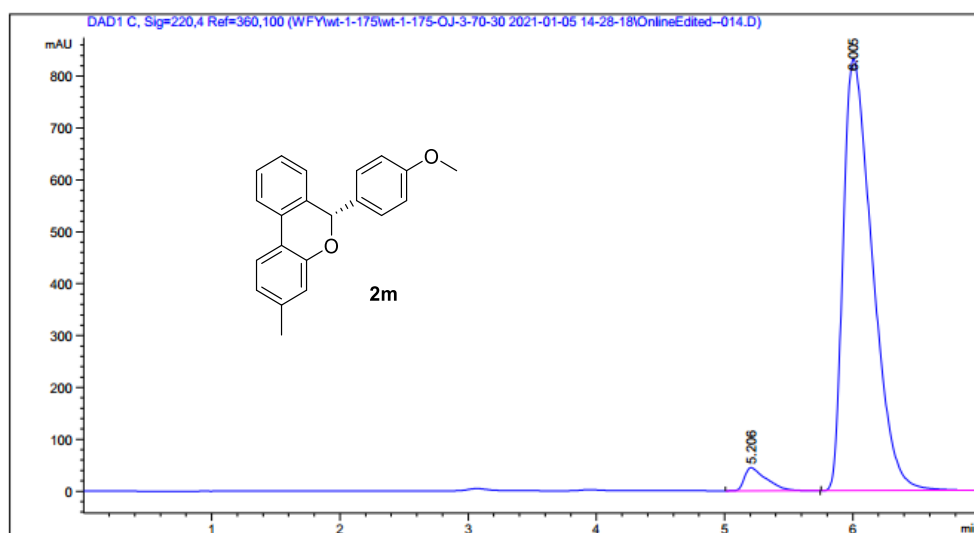

Signal 1: DAD1 C, Sig=220,4 Ref=360,100

| Peak # | RetTime [min] | Type | Width [min] | Area [mAU*s] | Height [mAU] | Area %  |
|--------|---------------|------|-------------|--------------|--------------|---------|
| 1      | 5.206         | BB   | 0.1649      | 525.93671    | 44.81403     | 3.8558  |
| 2      | 6.005         | BBA  | 0.2438      | 1.31142e4    | 832.27734    | 96.1442 |



## HPLC spectra of 2n

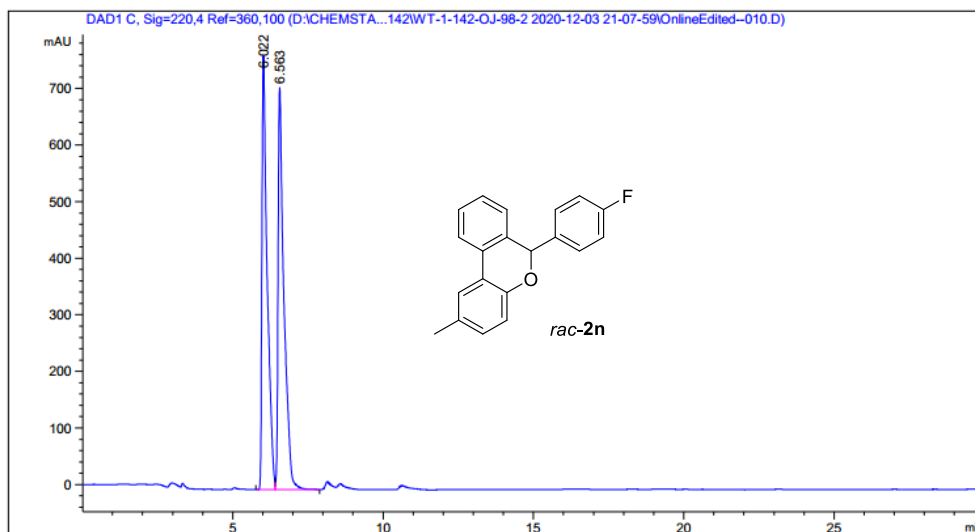

Signal 1: DAD1 C, Sig=220,4 Ref=360,100

| Peak # | RetTime [min] | Type | Width [min] | Area [mAU*s] | Height [mAU] | Area %  |
|--------|---------------|------|-------------|--------------|--------------|---------|
| 1      | 6.022         | BV   | 0.1681      | 9217.93750   | 767.82147    | 49.1509 |
| 2      | 6.563         | VB   | 0.1865      | 9536.43848   | 711.01819    | 50.8491 |

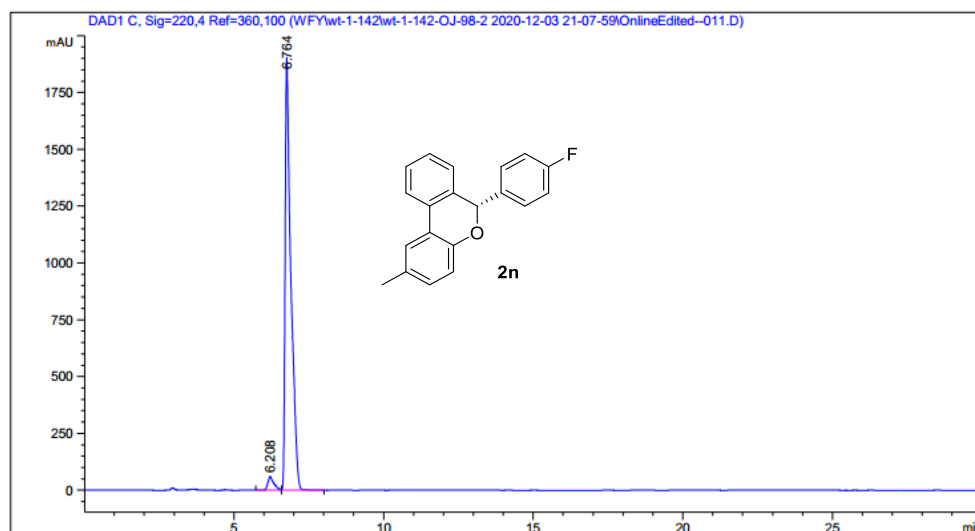

Signal 1: DAD1 C, Sig=220,4 Ref=360,100

| Peak # | RetTime [min] | Type | Width [min] | Area [mAU*s] | Height [mAU] | Area %  |
|--------|---------------|------|-------------|--------------|--------------|---------|
| 1      | 6.208         | VV R | 0.1888      | 840.06775    | 60.94250     | 3.1835  |
| 2      | 6.764         | VB   | 0.1864      | 2.55479e4    | 1905.57568   | 96.8165 |

## HPLC spectra of **2o**

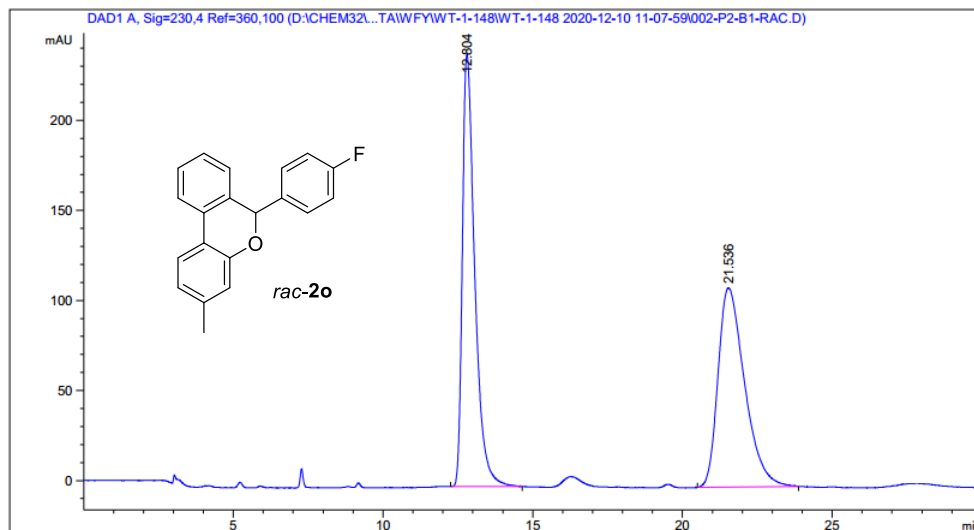

Signal 1: DAD1 A, Sig=230,4 Ref=360,100

| Peak # | RetTime [min] | Type | Width [min] | Area [mAU*s] | Height [mAU] | Area %  |
|--------|---------------|------|-------------|--------------|--------------|---------|
| 1      | 12.804        | BB   | 0.4338      | 6906.73193   | 239.99565    | 50.3216 |
| 2      | 21.536        | BB   | 0.8491      | 6818.44385   | 110.62206    | 49.6784 |

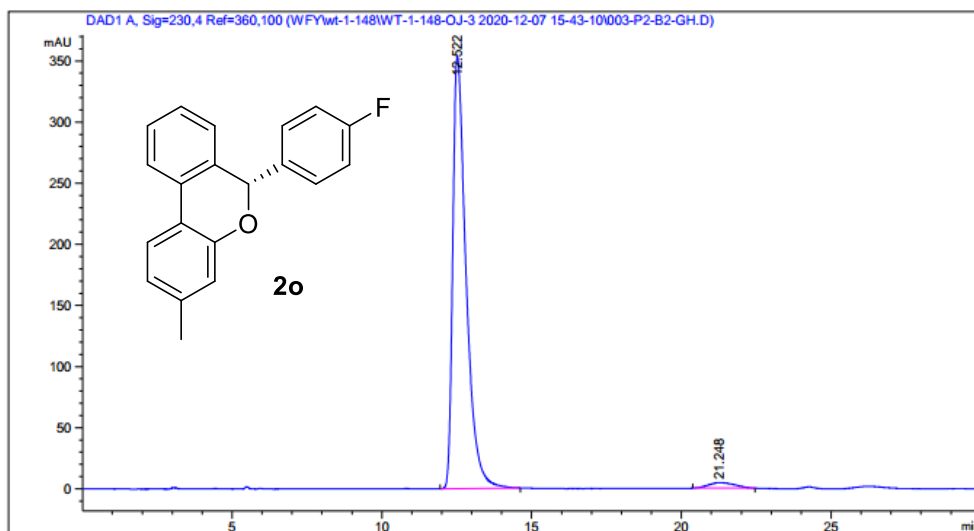

Signal 1: DAD1 A, Sig=230,4 Ref=360,100

| Peak # | RetTime [min] | Type | Width [min] | Area [mAU*s] | Height [mAU] | Area %  |
|--------|---------------|------|-------------|--------------|--------------|---------|
| 1      | 12.522        | BB   | 0.4629      | 1.09407e4    | 353.68549    | 97.5156 |
| 2      | 21.248        | BB   | 0.7192      | 278.73898    | 4.57257      | 2.4844  |

## HPLC spectra of 2p

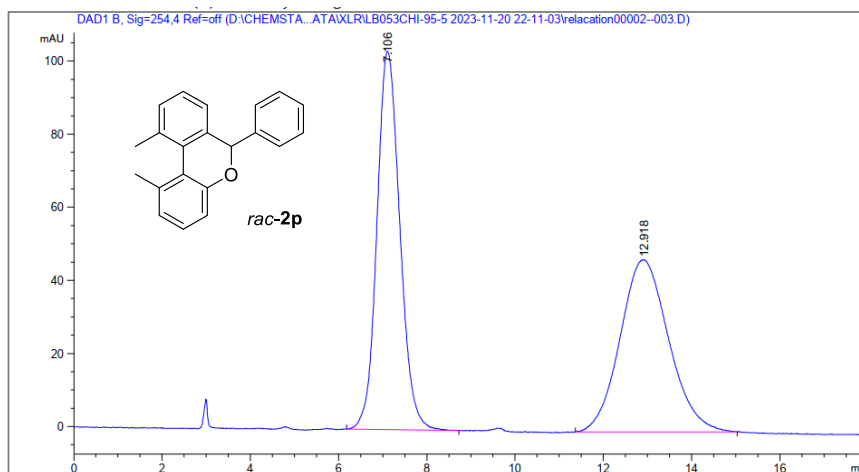

Signal 1: DAD1 B, Sig=254,4 Ref=off

| Peak # | RetTime [min] | Type | Width [min] | Area [mAU*s] | Height [mAU] | Area %  |
|--------|---------------|------|-------------|--------------|--------------|---------|
| 1      | 7.106         | BB   | 0.5634      | 3735.50708   | 103.42138    | 50.9475 |
| 2      | 12.918        | BB   | 0.9334      | 3596.55835   | 47.07096     | 49.0525 |

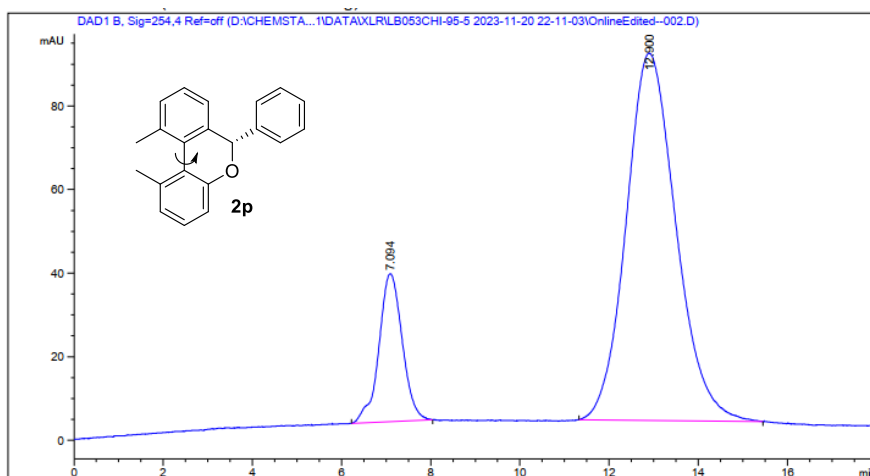

Signal 1: DAD1 B, Sig=254,4 Ref=off

| Peak # | RetTime [min] | Type | Width [min] | Area [mAU*s] | Height [mAU] | Area %  |
|--------|---------------|------|-------------|--------------|--------------|---------|
| 1      | 7.094         | BB   | 0.5415      | 1284.99854   | 35.39694     | 15.8565 |
| 2      | 12.900        | BB   | 0.9451      | 6818.91943   | 87.89438     | 84.1435 |

## HPLC Spectra of 4a

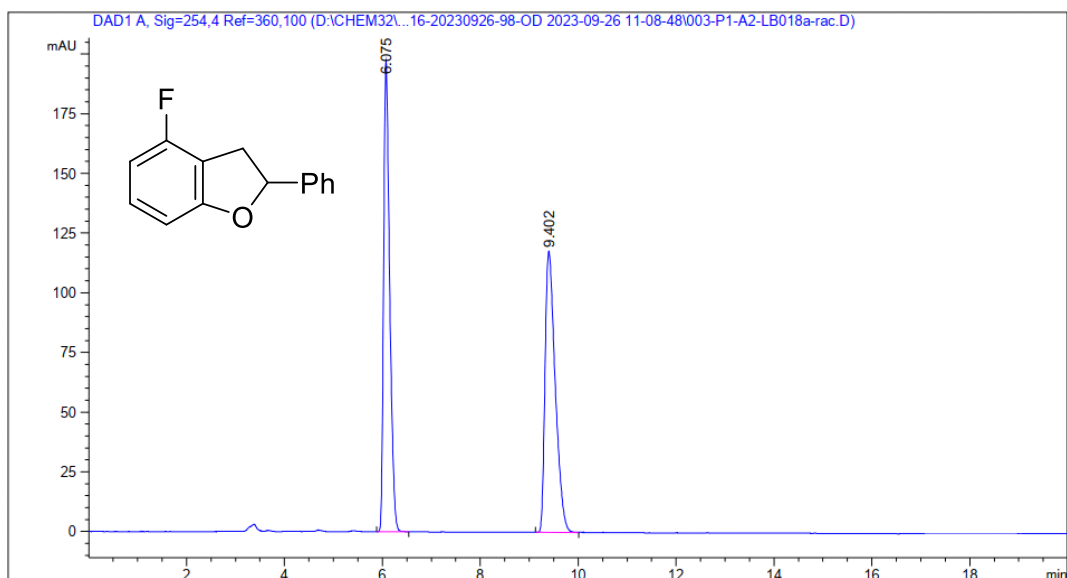

| Peak # | RetTime [min] | Type | Width [min] | Area [mAU*s] | Height [mAU] | Area %  |
|--------|---------------|------|-------------|--------------|--------------|---------|
| 1      | 6.075         | BB   | 0.1299      | 1688.23120   | 197.09761    | 49.7813 |
| 2      | 9.402         | BB   | 0.2188      | 1703.06152   | 117.72148    | 50.2187 |

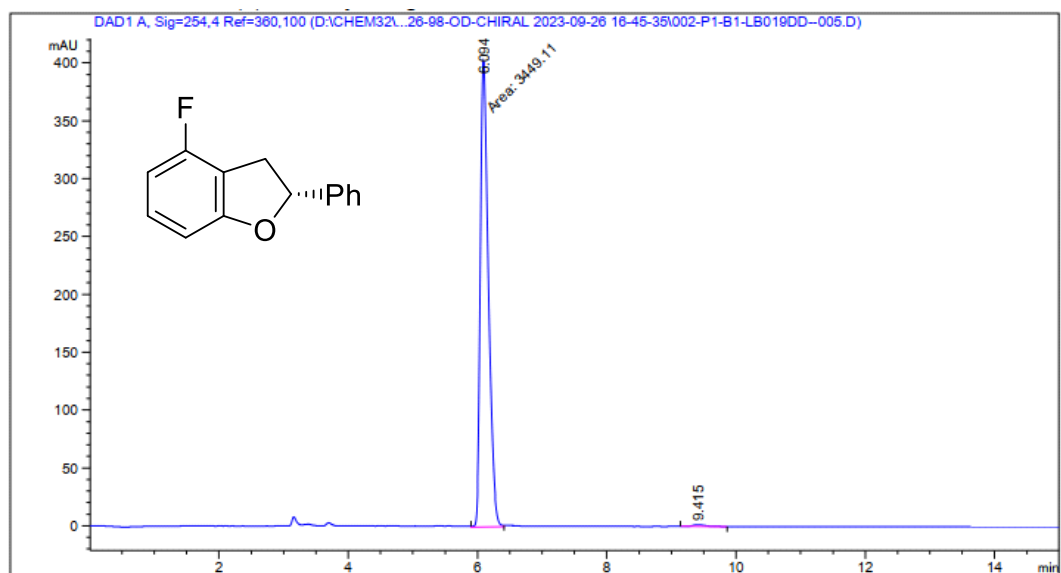

| Peak # | RetTime [min] | Type | Width [min] | Area [mAU*s] | Height [mAU] | Area %  |
|--------|---------------|------|-------------|--------------|--------------|---------|
| 1      | 6.094         | MM   | 0.1427      | 3449.10840   | 402.84155    | 99.3915 |
| 2      | 9.415         | BB   | 0.2039      | 21.11502     | 1.50298      | 0.6085  |

## HPLC spectra of 4b

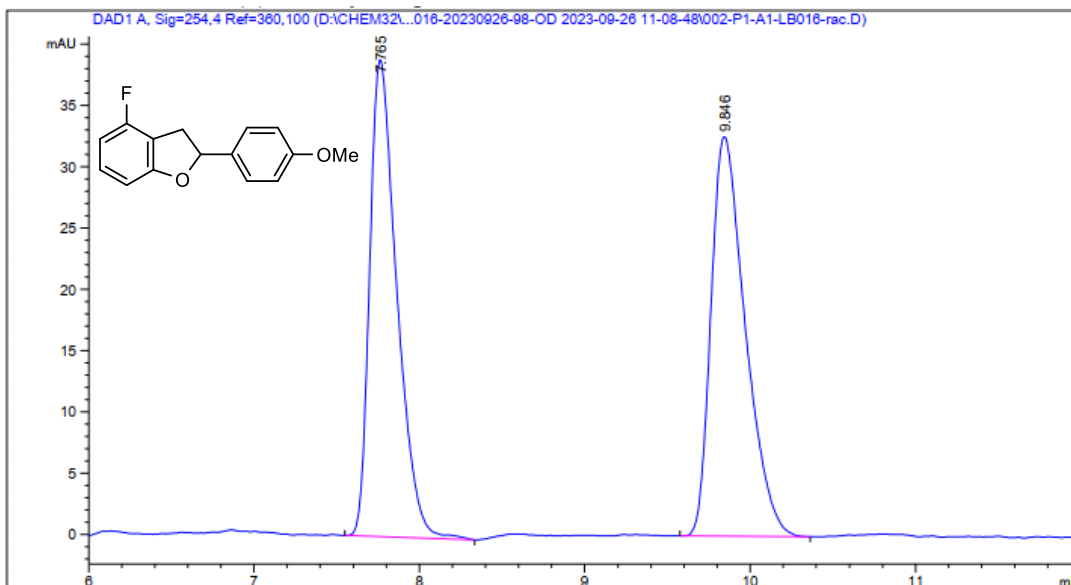

| Peak # | RetTime [min] | Type | Width [min] | Area [mAU*s] | Height [mAU] | Area %  |
|--------|---------------|------|-------------|--------------|--------------|---------|
| 1      | 7.765         | BB   | 0.1707      | 442.66223    | 38.91879     | 48.5392 |
| 2      | 9.846         | BB   | 0.2178      | 469.30646    | 32.62306     | 51.4608 |

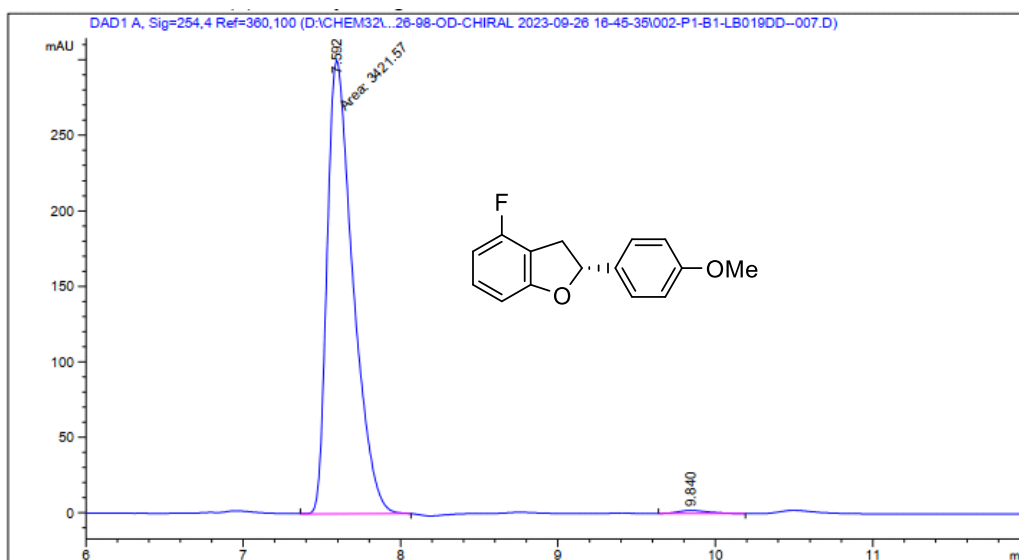

| Peak # | RetTime [min] | Type | Width [min] | Area [mAU*s] | Height [mAU] | Area %  |
|--------|---------------|------|-------------|--------------|--------------|---------|
| 1      | 7.592         | MM   | 0.1900      | 3421.56616   | 300.16470    | 99.1847 |
| 2      | 9.840         | BB   | 0.1989      | 28.12538     | 2.03892      | 0.8153  |

## HPLC spectra of 4c

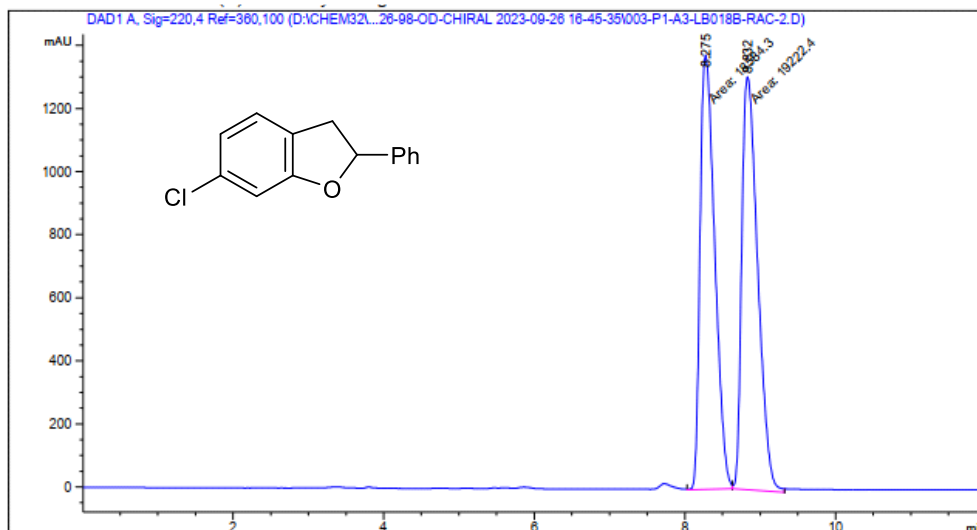

| Peak # | RetTime [min] | Type | Width [min] | Area [mAU*s] | Height [mAU] | Area %  |
|--------|---------------|------|-------------|--------------|--------------|---------|
| 1      | 8.275         | MM   | 0.2252      | 1.85843e4    | 1375.27368   | 49.1560 |
| 2      | 8.832         | MM   | 0.2447      | 1.92224e4    | 1309.39771   | 50.8440 |

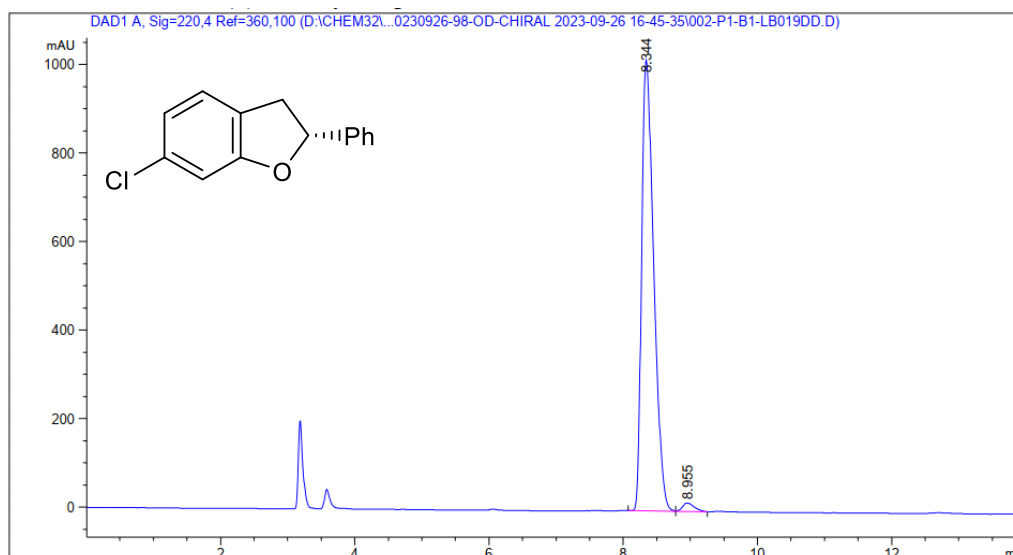

| Peak # | RetTime [min] | Type | Width [min] | Area [mAU*s] | Height [mAU] | Area %  |
|--------|---------------|------|-------------|--------------|--------------|---------|
| 1      | 8.344         | BV   | 0.1920      | 1.27389e4    | 1018.18463   | 98.2250 |
| 2      | 8.955         | VB   | 0.1818      | 230.20641    | 18.94492     | 1.7750  |

# HPLC spectra of 4d

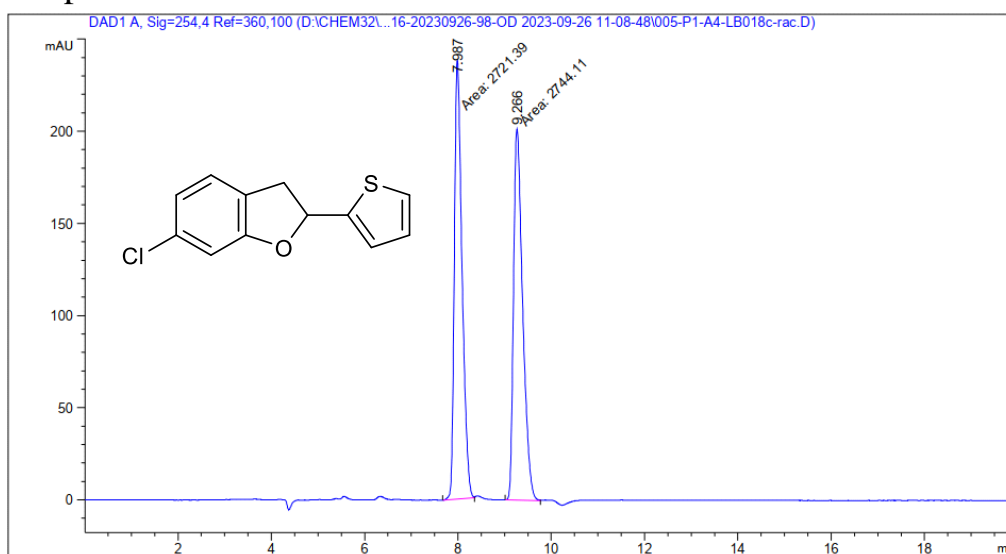

| Peak # | RetTime [min] | Type | Width [min] | Area [mAU*s] | Height [mAU] | Area %  |
|--------|---------------|------|-------------|--------------|--------------|---------|
| 1      | 7.987         | MM   | 0.1905      | 2721.38770   | 238.08713    | 49.7921 |
| 2      | 9.266         | MM   | 0.2269      | 2744.11304   | 201.56805    | 50.2079 |

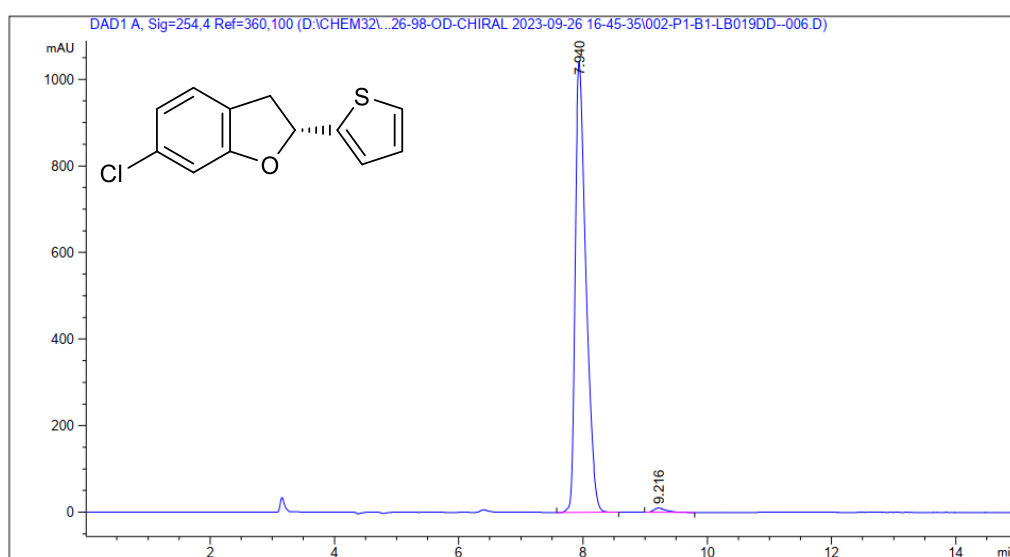

| Peak # | RetTime [min] | Type | Width [min] | Area [mAU*s] | Height [mAU] | Area %  |
|--------|---------------|------|-------------|--------------|--------------|---------|
| 1      | 7.940         | BB   | 0.1809      | 1.25469e4    | 1038.81799   | 98.9437 |
| 2      | 9.216         | BB   | 0.1978      | 133.95139    | 9.90094      | 1.0563  |

## HPLC spectra of 4e

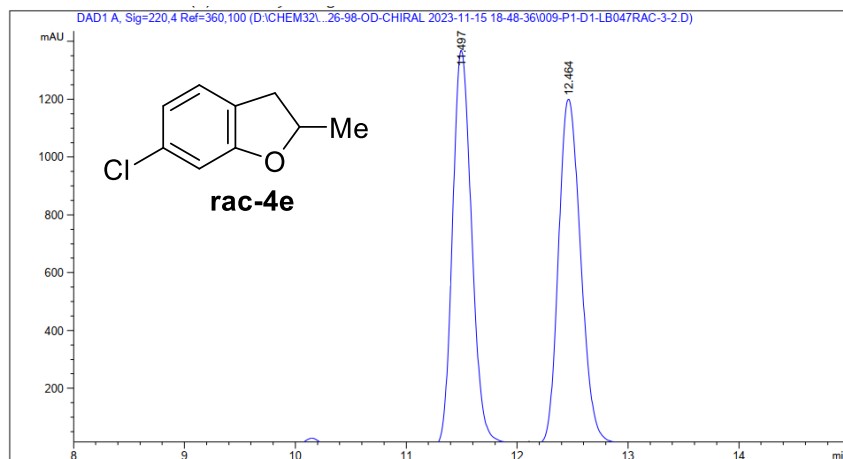

| Peak # | RetTime [min] | Type | Width [min] | Area [mAU*s] | Height [mAU] | Area %  |
|--------|---------------|------|-------------|--------------|--------------|---------|
| 1      | 11.497        | BV   | 0.1893      | 1.65813e4    | 1369.40454   | 49.3418 |
| 2      | 12.464        | VV R | 0.2233      | 1.70237e4    | 1201.26953   | 50.6582 |

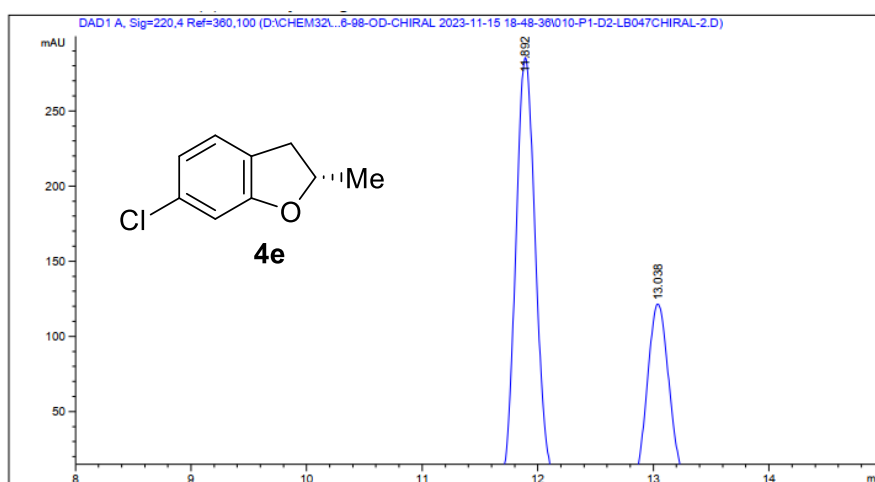

| Peak # | RetTime [min] | Type | Width [min] | Area [mAU*s] | Height [mAU] | Area %  |
|--------|---------------|------|-------------|--------------|--------------|---------|
| 1      | 11.892        | VV R | 0.1896      | 3547.44092   | 288.18481    | 67.2370 |
| 2      | 13.038        | BB   | 0.2179      | 1728.58154   | 124.56258    | 32.7630 |

Totals : 5276.02246 412.74739



## 7. Crystallographic Information

The crystal data of compound **2j** has been deposited in CCDC with number 2079412.

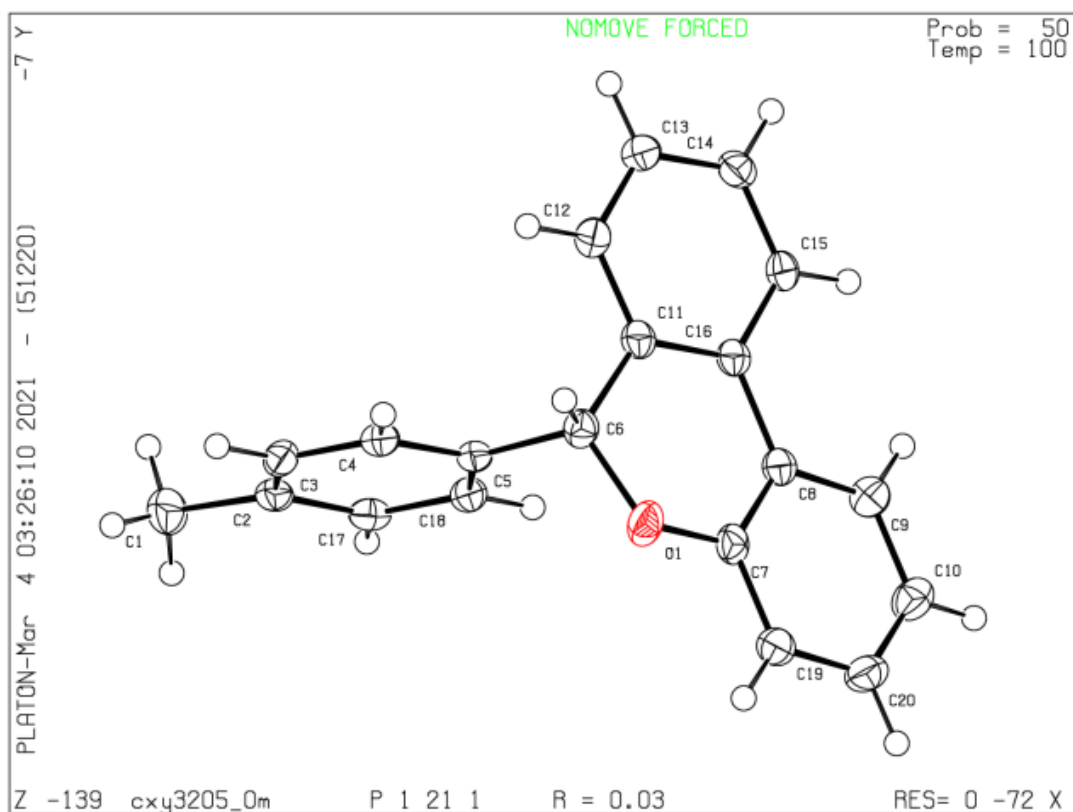

**Table S3. Crystal data and structure refinement for cxy3205\_0m.**

|                     |                                   |
|---------------------|-----------------------------------|
| Identification code | cxy3205_0m                        |
| Empirical formula   | C <sub>20</sub> H <sub>16</sub> O |
| Formula weight      | 272.33                            |
| Temperature/K       | 100.0                             |
| Crystal system      | orthorhombic                      |
| Space group         | P2 <sub>1</sub>                   |
| a/Å                 | 8.9234(7)                         |
| b/Å                 | 5.6665(4)                         |
| c/Å                 | 14.4134(11)                       |
| α/°                 | 90                                |
| β/°                 | 106.079(3)                        |

|                                               |                                                               |
|-----------------------------------------------|---------------------------------------------------------------|
| $\gamma/^\circ$                               | 90                                                            |
| Volume/ $\text{\AA}^3$                        | 700.30(9)                                                     |
| Z                                             | 2                                                             |
| $\rho_{\text{calc}}/\text{g/cm}^3$            | 1.291                                                         |
| $\mu/\text{mm}^{-1}$                          | 0.603                                                         |
| F(000)                                        | 288.0                                                         |
| Crystal size/ $\text{mm}^3$                   | $0.35 \times 0.33 \times 0.28$                                |
| Radiation                                     | CuK $\alpha$ ( $\lambda = 1.54178$ )                          |
| 2 $\Theta$ range for data collection/         | 6.382 to 136.36                                               |
| Index ranges                                  | $-10 \leq h \leq 10, -6 \leq k \leq 6, -17 \leq l \leq 17$    |
| Reflections collected                         | 13047                                                         |
| Independent reflections                       | 2544 [ $R_{\text{int}} = 0.0301, R_{\text{sigma}} = 0.0213$ ] |
| Data/restraints/parameters                    | 2544/1/192                                                    |
| Goodness-of-fit on $F^2$                      | 1.050                                                         |
| Final R indexes [ $I \geq 2\sigma(I)$ ]       | $R_1 = 0.0258, wR_2 = 0.0693$                                 |
| Final R indexes [all data]                    | $R_1 = 0.0260, wR_2 = 0.0695$                                 |
| Largest diff. peak/hole / $e \text{\AA}^{-3}$ | 0.15/-0.11                                                    |
| Flack parameter                               | 0.17(7)                                                       |

**Table S4. Fractional Atomic Coordinates ( $\times 10^4$ ) and Equivalent Isotropic Displacement Parameters ( $\text{\AA}^2 \times 10^3$ ) for cxy3205\_0m.  $U_{\text{eq}}$  is defined as 1/3 of of the trace of the orthogonalised  $U_{\text{ij}}$  tensor.**

| Atom | x          | y       | z          | U(eq)   |
|------|------------|---------|------------|---------|
| O1   | 3941.8(14) | 7166(2) | 7557.5(9)  | 31.0(3) |
| C1   | 8005(2)    | 5746(4) | 4449.4(13) | 34.8(4) |
| C2   | 7324.1(18) | 6108(3) | 5287.4(11) | 23.8(4) |
| C3   | 7663.9(18) | 8116(3) | 5859.6(12) | 23.3(4) |
| C4   | 7079.9(18) | 8398(3) | 6654.0(11) | 21.5(3) |
| C5   | 6150.0(17) | 6665(3) | 6892.6(10) | 19.0(3) |
| C6   | 5614.6(18) | 6952(3) | 7797.9(11) | 22.3(4) |
| C7   | 3029.4(19) | 5345(3) | 7712.1(11) | 22.9(4) |
| C8   | 3626.9(19) | 3403(3) | 8292.7(11) | 21.2(4) |
| C9   | 2575(2)    | 1686(3) | 8415.8(12) | 25.9(4) |
| C10  | 987(2)     | 1916(4) | 7990.5(13) | 29.6(4) |
| C11  | 6268.8(19) | 5039(3) | 8531.9(11) | 21.8(3) |

|     |            |         |            |         |
|-----|------------|---------|------------|---------|
| C12 | 7870.0(19) | 5016(3) | 8965.1(12) | 26.1(4) |
| C13 | 8538.6(19) | 3316(4) | 9640.9(12) | 27.9(4) |
| C14 | 7604.0(19) | 1621(3) | 9895.8(11) | 24.9(4) |
| C15 | 6009.9(19) | 1618(3) | 9462.4(11) | 21.8(3) |
| C16 | 5317.9(18) | 3310(3) | 8766.6(11) | 19.9(3) |
| C17 | 6356.1(18) | 4399(3) | 5517.7(11) | 22.6(3) |
| C18 | 5786.0(17) | 4659(3) | 6313.5(11) | 21.4(3) |
| C19 | 1433.8(19) | 5594(3) | 7290.5(12) | 27.1(4) |
| C20 | 416(2)     | 3880(4) | 7436.2(12) | 29.0(4) |

## 8. References

1. Touge, T.; Nara, H.; Fujiwhara, M.; Kayaki, Y.; Ikariya, T., Efficient Access to Chiral Benzhydrols via Asymmetric Transfer Hydrogenation of Unsymmetrical Benzophenones with Bifunctional Oxo-Tethered Ruthenium Catalysts. *J. Am. Chem. Soc.* **2016**, *138*, 10084-10087.
2. Sun, S.; Ma, Y.; Liu, Z.; Liu, L., Oxidative Kinetic Resolution of Cyclic Benzylic Ethers. *Angew. Chem., Int. Ed.* **2021**, *60*, 176-180.
